# Supplementary material for: Molecular profiles, sources and lineage restrictions of stem cells in an annelid regeneration model
Source: Springer Nature journal article supplement (doi:10.1038/s41467-024-54041-3), 2024-11-18
Supplement: MOESM10 [file 41467_2024_54041_MOESM10_ESM.pdf]

Supplementary data file 7, transgenic clones, part A

Description of the transverse section scheme used for the mapping of transgenic clones

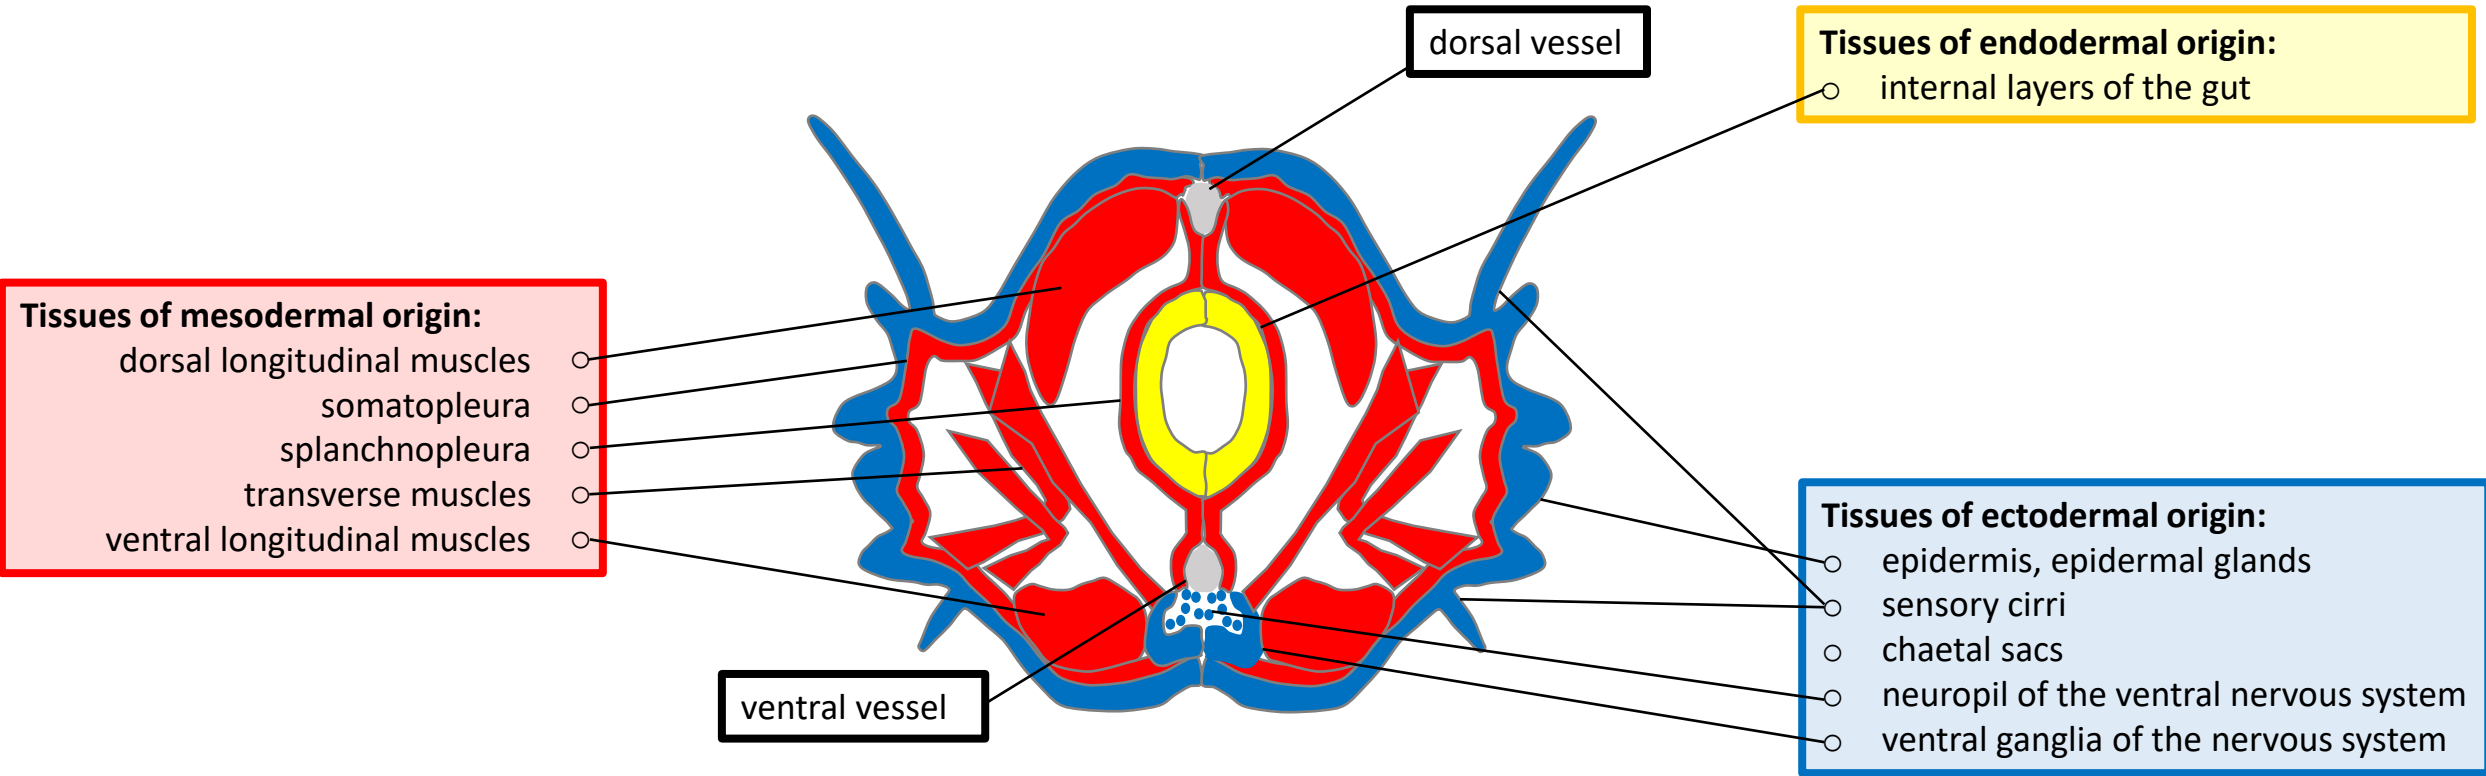

Transgenic tissues are highlighted in the germ layer color code

Transgenic tissues displaying stochastic expression

Non fluorescent tissues (or slightly autofluorescent) are in grey

Schematic frontal section used showing the locations of putative posterior stem cells

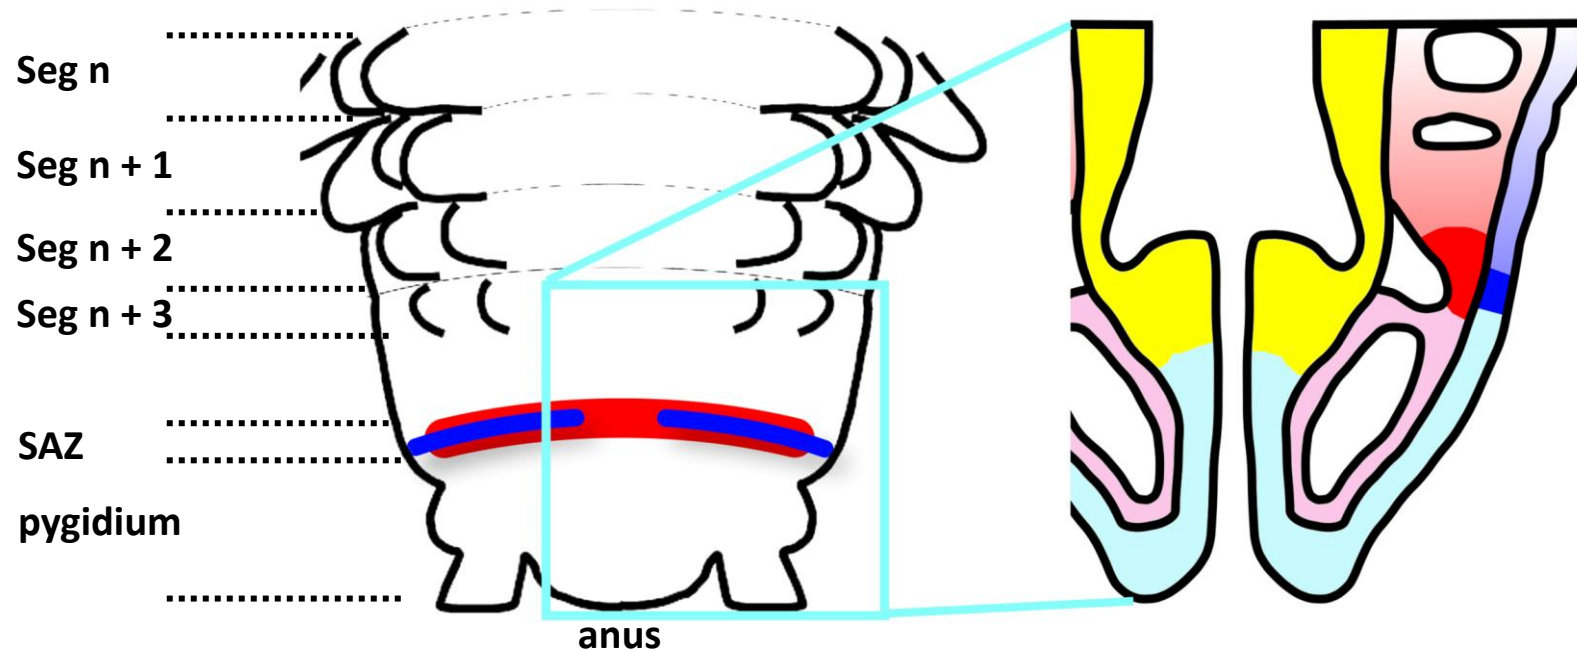

**Tissues of ectodermal origin:**

- epidermis, epidermal glands
- ectodermal PSCs
- pygidial epidermis and hindgut

**Tissues of mesodermal origin:**

- coelothel, muscles
- mesodermal PSCs
- pygidial epidermis and hindgut

**Tissues of endodermal origin:**

- midgut

Description of transmitted light views valid for all confocal acquisitions

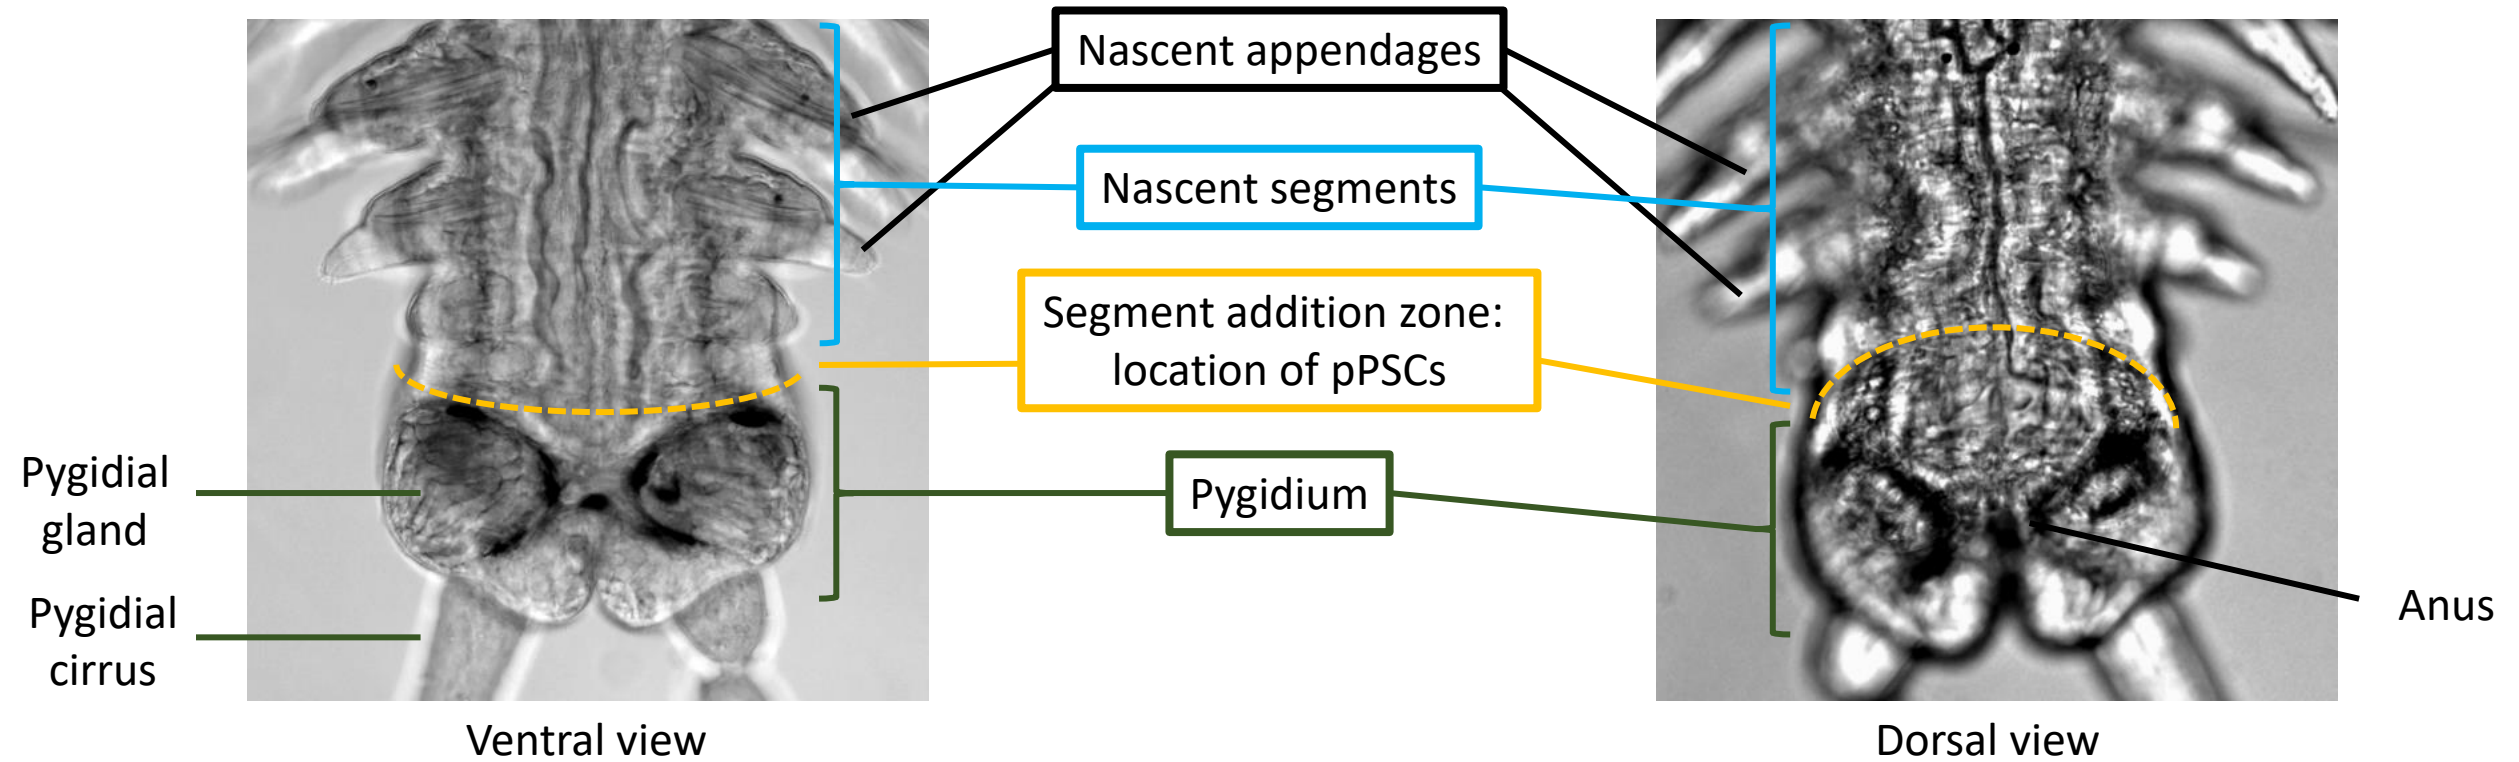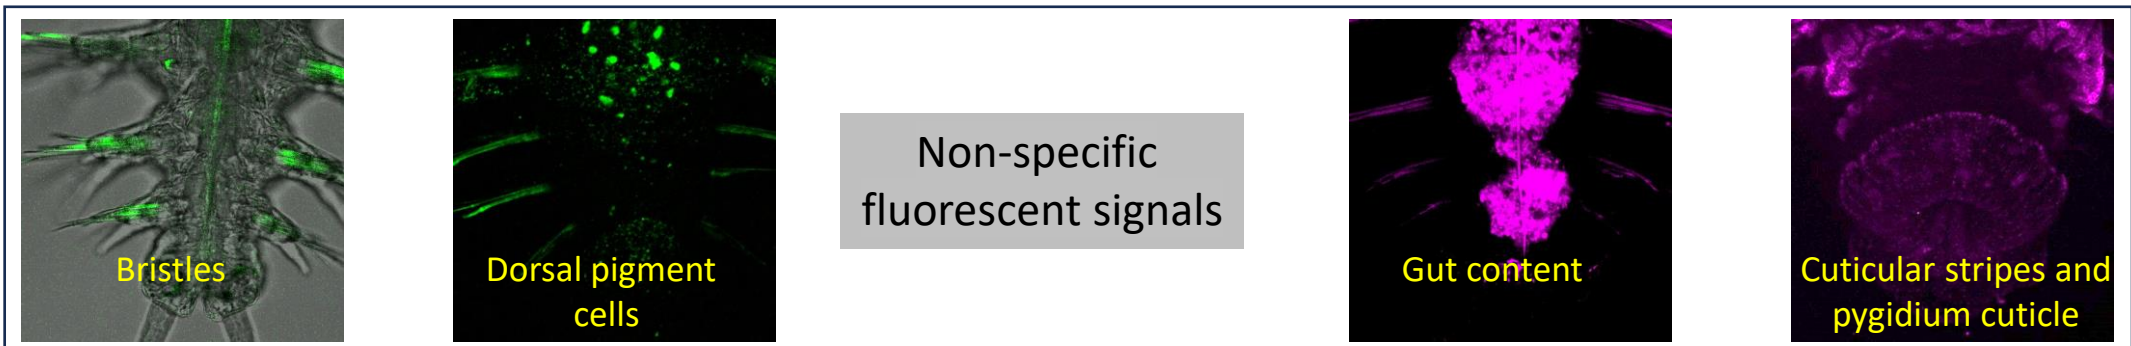

membranes  
nuclei

M01

Full Z-projections

Frontal section  
+ transverse scheme

Transgenic tissues :

- ectoderm
- mesoderm
- endoderm

ORIGINAL TAIL  
(no regeneration)

No data

Accidentally amputated  
before 6 weeks

After 1st amputation-  
regeneration

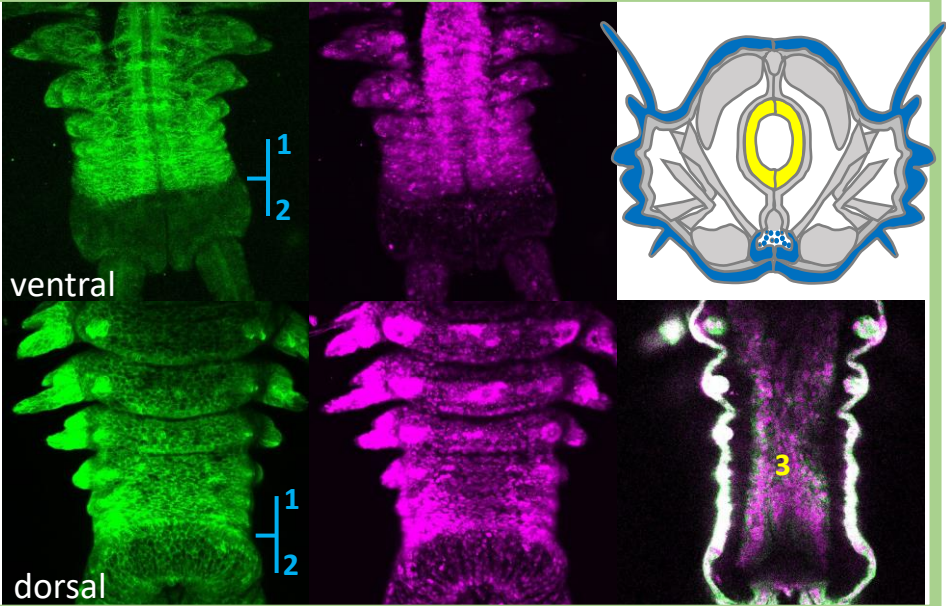

- Segmental ectoderm **1**
- Pygidium ectoderm, weak **2**
- Gut endoderm **3**

After 2nd amputation-  
regeneration

No ventral view

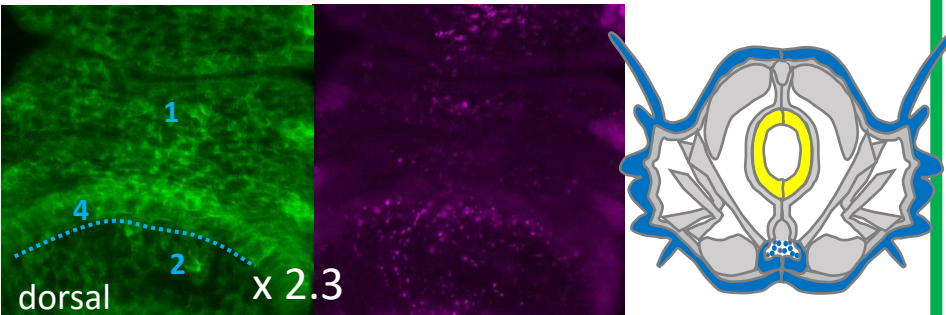

- Segmental ectoderm **1**
- Pygidium ectoderm, weaker **2**
- Ectodermal PSCs? **4**
- Gut endoderm



## Full Z-projections

## Frontal section + transverse scheme

- ectoderm
- mesoderm
- endoderm

ORIGINAL TAIL  
(no regeneration)

No data

### Accidentally amputated before 6 weeks

## After 1st amputation- regeneration

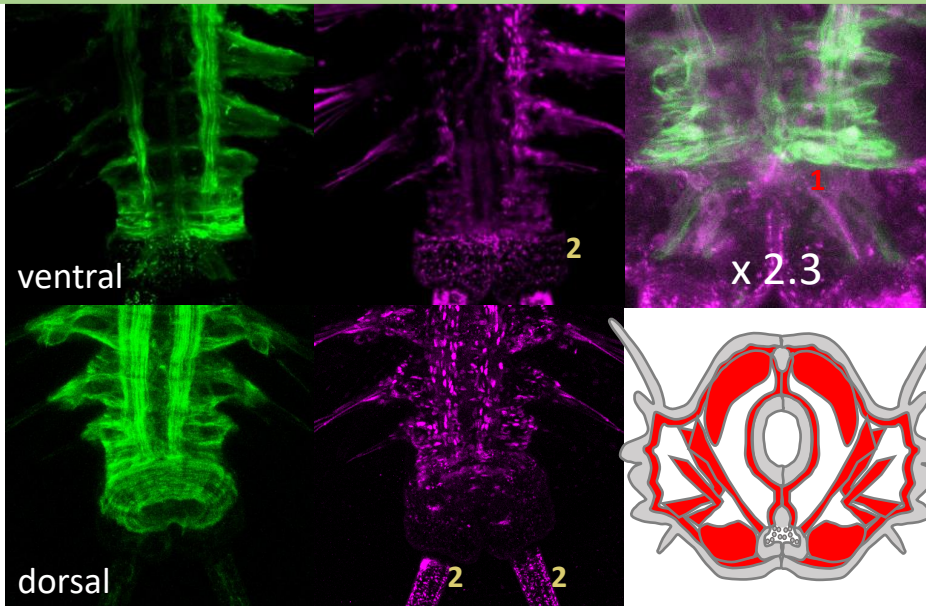

- Whole mesoderm, stronger on left side
- Mesodermal PSCs ? 1
- Autofluorescent cuticle in pygidium 2

## After 2nd amputation- regeneration

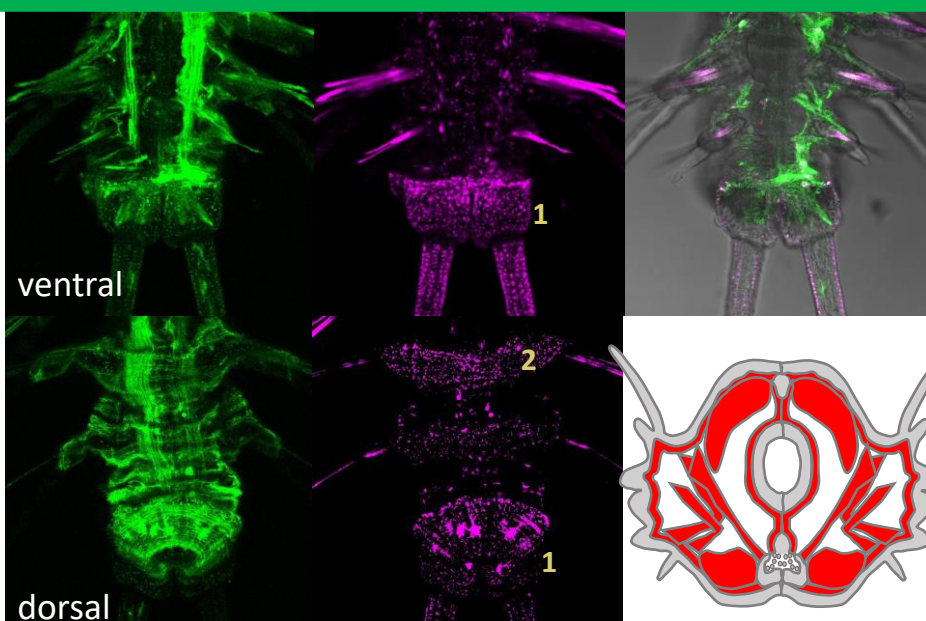

- Whole mesoderm, stronger on left side
- Autofluorescent cuticle in pygidium 1 and segment 2

- ectoderm
- mesoderm
- endoderm

No ventral view

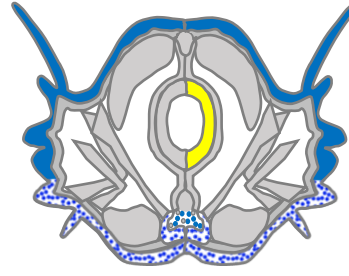

ORIGINAL TAIL  
(no regeneration)

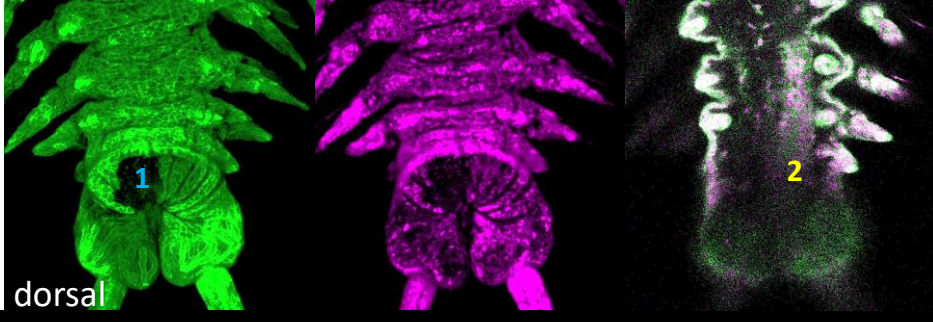

- Segmental ectoderm
- Pygidium ectoderm with a missing clone on the left **1**
- Right endoderm **2**
- A few unidentified internal cells on the left

After 1st amputation-  
regeneration

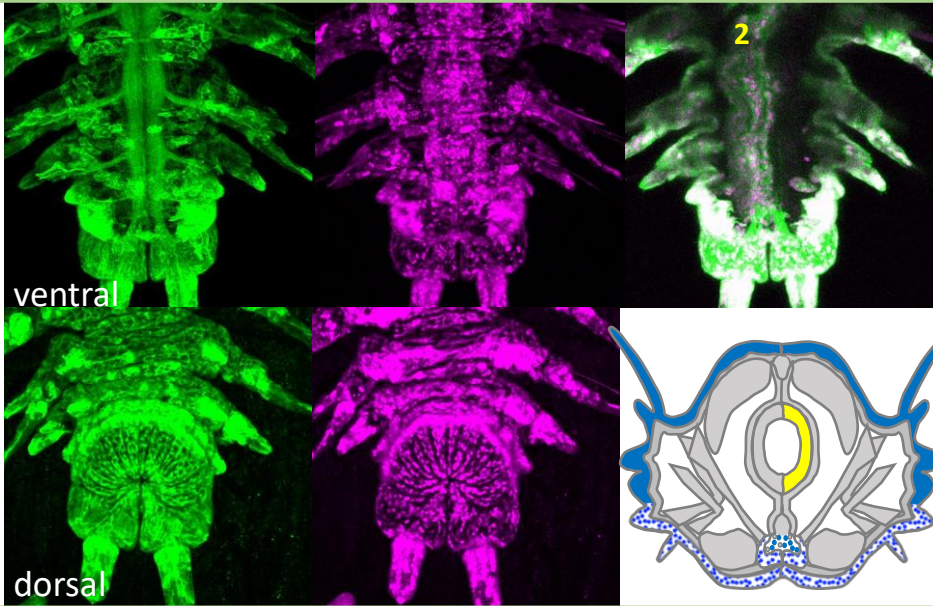

- Segmental ectoderm patchy on the ventral side
- Pygidium ectoderm patchy on the ventral side
- Right endoderm **2**

After 2nd amputation-  
regeneration

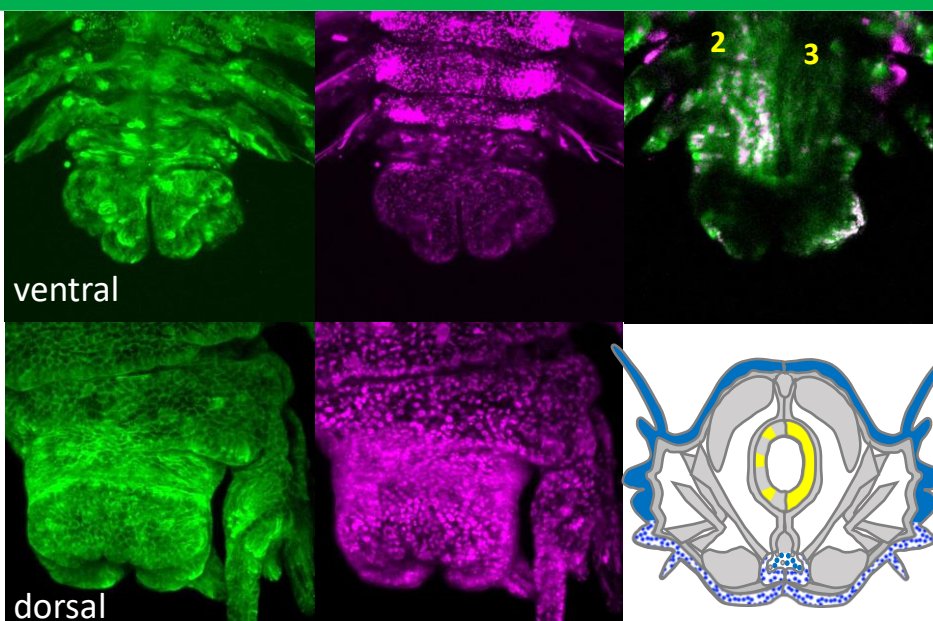

- Segmental ectoderm patchy on the ventral side
- Pygidium ectoderm patchy on the ventral side
- Right endoderm **2** + patches on the left side **3**



- ectoderm
- mesoderm
- endoderm

ORIGINAL TAIL  
(no regeneration)

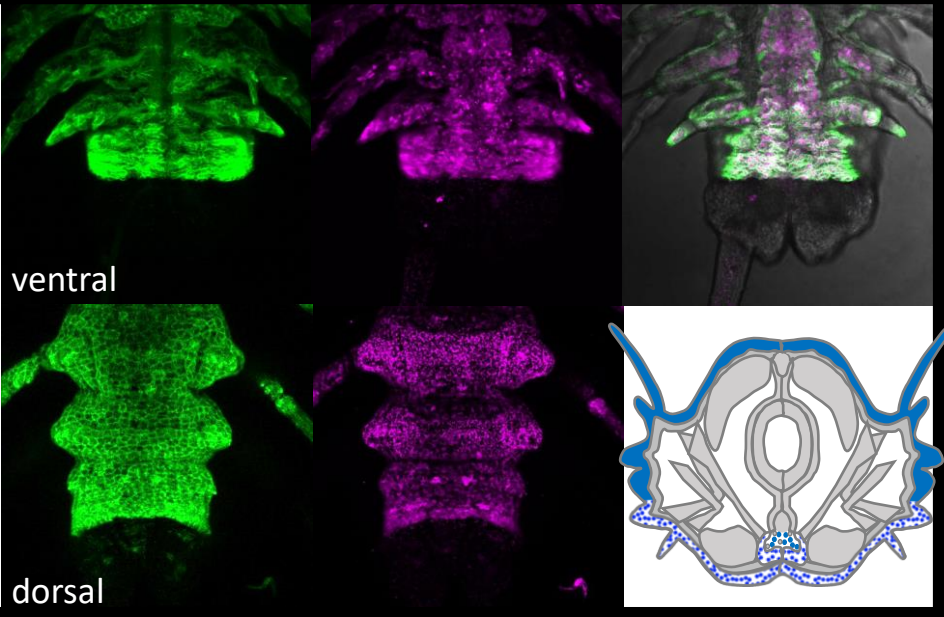

- Segmental ectoderm patchy on the ventral side
- pygidial ectoderm not transgenic

After 1st amputation-  
regeneration

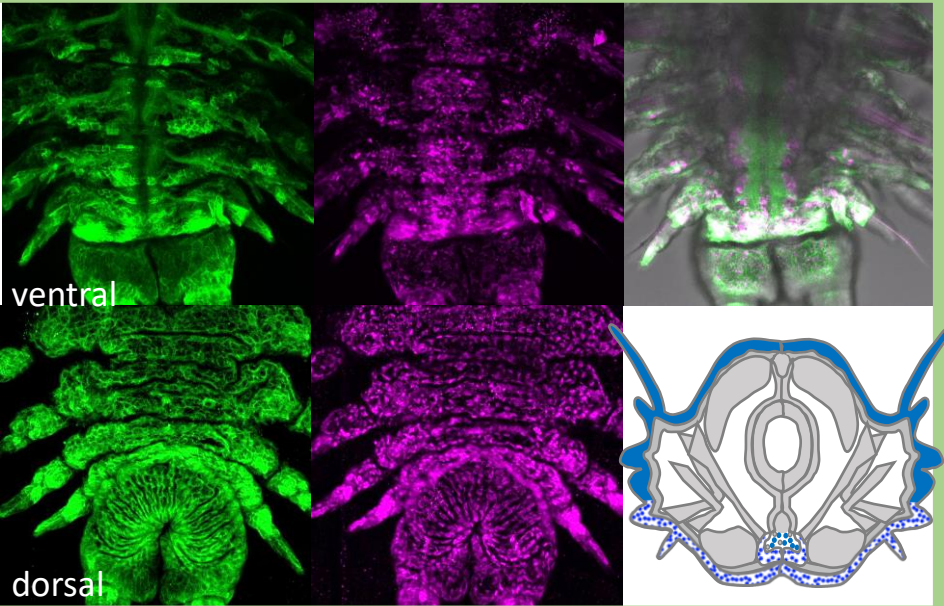

- Segmental ectoderm patchy on the ventral side
- Pygidium ectoderm patchy on the ventral side

After 2nd amputation-  
regeneration

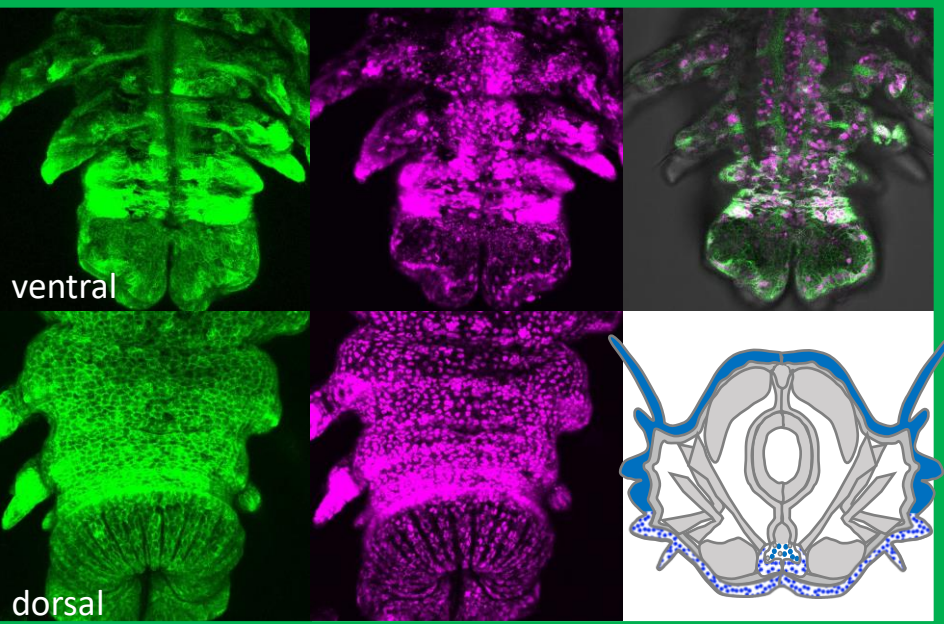

- Segmental ectoderm patchy on the ventral side
- Pygidium ectoderm patchy on the ventral side

- ectoderm
- mesoderm
- endoderm

Full Z-projections

Frontal section  
+ transverse scheme

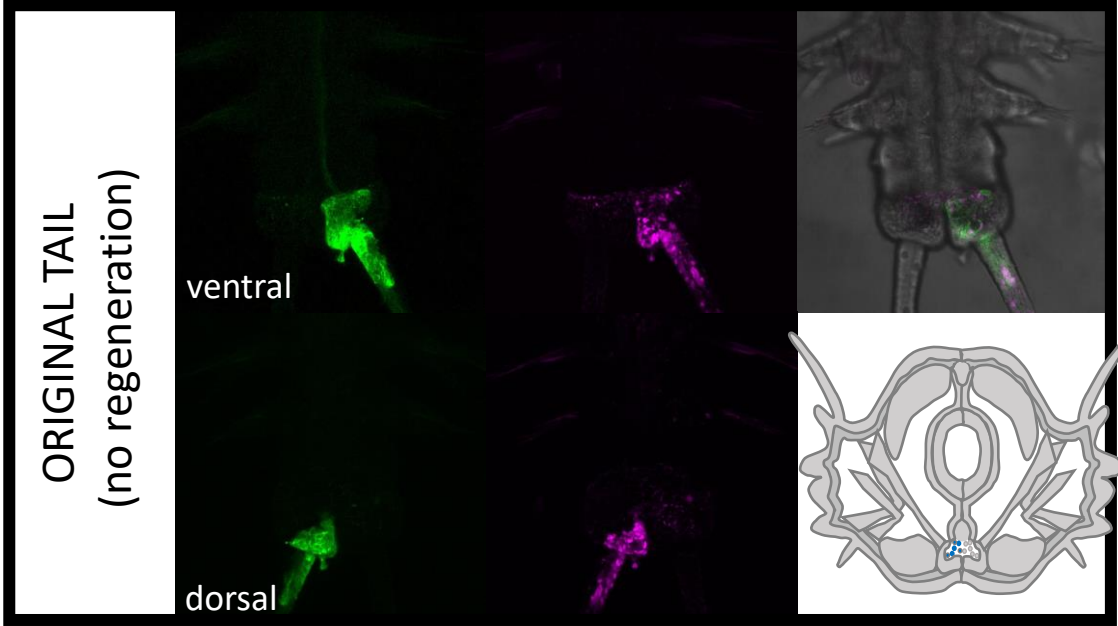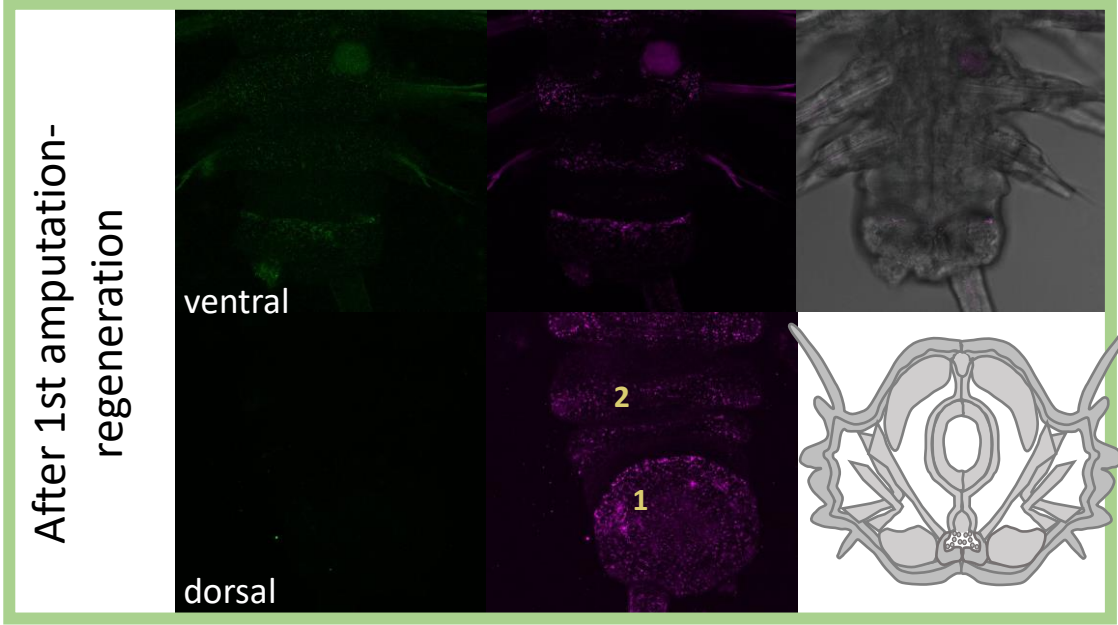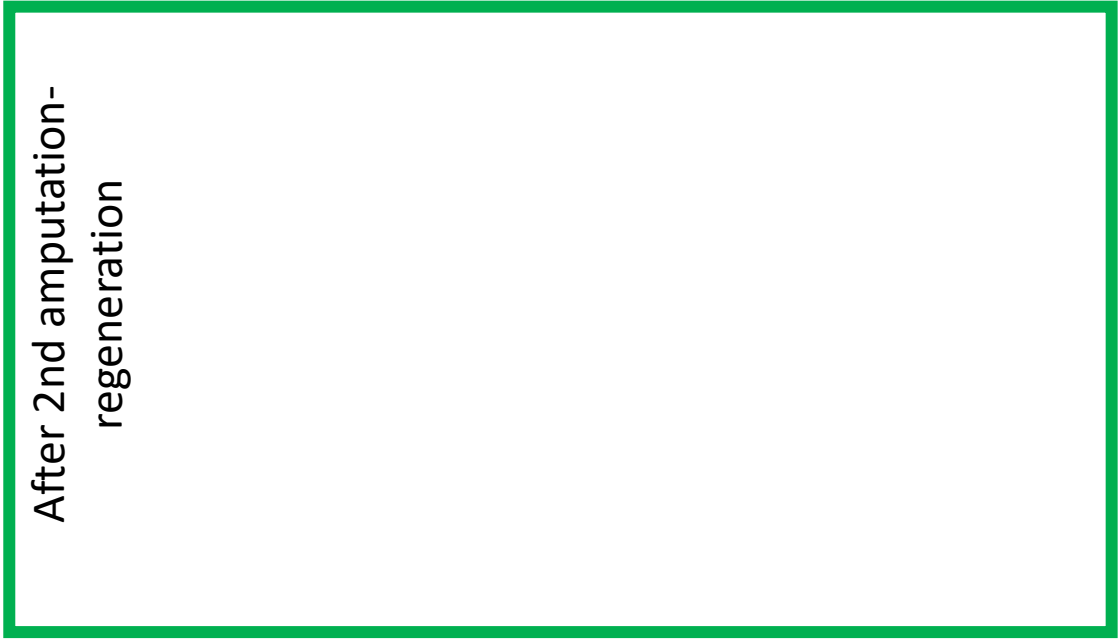



- ectoderm
- mesoderm
- endoderm

Full Z-projections

Frontal section  
+ transverse scheme

ORIGINAL TAIL  
(no regeneration)

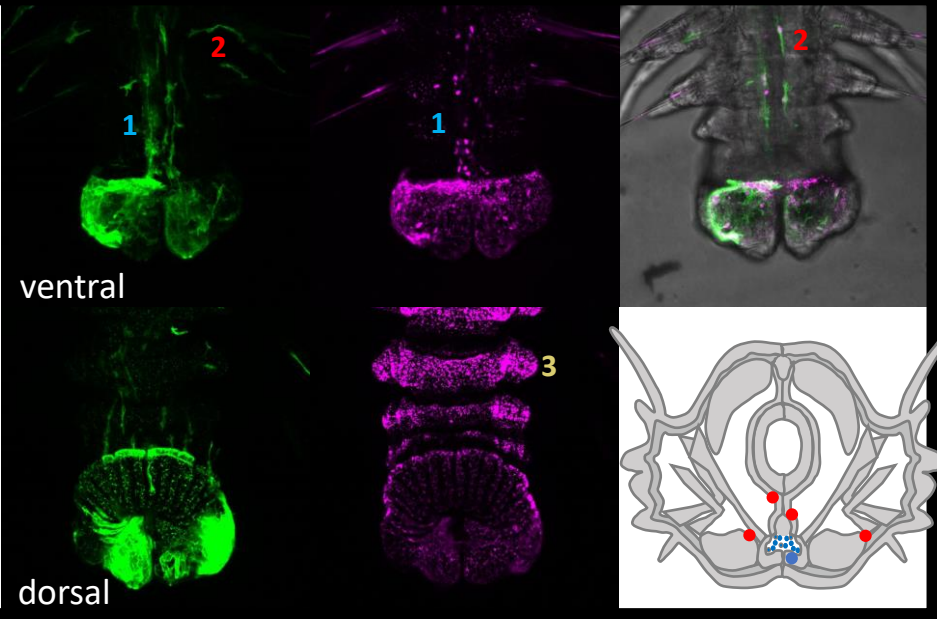

- Pygidium ectoderm, partial
- Right median neural lineage 1
- Few amoeboid cells in segments 2
- Autofluorescent cuticle (dorsal) 3

After 1st amputation-  
regeneration

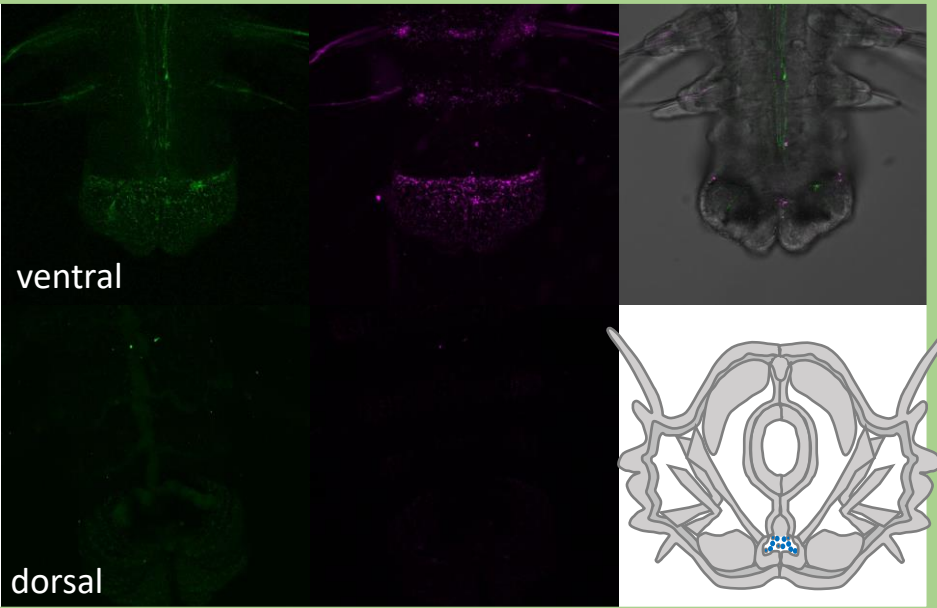

- Brain neurites

After 2nd amputation-  
regeneration

membranes  
nuclei

M10

Full Z-projections

Frontal section  
+ transverse scheme

Transgenic tissues :

- ectoderm
- mesoderm
- endoderm

- Pygidium ectoderm
- Median neural lineage

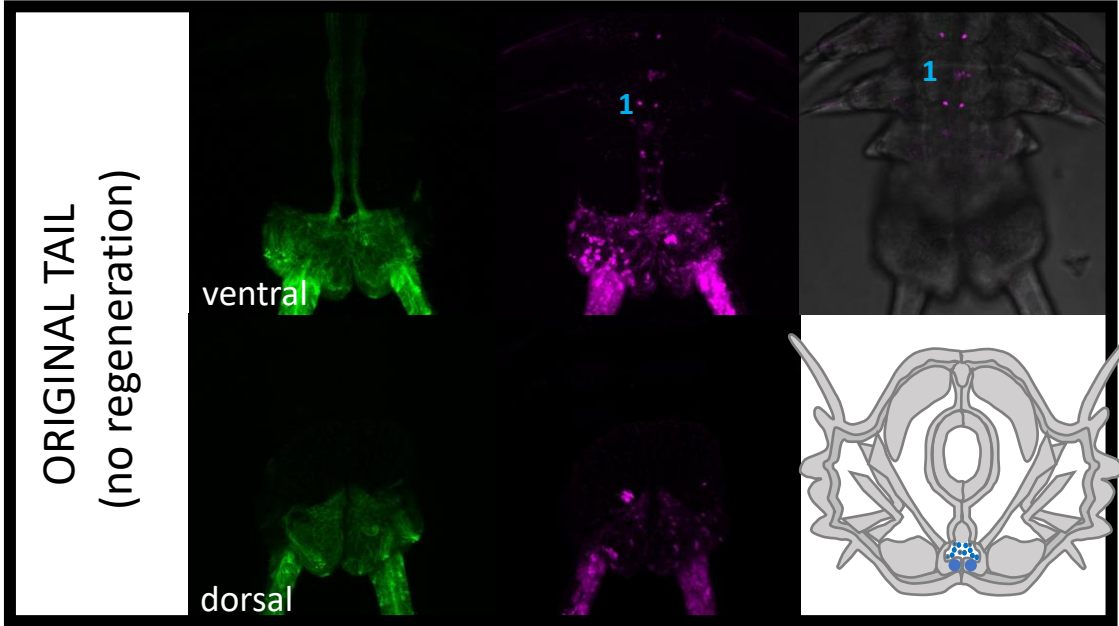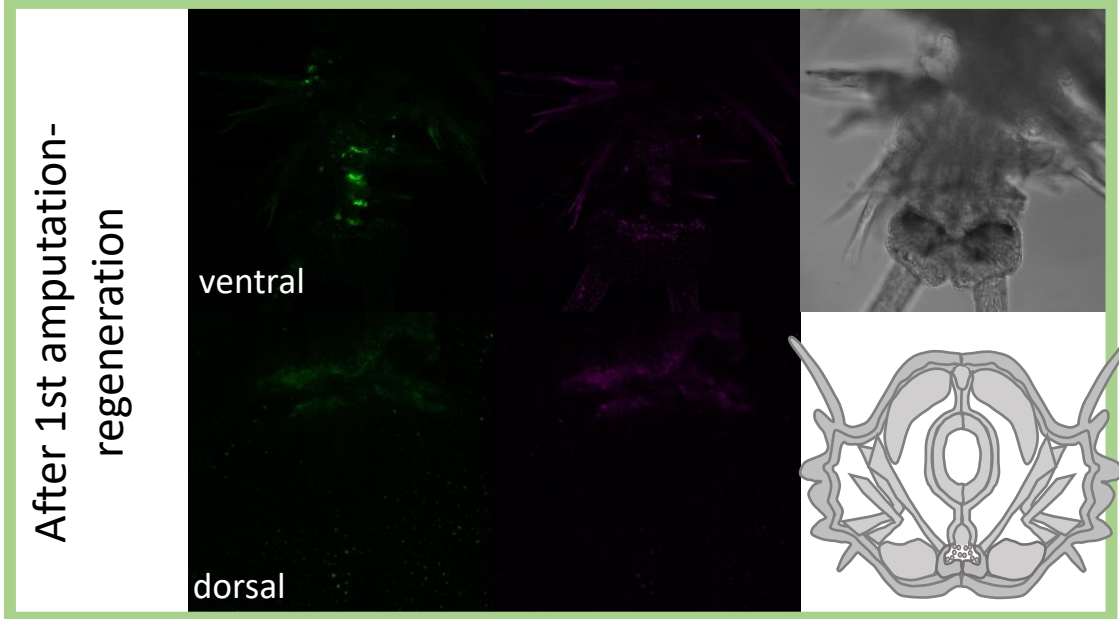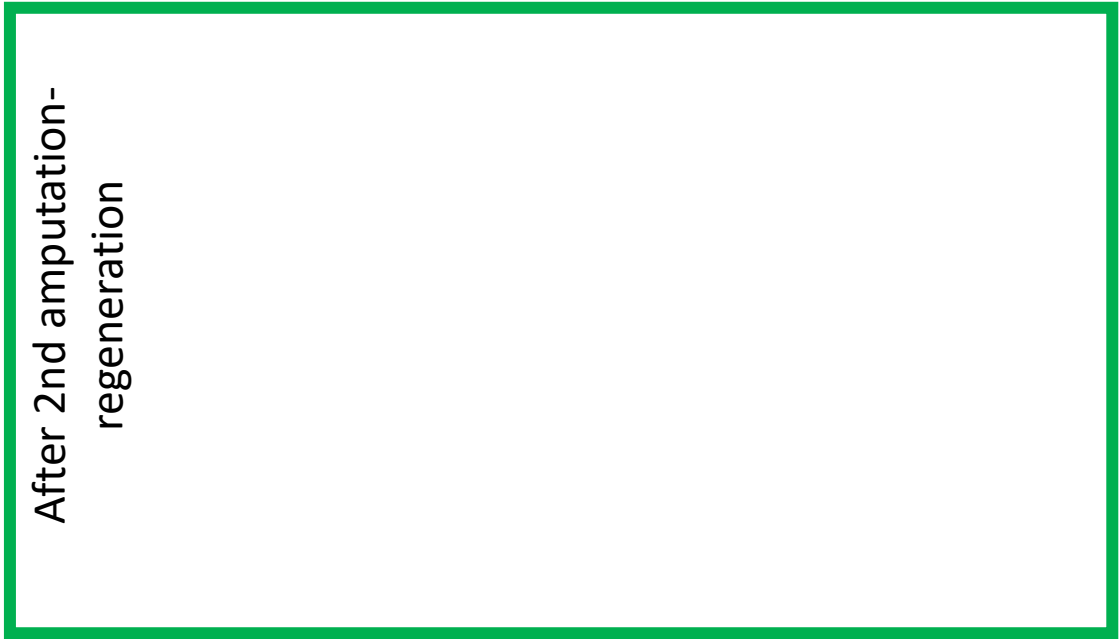

- ectoderm
- mesoderm
- endoderm

ORIGINAL TAIL  
(no regeneration)

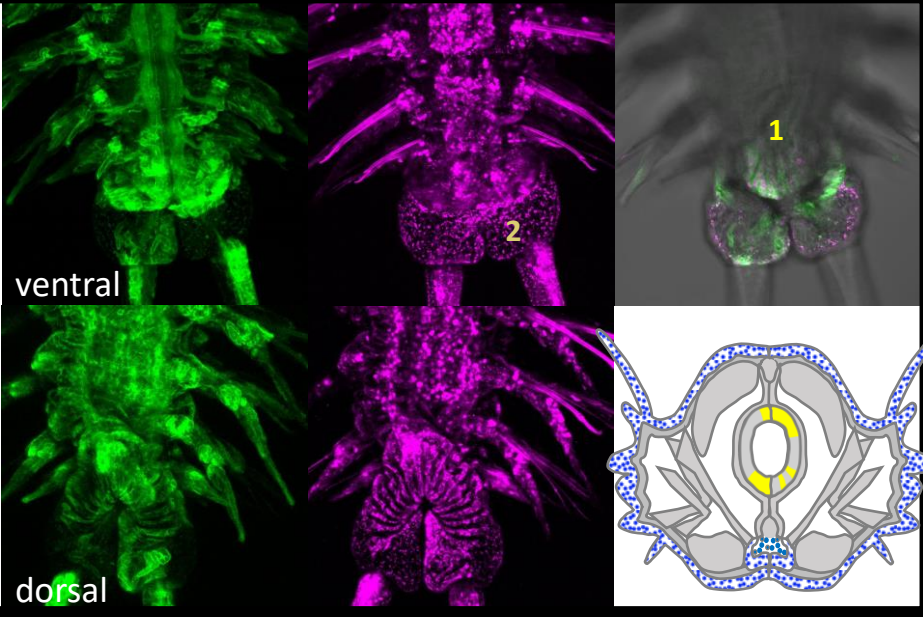

- Segmental ectoderm, variegated
- Pygidium ectoderm, partial
- Endoderm, partial 1
- Autofluorescent cuticle in pygidium 2

After 1st amputation-  
regeneration

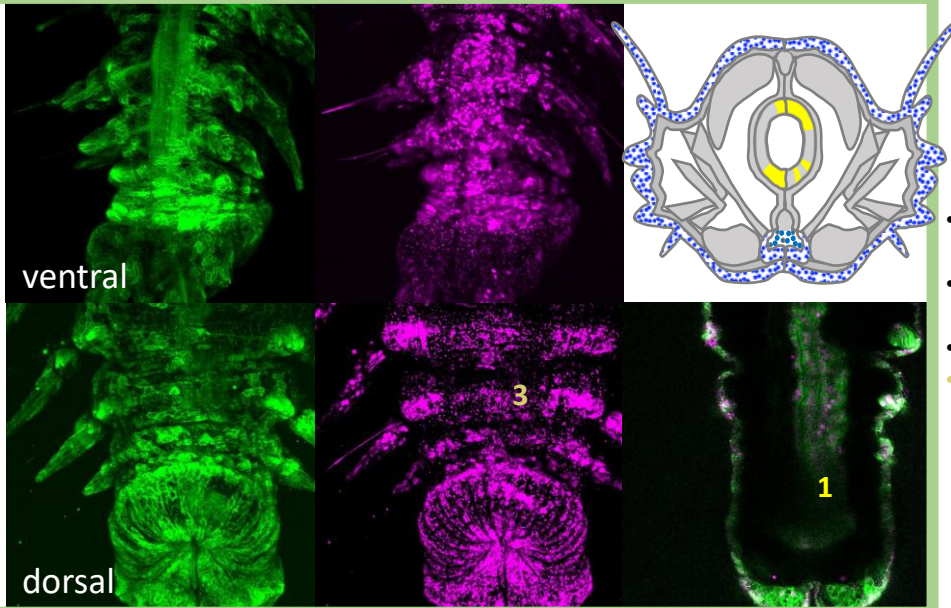

- Segmental ectoderm, variegated
- Pygidium ectoderm, variegated
- Endoderm, partial 1
- Autofluorescent cuticle in segments 3

After 2nd amputation-  
regeneration

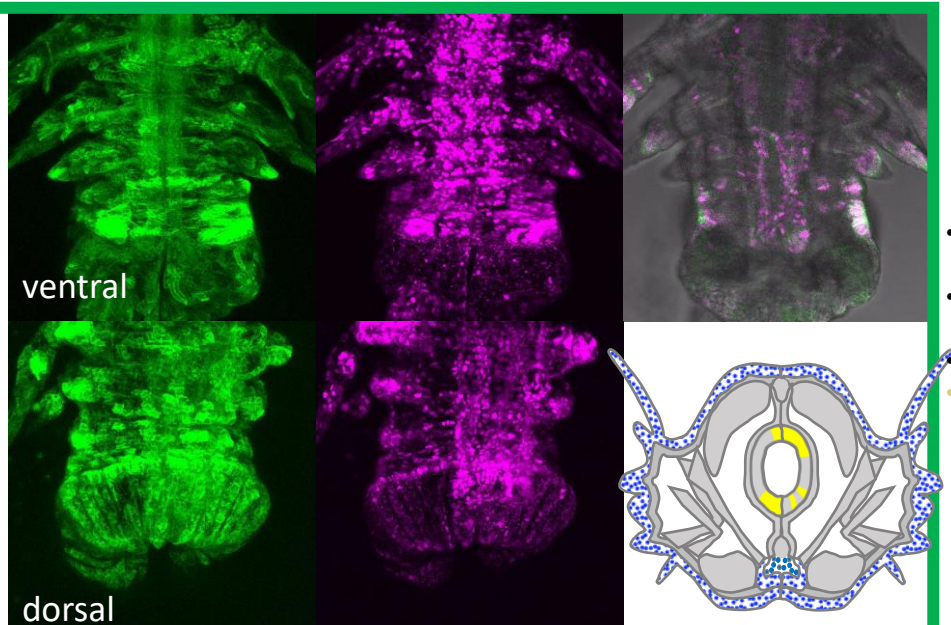

- Segmental ectoderm, variegated
- Pygidium ectoderm, variegated
- Endoderm, partial 1
- Autofluorescent cuticle in segments 3



- ectoderm
- mesoderm
- endoderm

Full Z-projections

Frontal section  
+ transverse scheme

ORIGINAL TAIL  
(no regeneration)

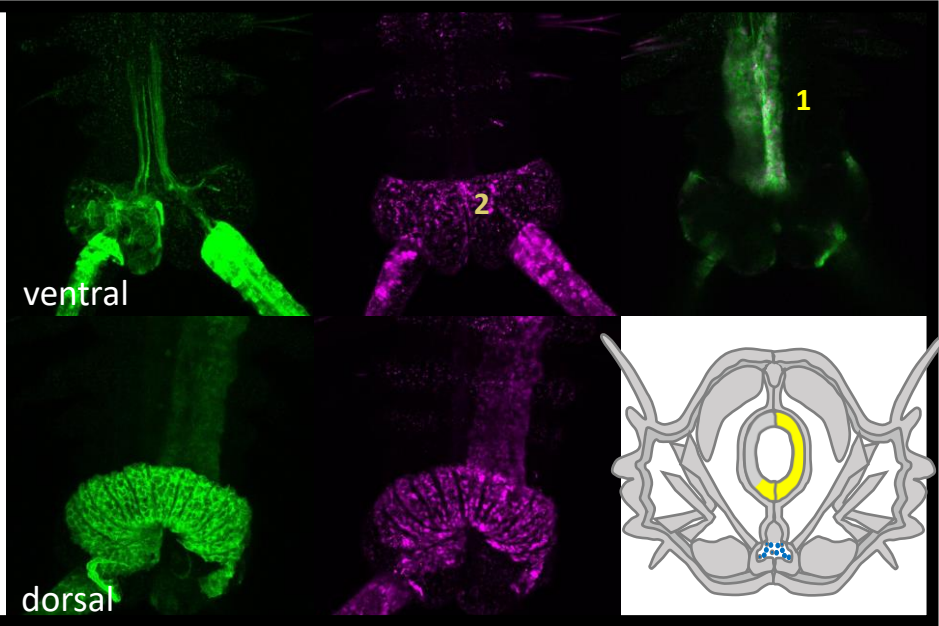

- Pygidium ectoderm, partial
- Endoderm partial 1
- Autofluorescent cuticle in pygidium 2

After 1st amputation-  
regeneration

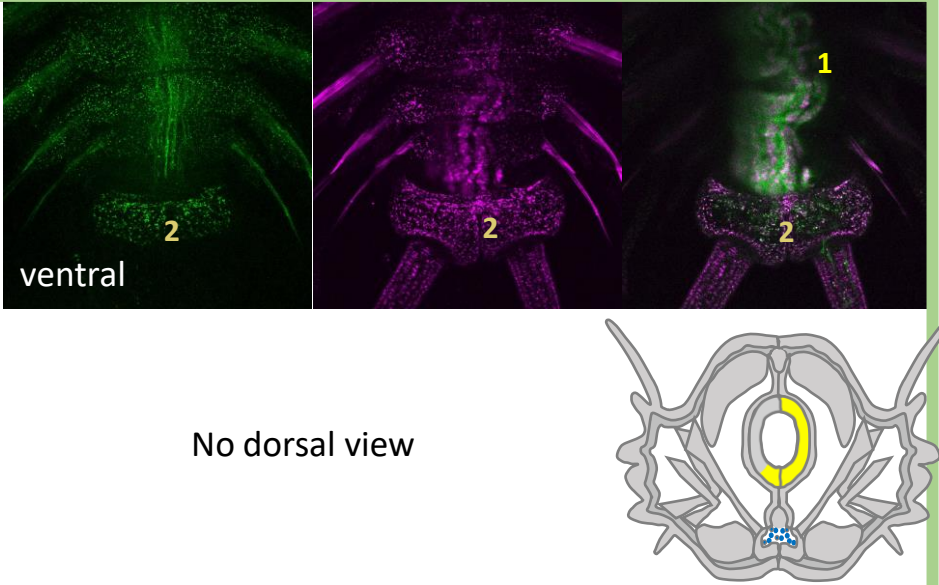

- Endoderm partial 1
- Autofluorescent cuticle in pygidium 2

After 2nd amputation-  
regeneration



Transgenic tissues :

ectoderm

mesoderm

endoderm

- Segmental ectoderm, variegated
- Pygidium ectoderm, partial, variegated

ORIGINAL TAIL  
(no regeneration)

ventral

dorsal

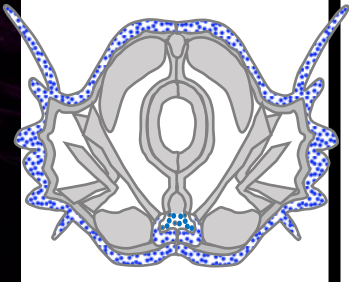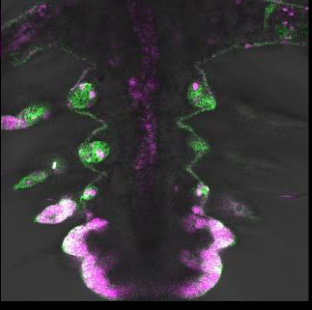

After 1st amputation-  
regeneration

After 2nd amputation-  
regeneration

- ectoderm
- mesoderm
- endoderm

Full Z-projections

Frontal section  
+ transverse scheme

ORIGINAL TAIL  
(no regeneration)

ventral

dorsal

- Segmental ectoderm, variegated
- Pygidium ectoderm, partial

After 1st amputation-  
regeneration

After 2nd amputation-  
regeneration

ventral

dorsal

- Segmental ectoderm, variegated
- Pygidium ectoderm, variegated

- ectoderm
- mesoderm
- endoderm

Full Z-projections

Frontal section  
+ transverse scheme

ORIGINAL TAIL  
(no regeneration)

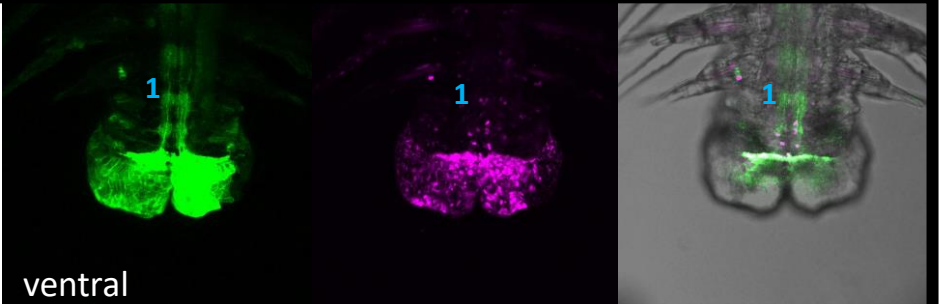

No dorsal view

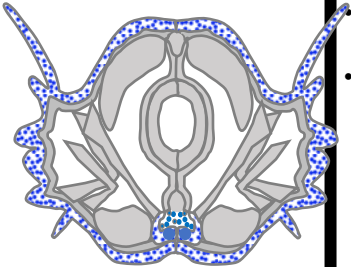

- Segmental ectoderm, variegated, weak
- Pygidium ectoderm, partial
- Median neural lineage

After 1st amputation-  
regeneration

After 2nd amputation-  
regeneration

- ectoderm
- mesoderm
- endoderm

Full Z-projections

Frontal section  
+ transverse scheme

ORIGINAL TAIL  
(no regeneration)

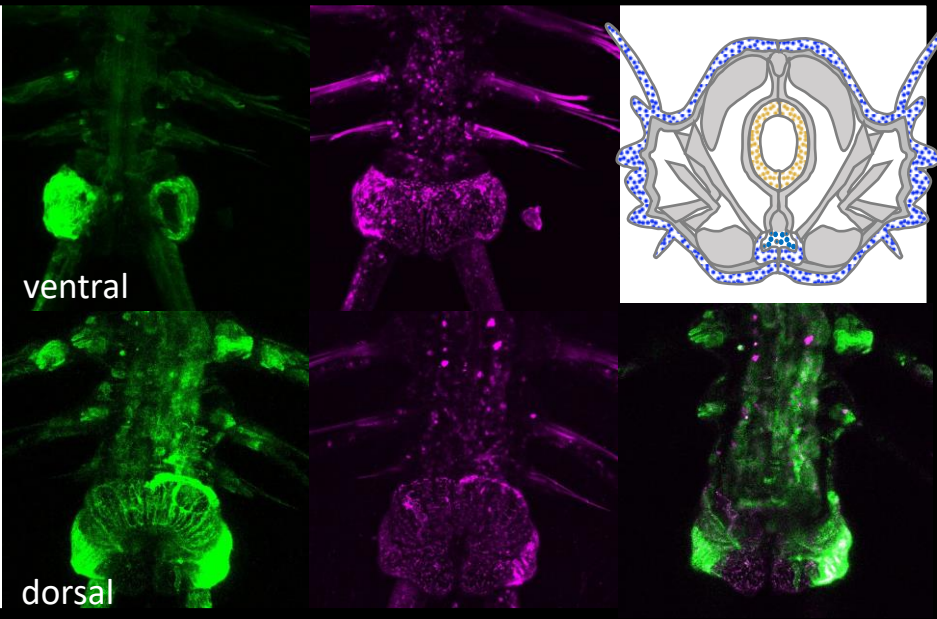

- Segmental ectoderm, variegated, weak
- Pygidium ectoderm, partial
- Gut endoderm, variegated

After 1st amputation-  
regeneration

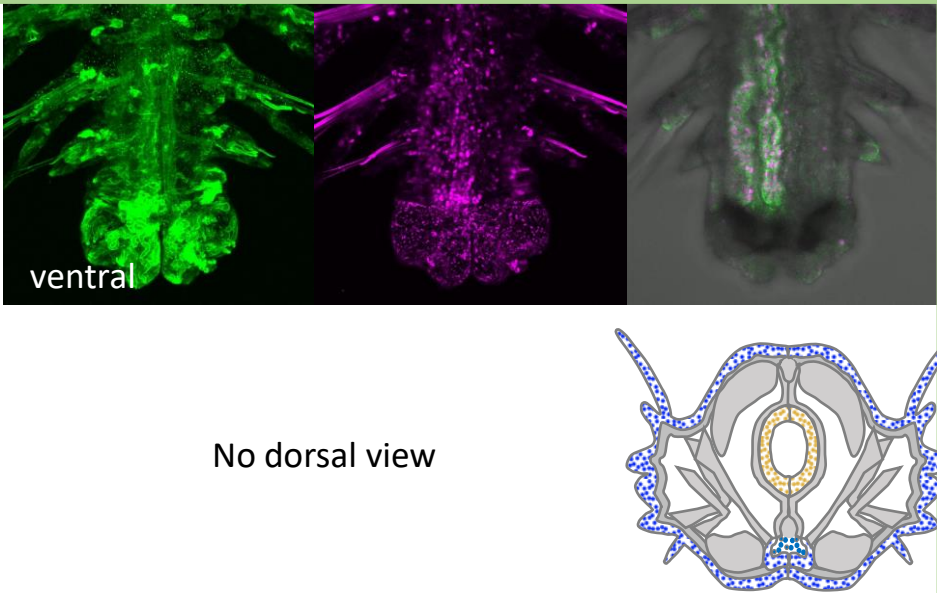

- Segmental ectoderm, variegated
- Pygidium ectoderm, variegated
- Gut endoderm, variegated

After 2nd amputation-  
regeneration

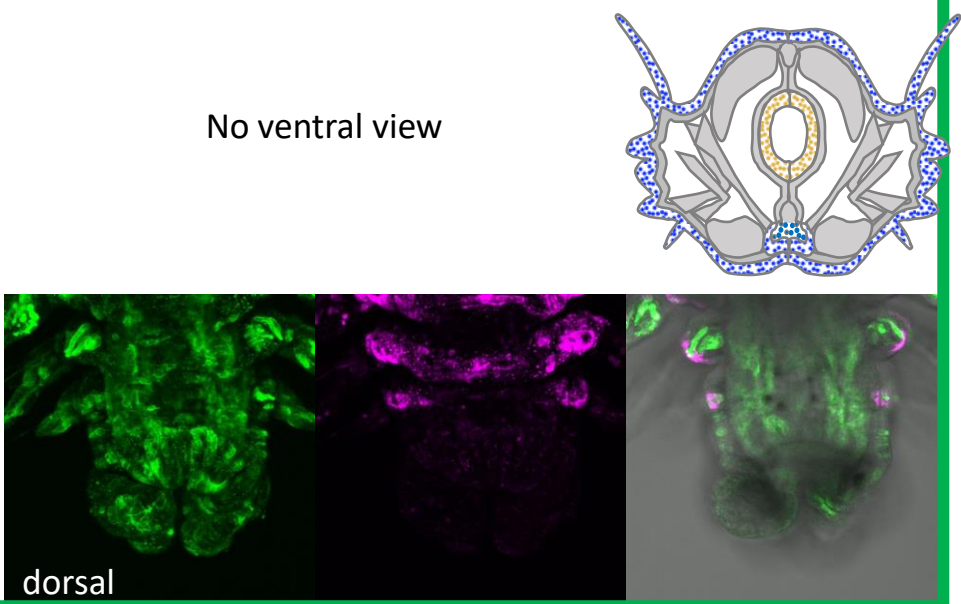

- Segmental ectoderm, variegated
- Pygidium ectoderm, variegated
- Gut endoderm, variegated



- ectoderm
- mesoderm
- endoderm

Full Z-projections

Frontal section  
+ transverse scheme

ORIGINAL TAIL  
(no regeneration)

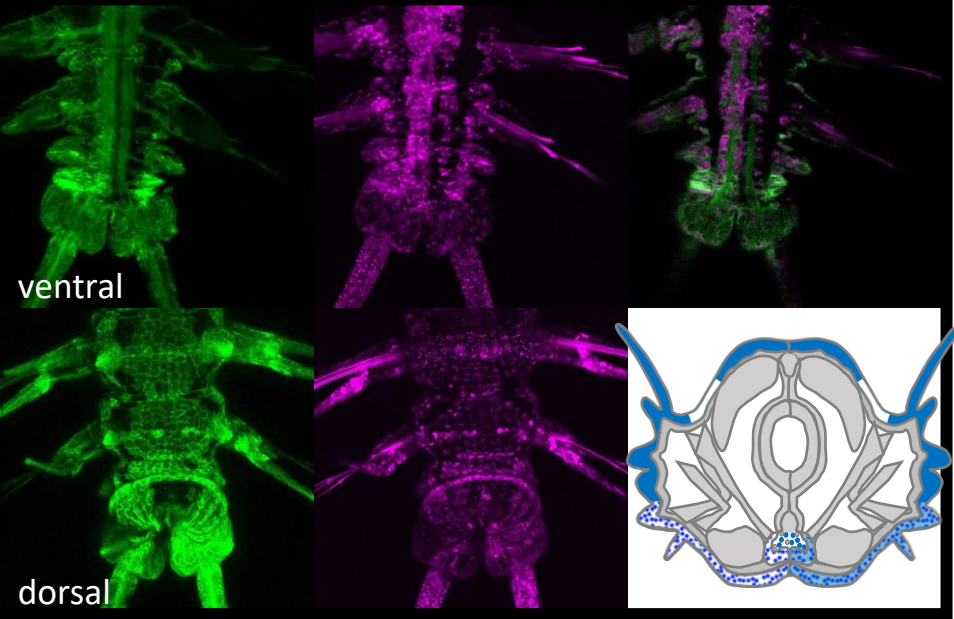

- Segmental ectoderm, variegated ventrally, partial dorsally
- Pygidium ectoderm, partial

After 1st amputation-  
regeneration

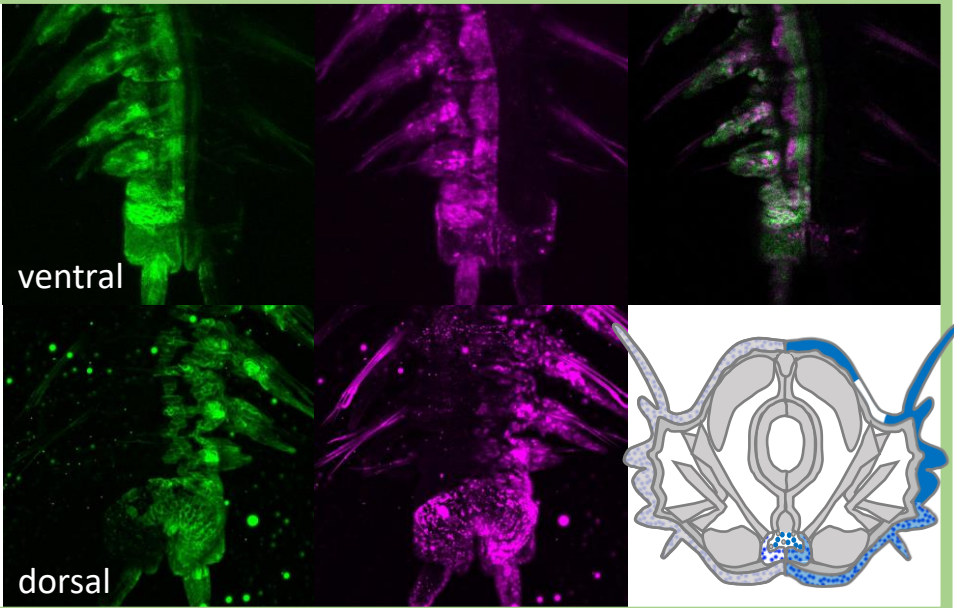

- Segmental ectoderm, partial and variegated, right side, very weak, left side
- Pygidium ectoderm, partial and variegated

After 2nd amputation-  
regeneration

Full Z-projections

Frontal section  
+ transverse scheme

- ectoderm
- mesoderm
- endoderm

No ventral view

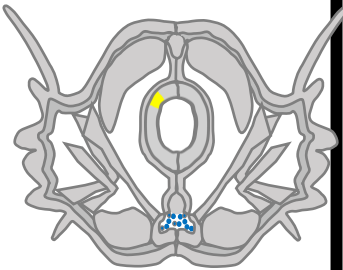

ORIGINAL TAIL  
(no regeneration)

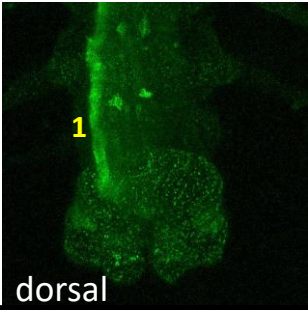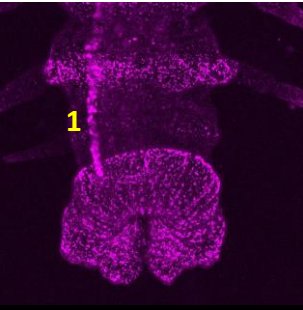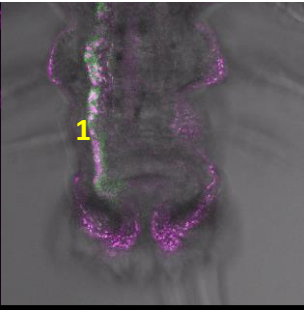

- Gut endoderm, partial  
**1**

After 1st amputation-  
regeneration

After 2nd amputation-  
regeneration

- ectoderm
- mesoderm
- endoderm

ORIGINAL TAIL  
(no regeneration)

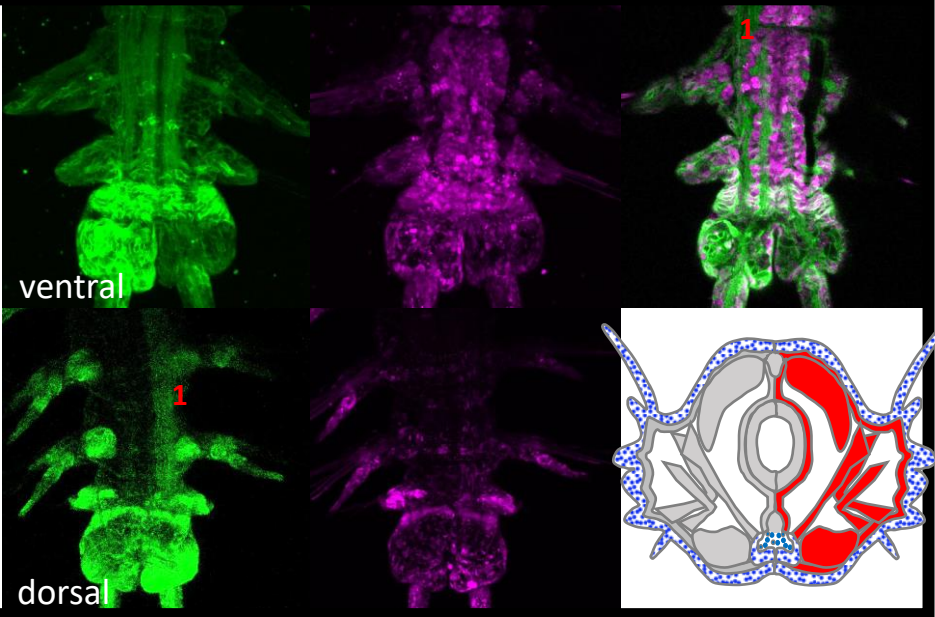

- Pygidium ectoderm, stronger on right side
- Segmental ectoderm, variegated
- Right side mesoderm

After 1st amputation-  
regeneration

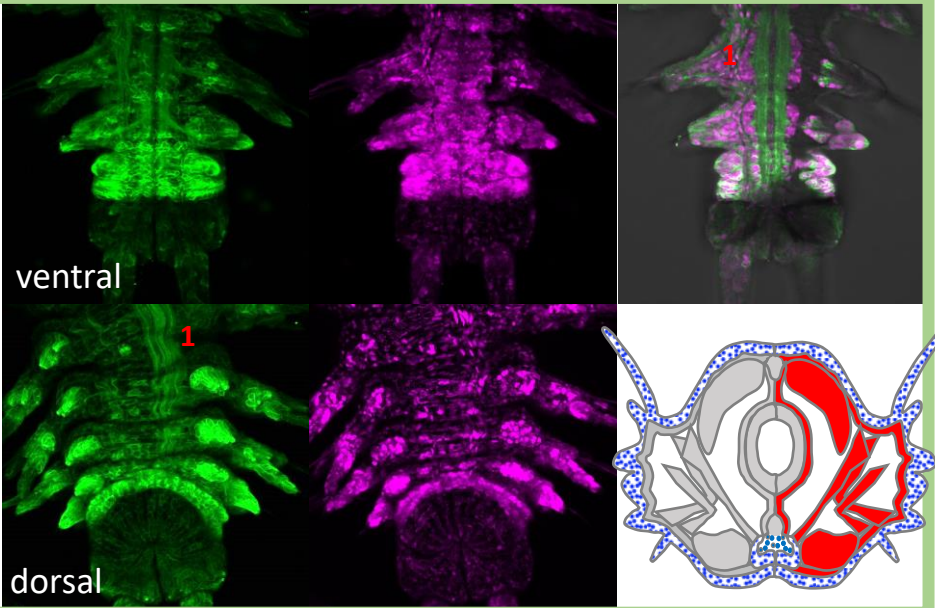

- Pygidium ectoderm, weak
- Segmental ectoderm, variegated
- Right side mesoderm

After 2nd amputation-  
regeneration

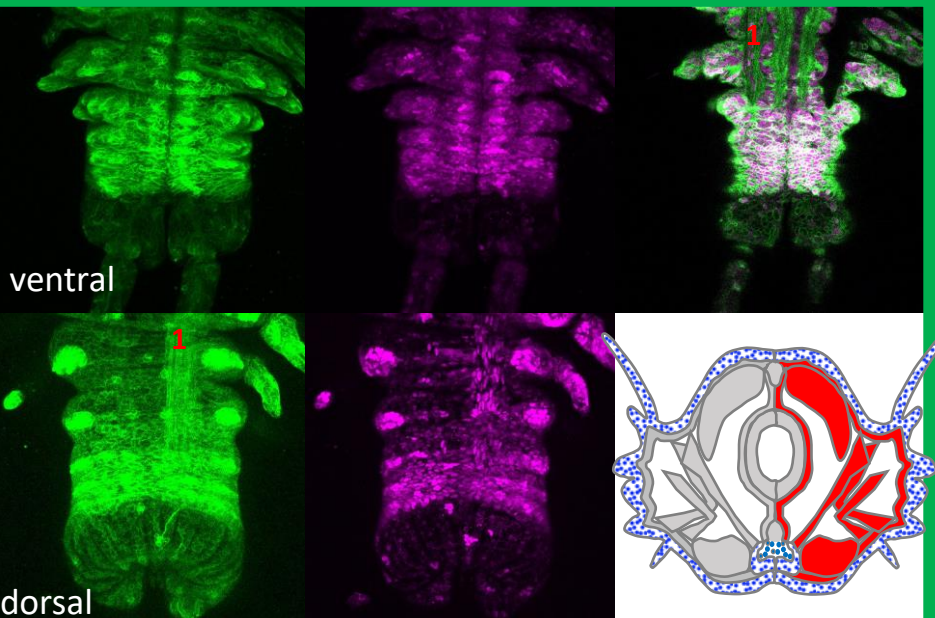

- Pygidium ectoderm, weak
- Segmental ectoderm, variegated
- Right side mesoderm



- ectoderm
- mesoderm
- endoderm

Full Z-projections

Frontal section  
+ transverse scheme

ORIGINAL TAIL  
(no regeneration)

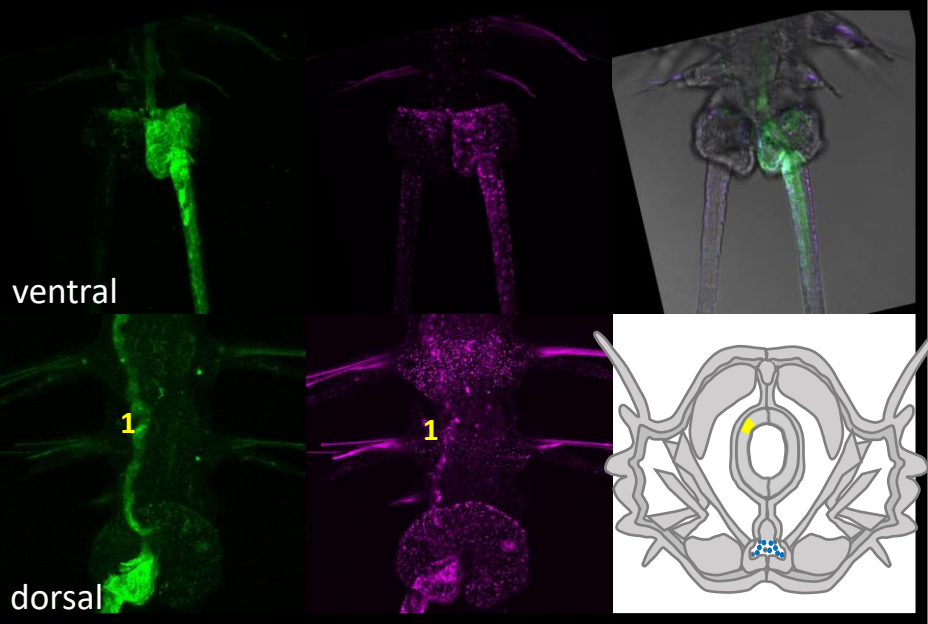

- Pygidium ectoderm , partial
- Gut endoderm, partial

After 1st amputation-  
regeneration

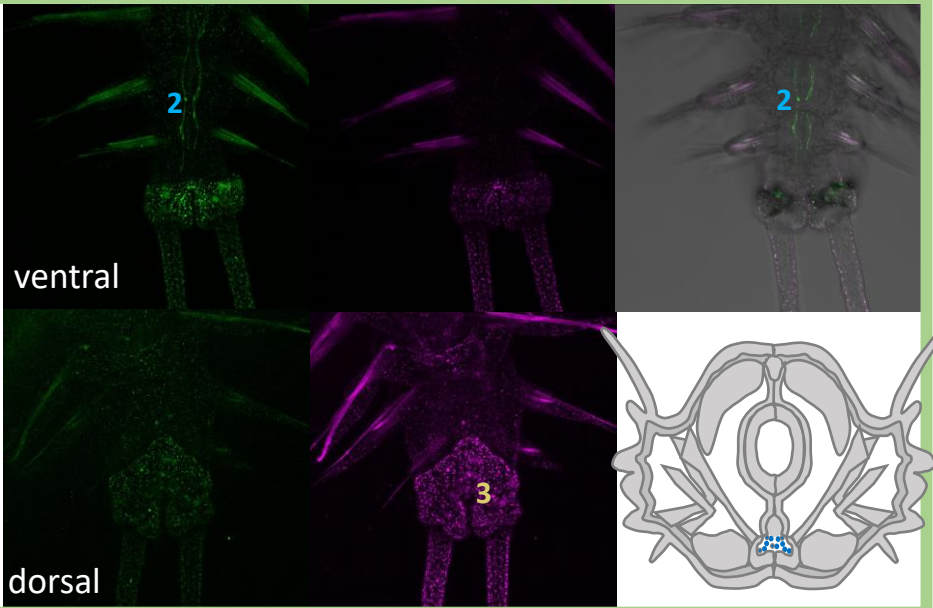

- Brain nerves 2
- Autofluorescent cuticle in pygidium 3

After 2nd amputation-  
regeneration



- ectoderm
- mesoderm
- endoderm

Full Z-projections

Frontal section  
+ transverse scheme

ORIGINAL TAIL  
(no regeneration)

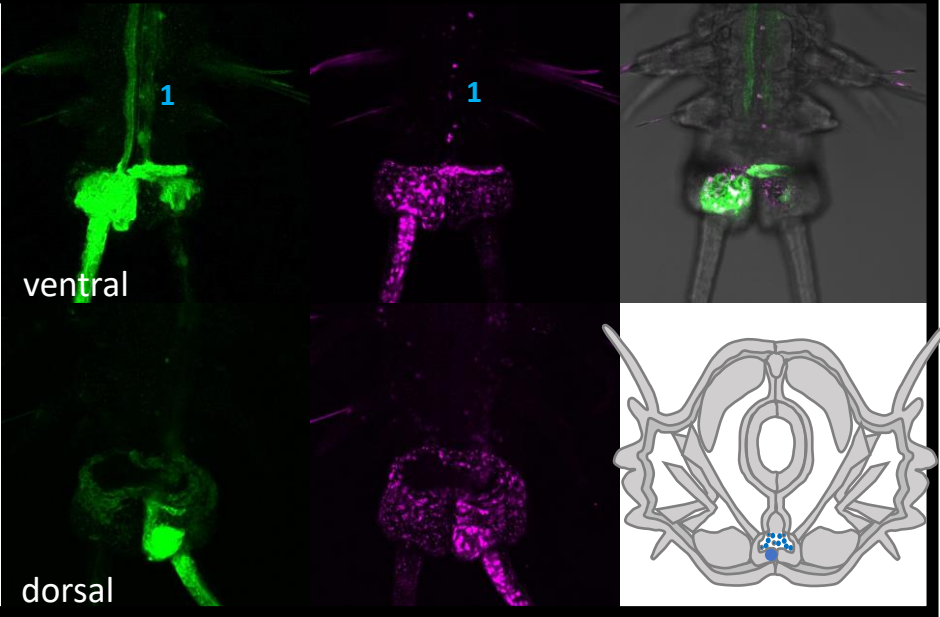

- Pygidium ectoderm, partial
- Median neural lineage, left side **1**

After 1st amputation-  
regeneration

No ventral view

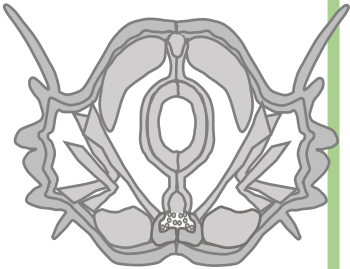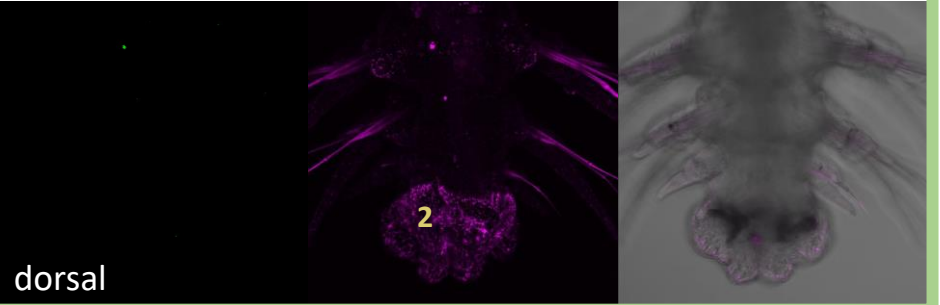

- Autofluorescent cuticle in pygidium **2**

After 2nd amputation-  
regeneration

- ectoderm
- mesoderm
- endoderm

Full Z-projections

Frontal section  
+ transverse scheme

ORIGINAL TAIL  
(no regeneration)

ventral

dorsal

- Pygidium ectoderm, partial

After 1st amputation-  
regeneration

After 2nd amputation-  
regeneration

- ectoderm
- mesoderm
- endoderm

Full Z-projections

Frontal section  
+ transverse scheme

ORIGINAL TAIL  
(no regeneration)

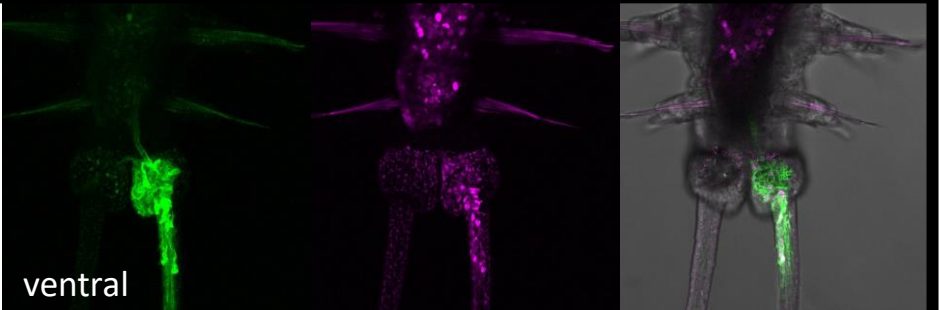

No dorsal view

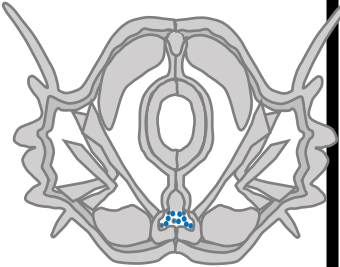

- Pygidium ectoderm, partial

After 1st amputation-  
regeneration

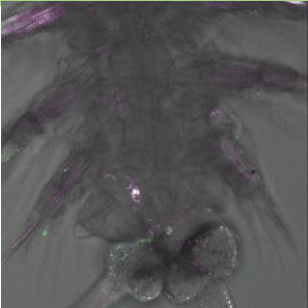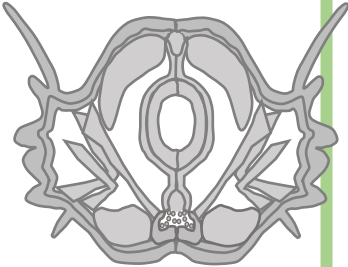

After 2nd amputation-  
regeneration



- ectoderm
- mesoderm
- endoderm

Full Z-projections

Frontal section  
+ transverse scheme

ORIGINAL TAIL  
(no regeneration)

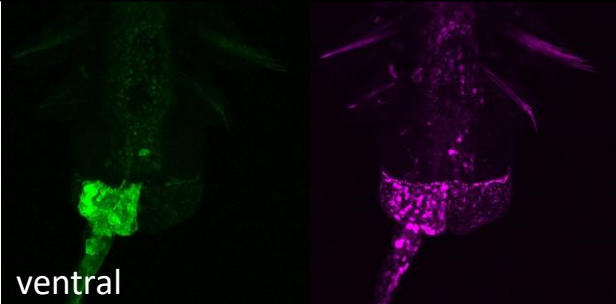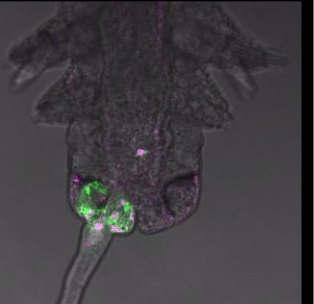

No dorsal view

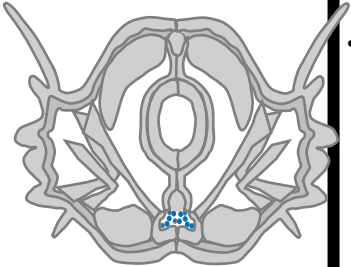

- Pygidium ectoderm, partial
- Gut endoderm, variegated

After 1st amputation-  
regeneration

After 2nd amputation-  
regeneration

membranes  
nuclei

N01

Full Z-projections

Frontal section  
+ transverse scheme

Transgenic tissues :

- ectoderm
- mesoderm
- endoderm

ORIGINAL TAIL  
(no regeneration)

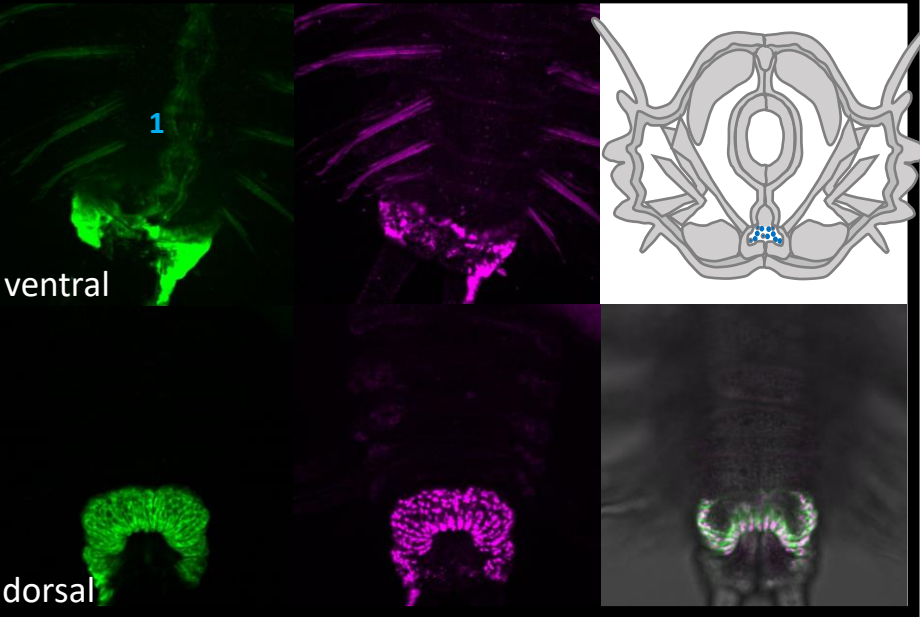

- Pygidium ectoderm, partial
- Brain neurites **1**

After 1st amputation-  
regeneration

After 2nd amputation-  
regeneration

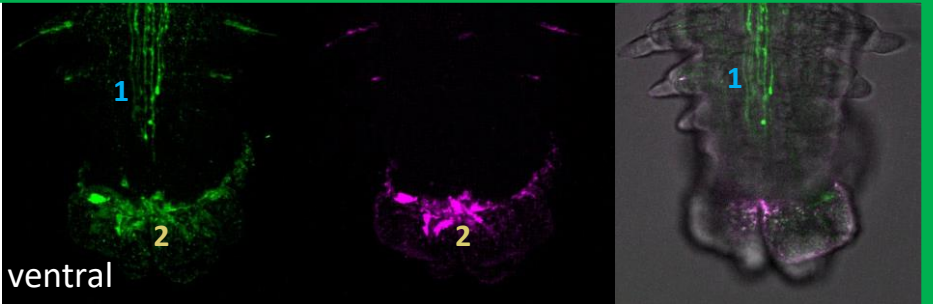

No dorsal view

- Brain neurites
- Autofluorescent cuticle in pygidium **2**

## Full Z-projections

## Frontal section + transverse scheme

 **ectoderm**

 **mesoderm**

 **endoderm**

ORIGINAL TAIL  
(no regeneration)

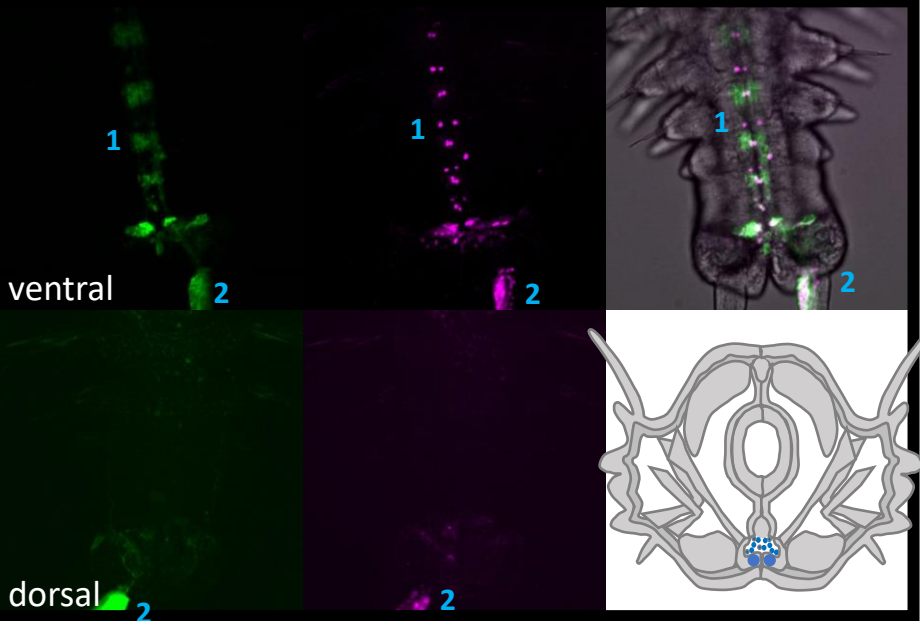

- Bilateral median neural lineage **1**
- Left pygidium **2**

## After 1st amputation- regeneration

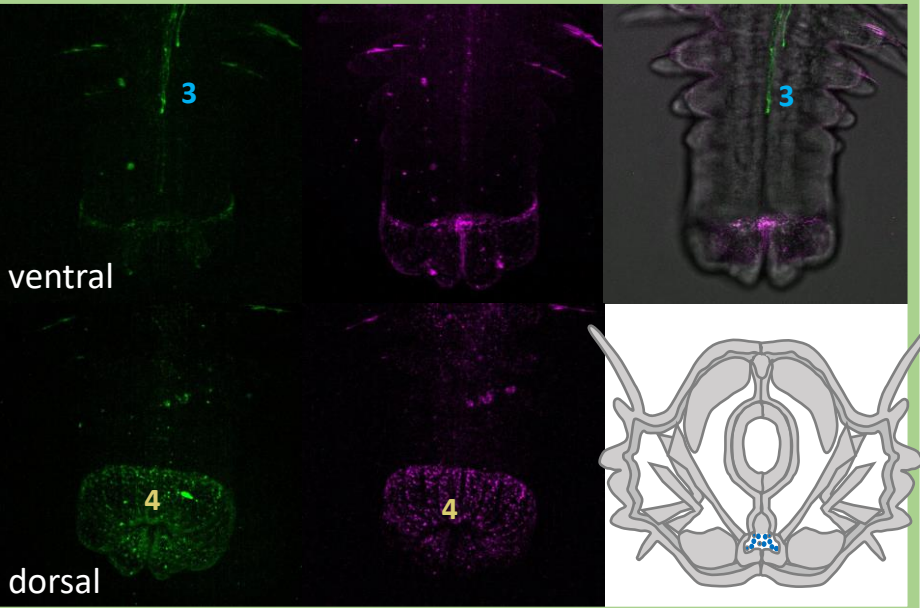

- **Brain neurites** **3**
- **Autofluorescent cuticle in pygidium** **4**

After 2nd amputation-  
regeneration



- ectoderm
- mesoderm
- endoderm

Full Z-projections

Frontal section  
+ transverse scheme

ORIGINAL TAIL  
(no regeneration)

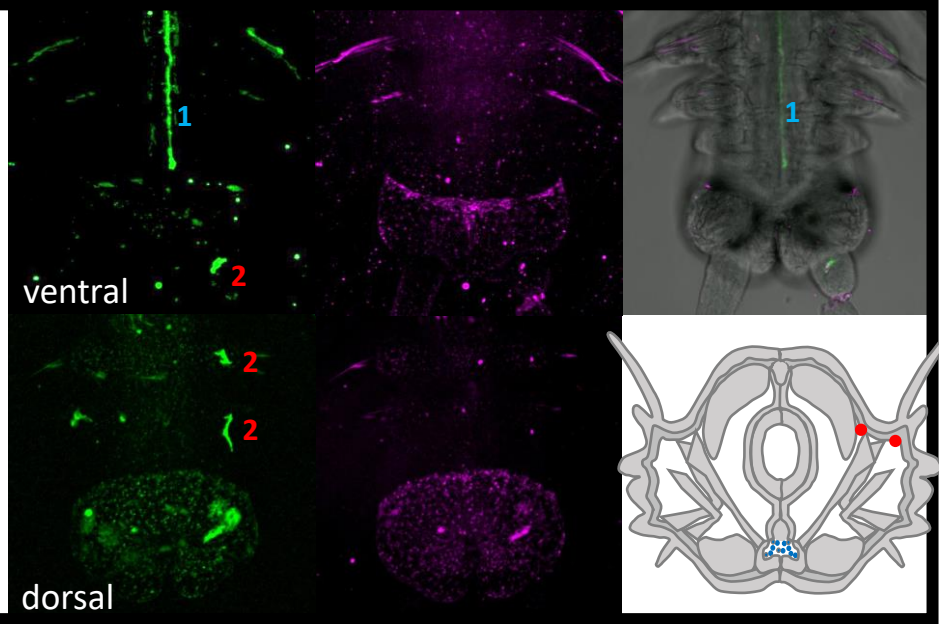

- Brain neurites 1
- Amoeboid cells 2

After 1st amputation-  
regeneration

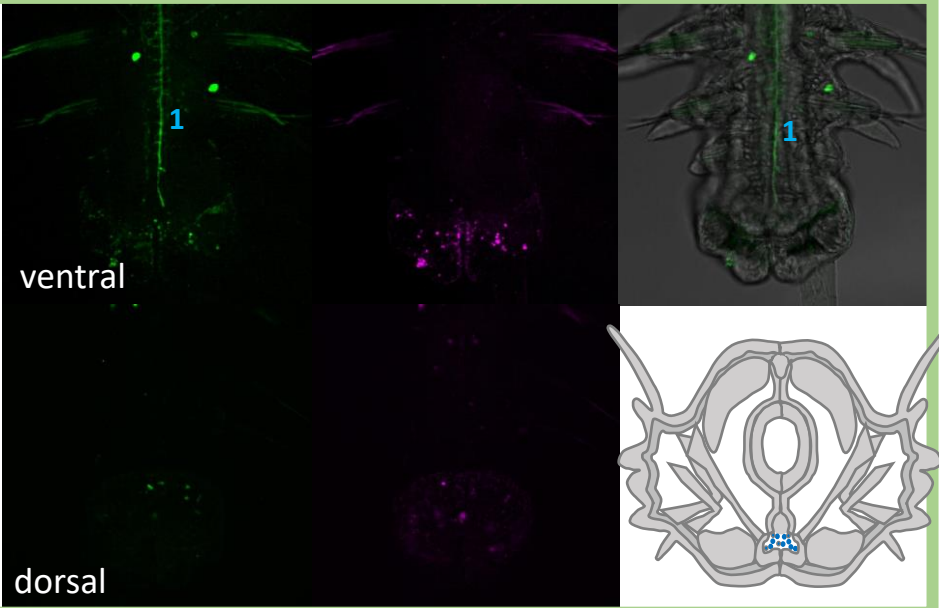

- Brain neurites 1

After 2nd amputation-  
regeneration

- ectoderm
- mesoderm
- endoderm

ORIGINAL TAIL  
(no regeneration)

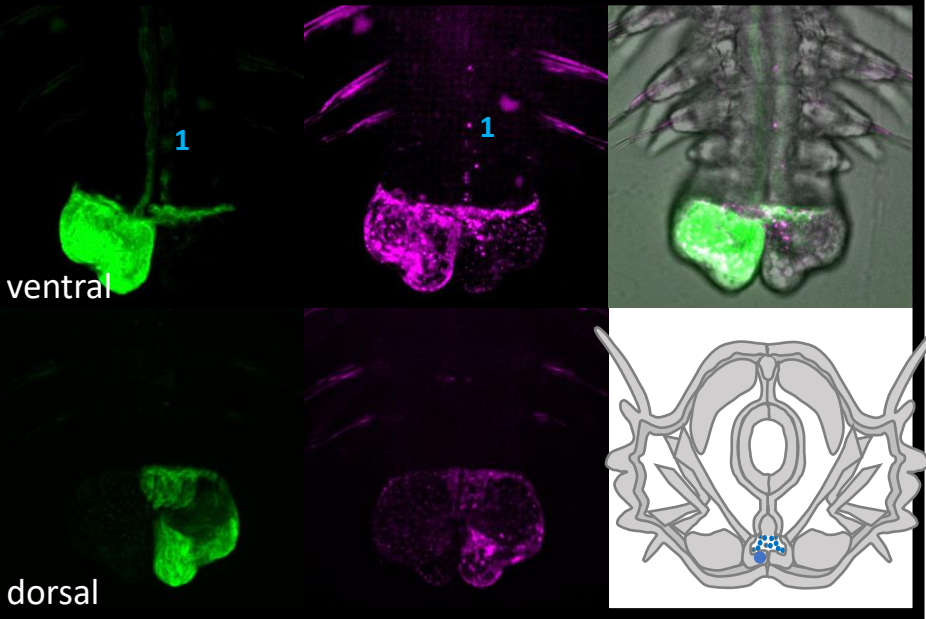

After 1st amputation-  
regeneration

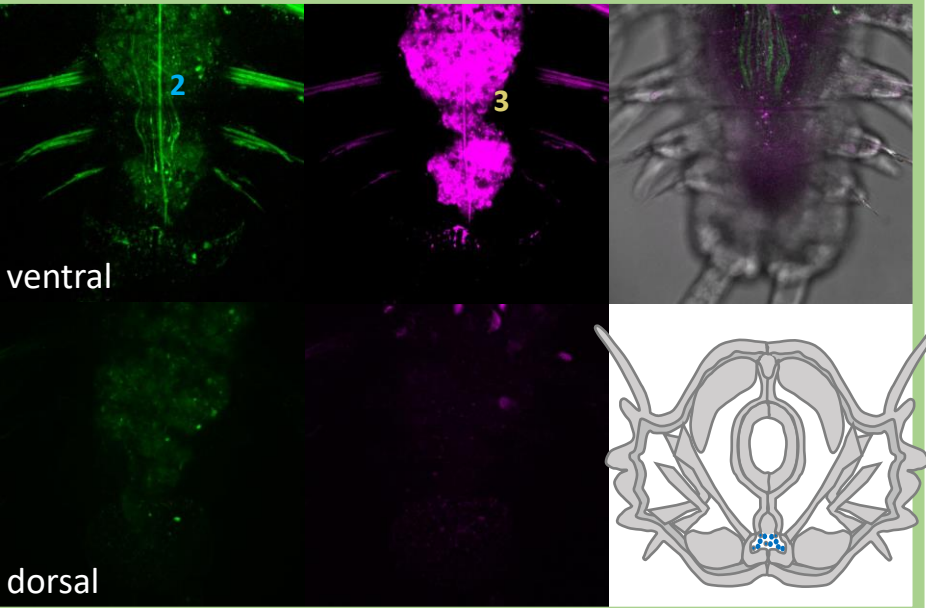

After 2nd amputation-  
regeneration

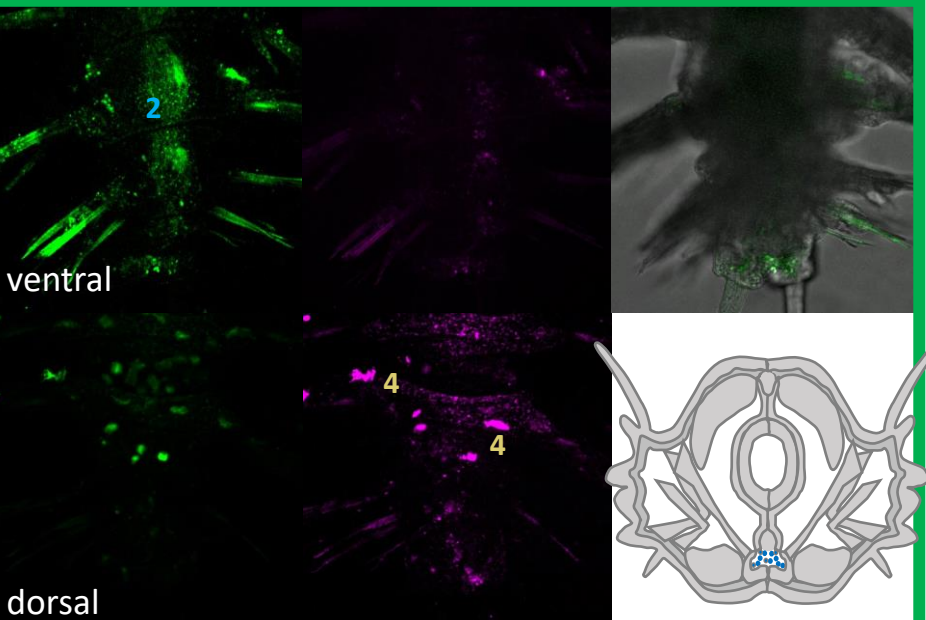

- ectoderm
- mesoderm
- endoderm

Full Z-projections

Frontal section  
+ transverse scheme

ORIGINAL TAIL  
(no regeneration)

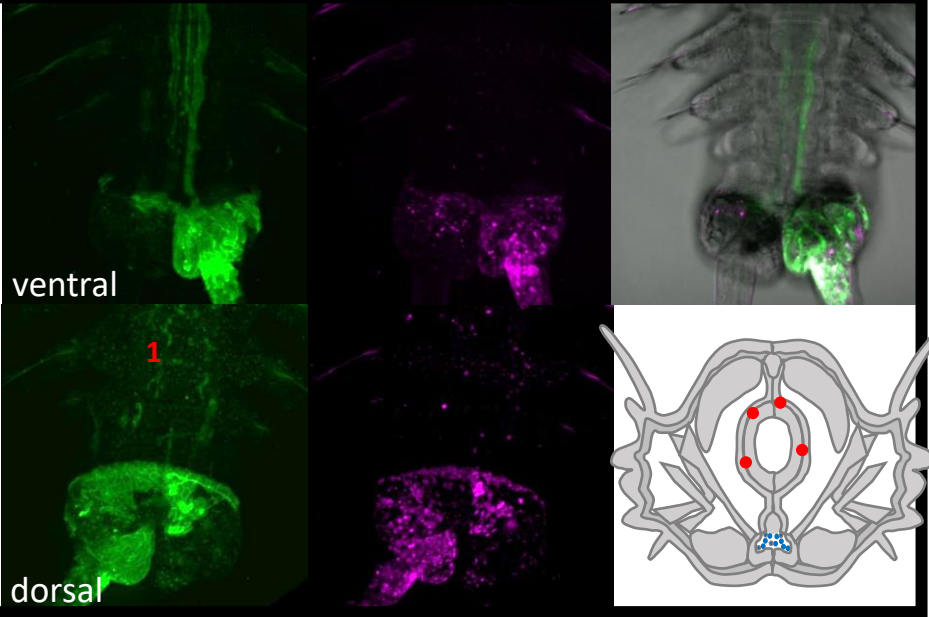

- Pygidium ectoderm, partial
- Amoeboid cells 1

After 1st amputation-  
regeneration

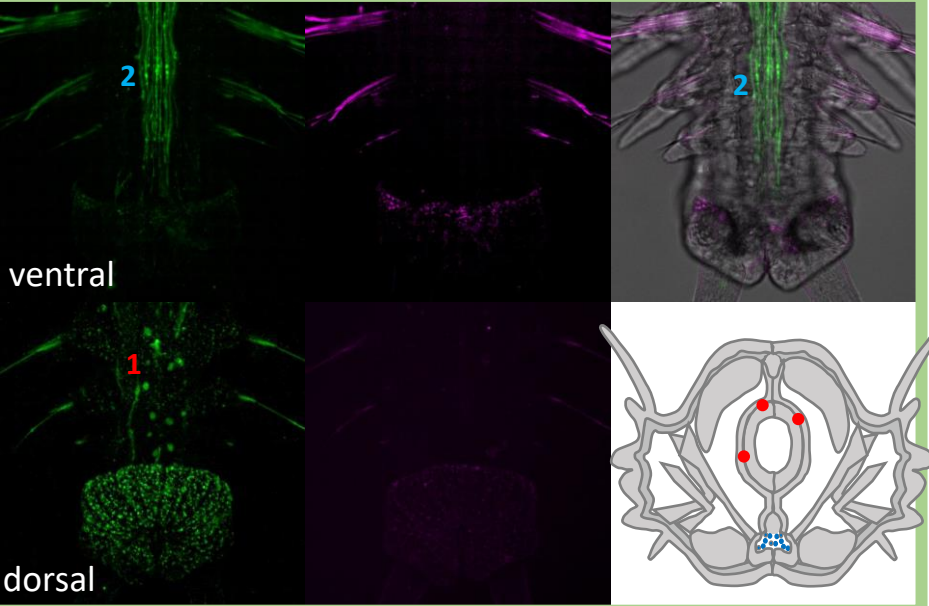

- Amoeboid cells 1
- Brain neurites 2

After 2nd amputation-  
regeneration



- ectoderm
- mesoderm
- endoderm

ORIGINAL TAIL  
(no regeneration)

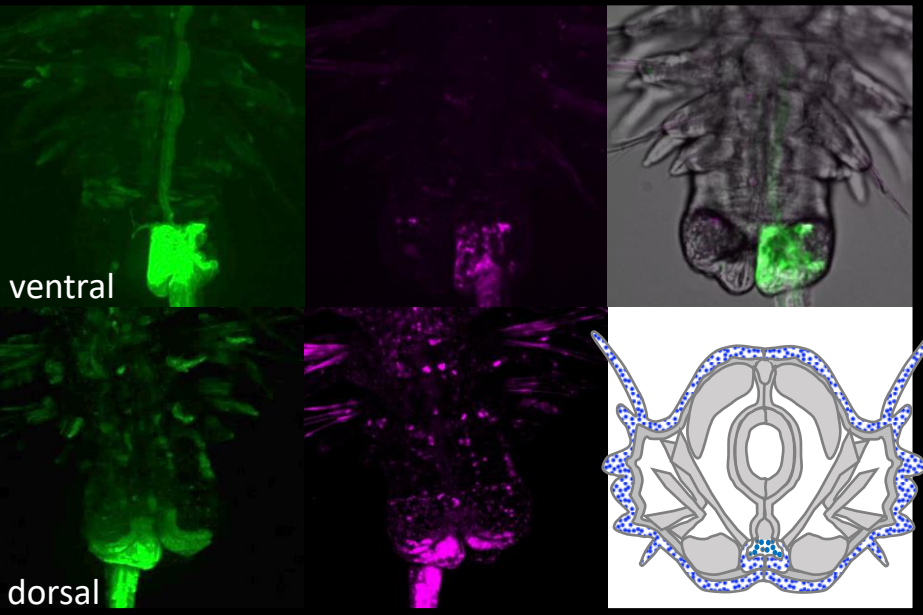

- Pygidium ectoderm left side
- Segmental ectoderm, very weak and patchy

After 1st amputation-  
regeneration

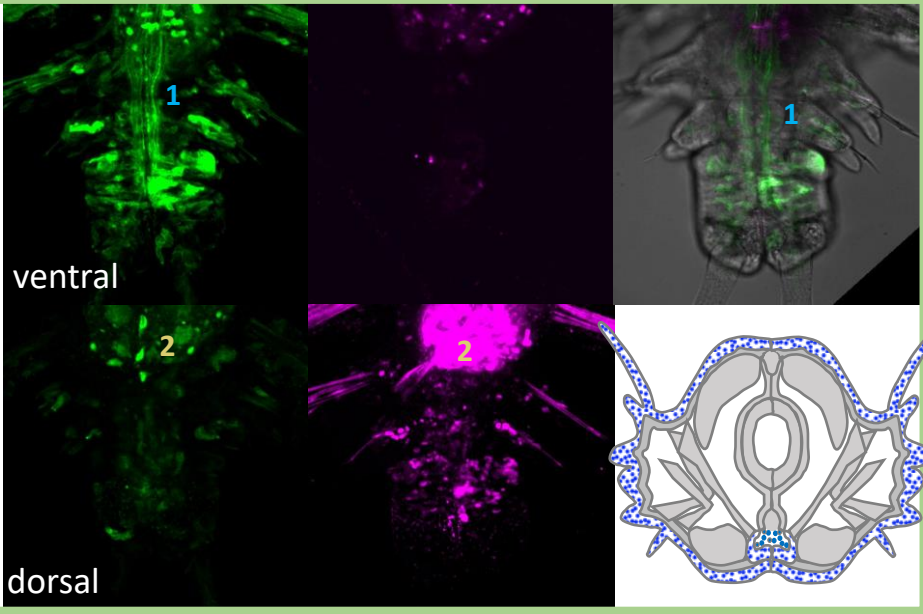

- Segmental ectoderm, very weak and patchy
- Pygidium ectoderm, weak and patchy
- Brain neurites 1
- Autofluorescent gut content 2

After 2nd amputation-  
regeneration

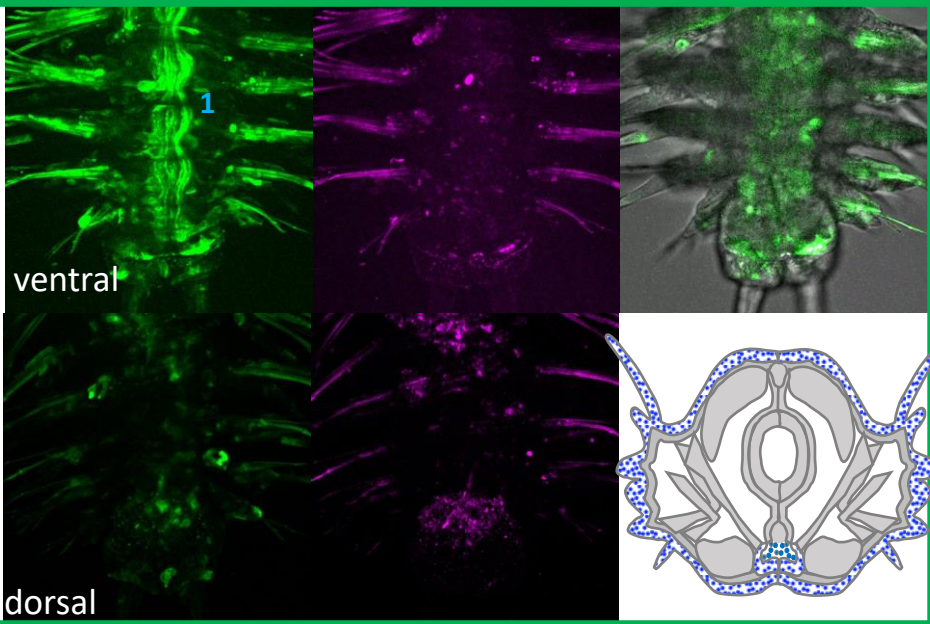

- Segmental ectoderm, very weak and patchy
- Pygidium ectoderm, weak and patchy
- Brain neurites 1

- ectoderm
- mesoderm
- endoderm

ORIGINAL TAIL  
(no regeneration)

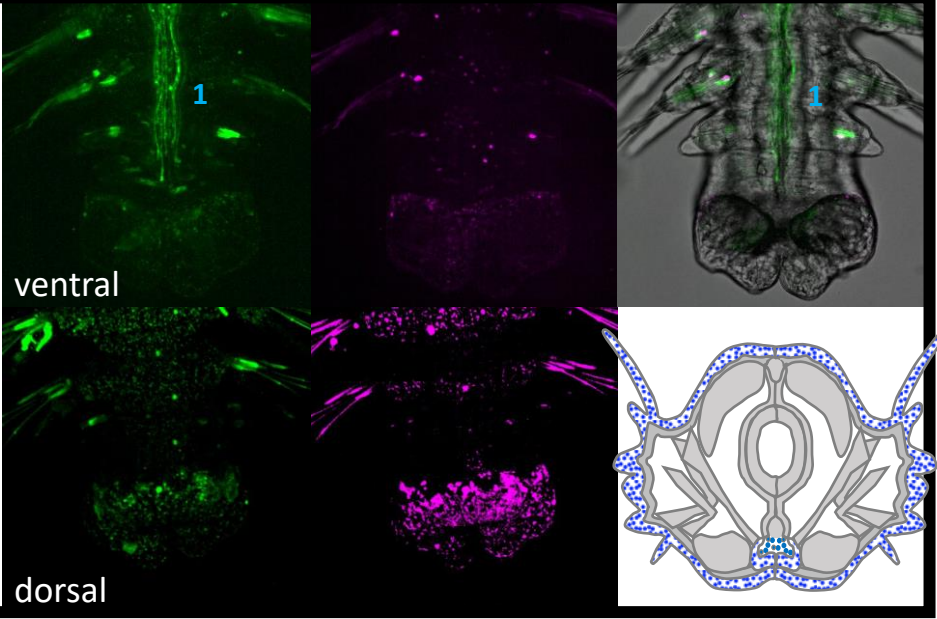

- Segmental ectoderm, very weak and patchy
- Brain neurites **1**
- Autofluorescent cuticle in pygidium **2**

After 1st amputation-  
regeneration

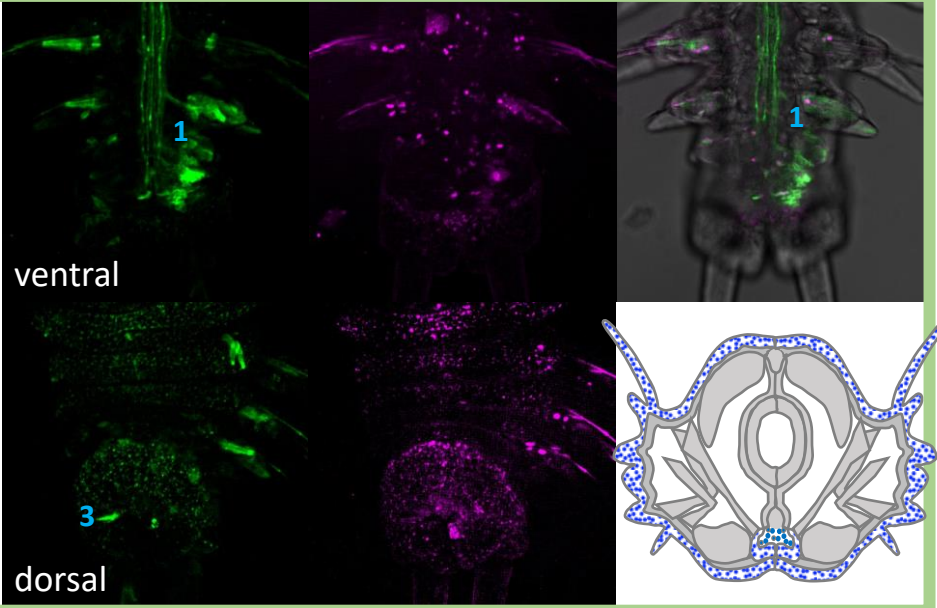

- Segmental ectoderm, very weak and patchy
- Pygidium ectoderm, weak and patchy **3**
- Brain neurites **1**

After 2nd amputation-  
regeneration

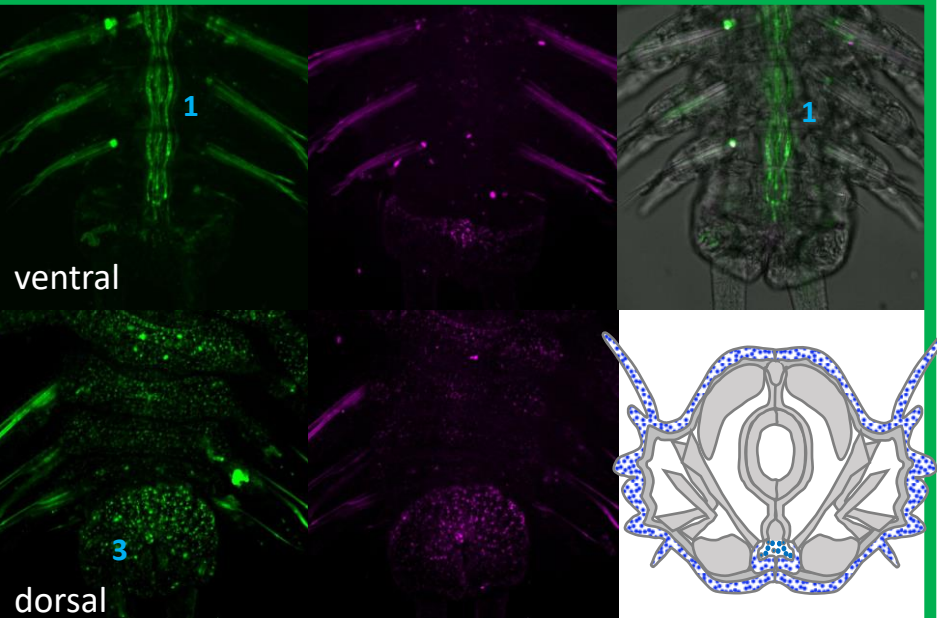

- Segmental ectoderm, very weak and patchy
- Pygidium ectoderm, weak and patchy **3**
- Brain neurites **1**



- ectoderm
- mesoderm
- endoderm

Full Z-projections

Frontal section  
+ transverse scheme

ORIGINAL TAIL  
(no regeneration)

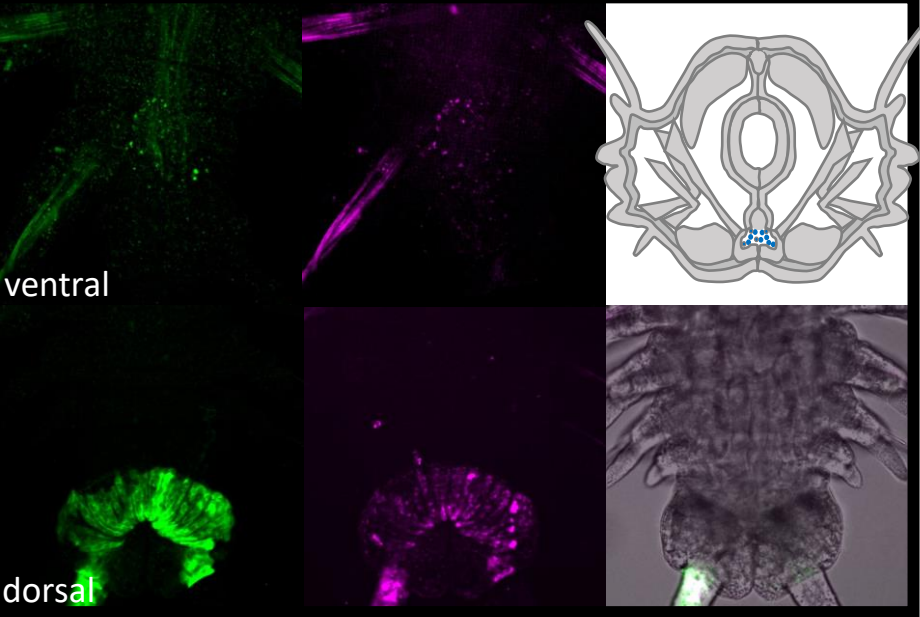

After 1st amputation-  
regeneration

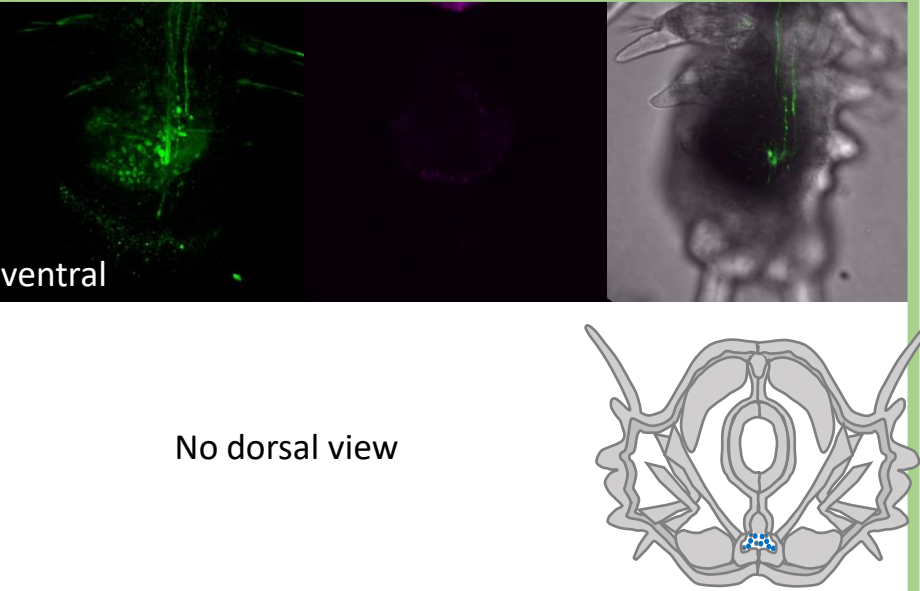

After 2nd amputation-  
regeneration



- ectoderm
- mesoderm
- endoderm

ORIGINAL TAIL  
(no regeneration)

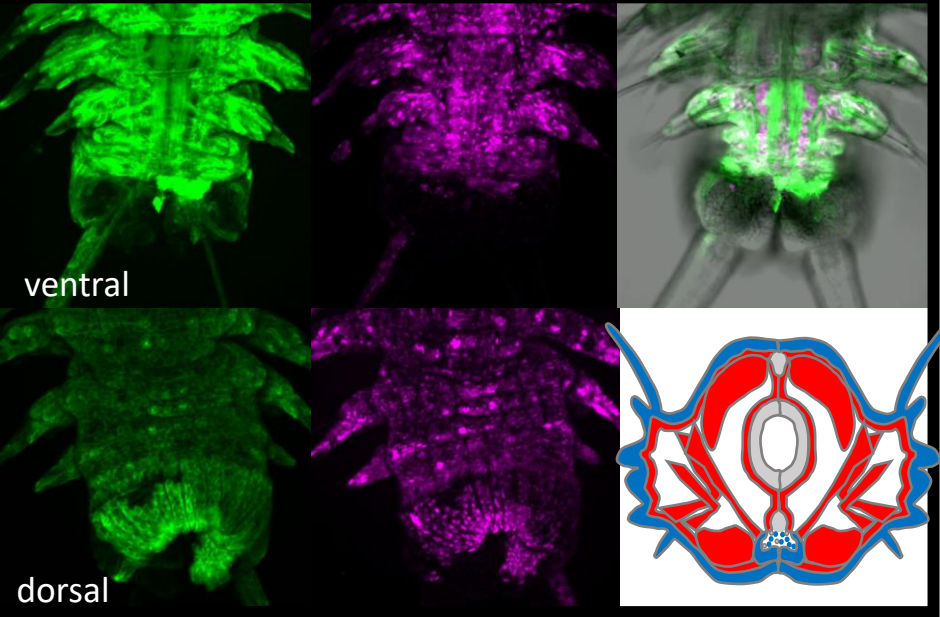

After 1st amputation-  
regeneration

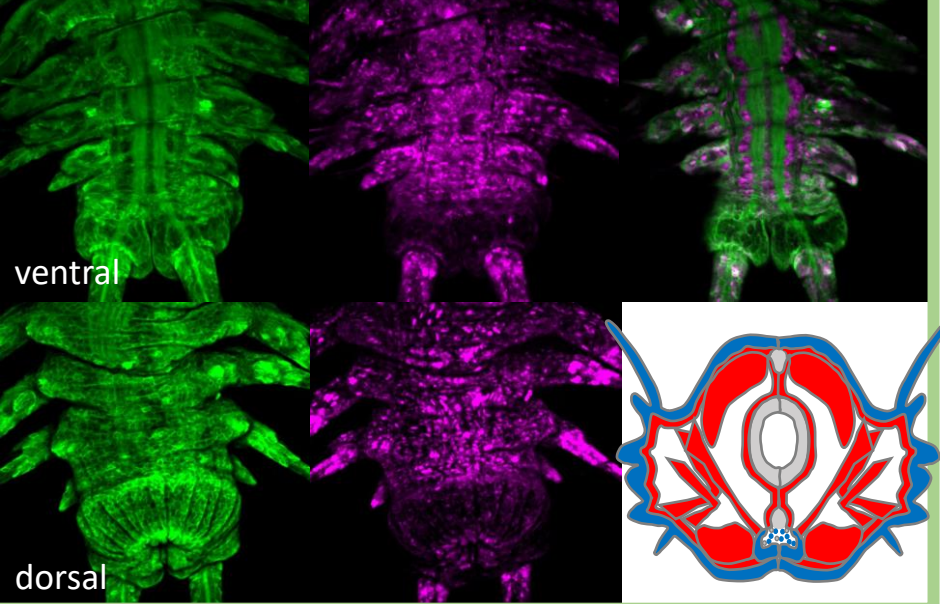

After 2nd amputation-  
regeneration

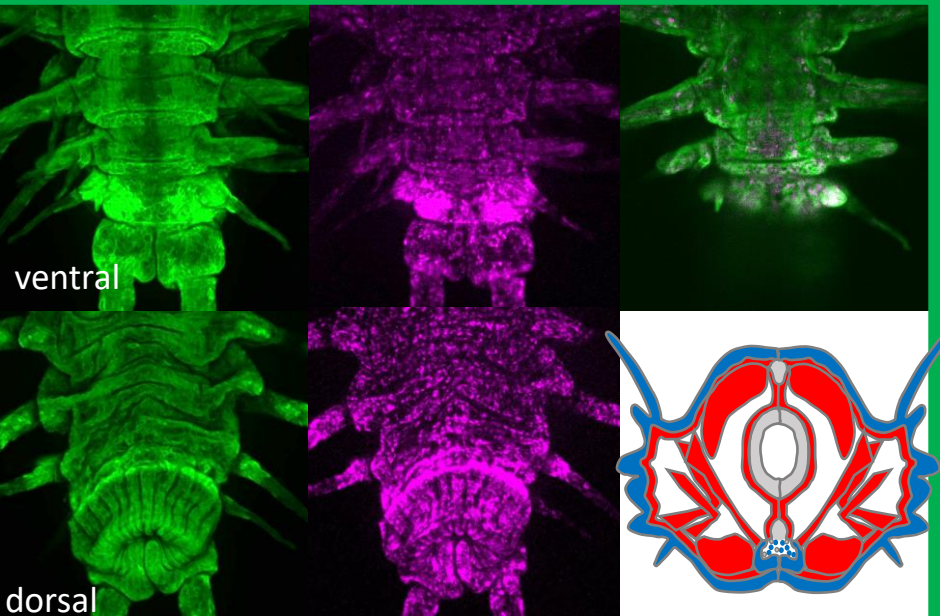

- ectoderm
- mesoderm
- endoderm

Full Z-projections

Frontal section  
+ transverse scheme

ORIGINAL TAIL  
(no regeneration)

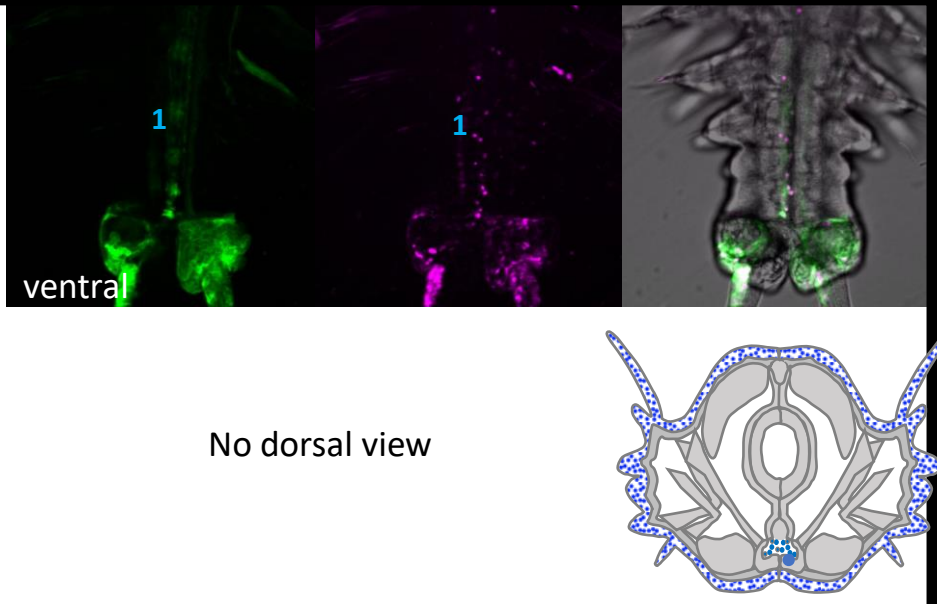

- Pygidium ectoderm
- Segmental ectoderm, very weak and variegated
- Right median neural lineage 1

After 1st amputation-  
regeneration

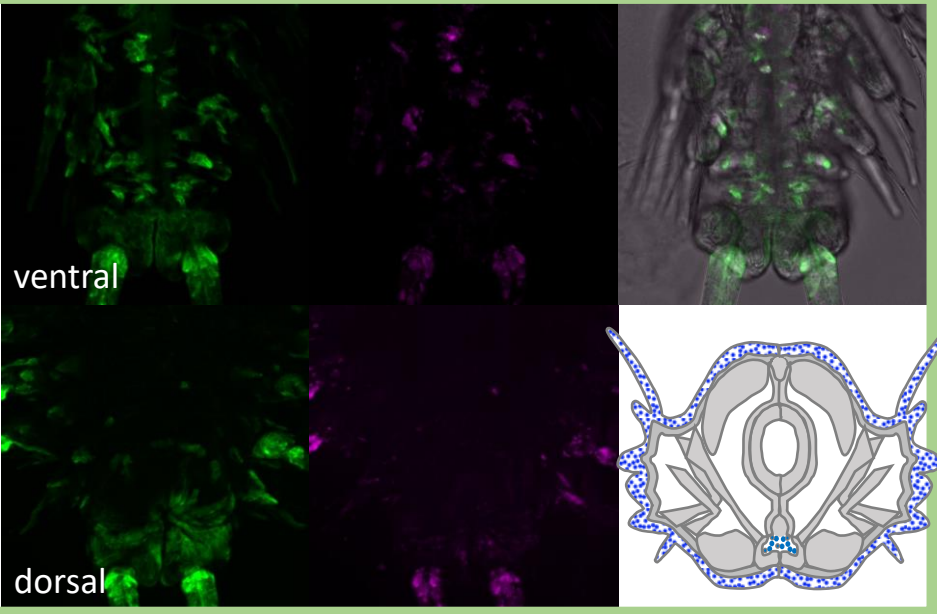

- Pygidium ectoderm, variegated
- Segmental ectoderm, variegated

After 2nd amputation-  
regeneration

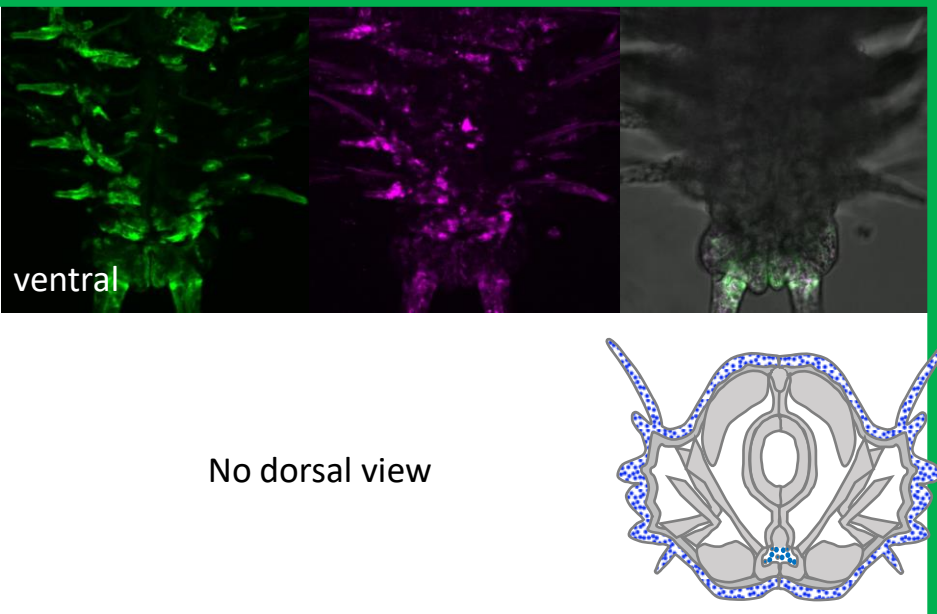

- Pygidium ectoderm, variegated
- Segmental ectoderm, variegated



membranes  
nuclei

N11

Full Z-projections

Frontal section  
+ transverse scheme

Transgenic tissues :

- ectoderm
- mesoderm
- endoderm

ORIGINAL TAIL  
(no regeneration)

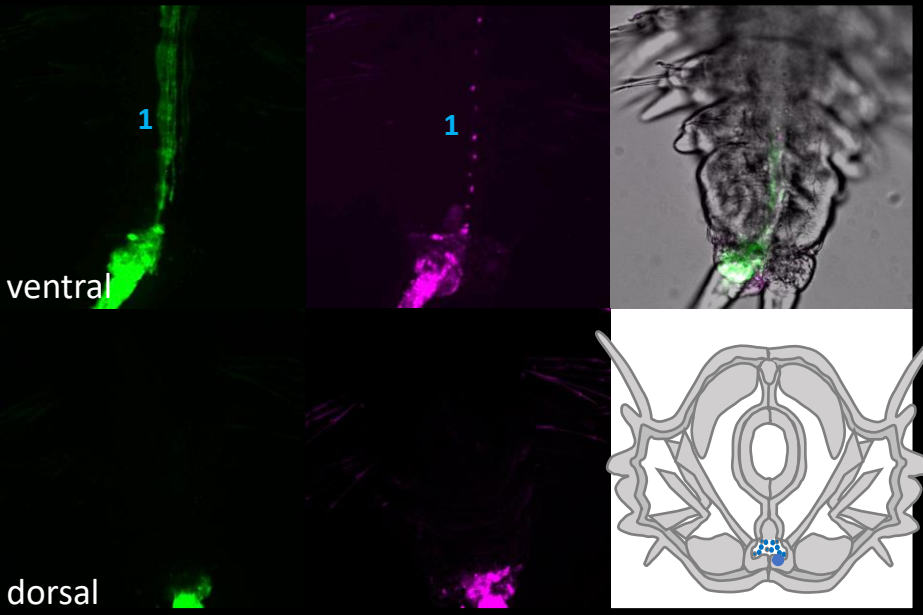

- Right pygidium
- Right median neural lineage **1**

After 1st amputation-  
regeneration

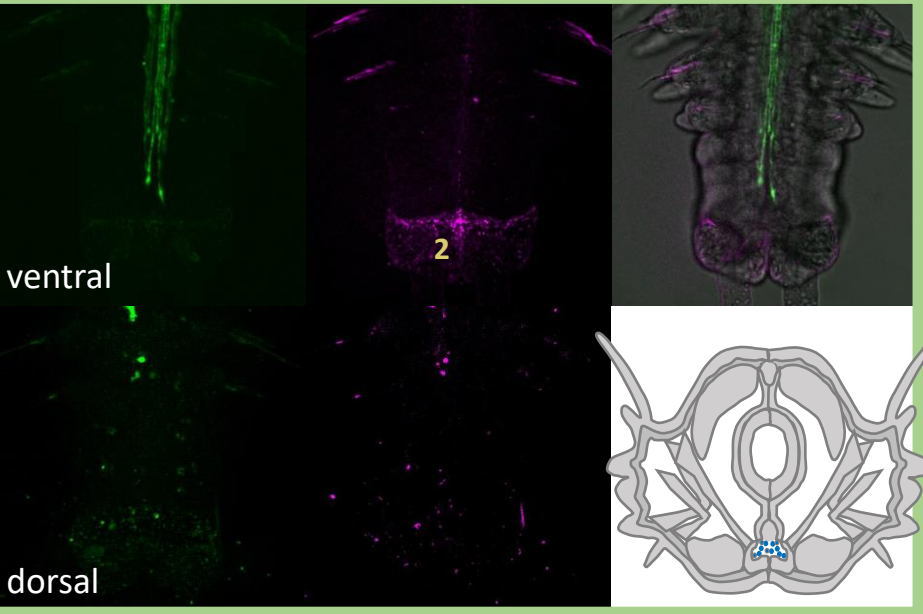

- Brain neurites
- Autofluorescent cuticle in pygidium **2**

After 2nd amputation-  
regeneration

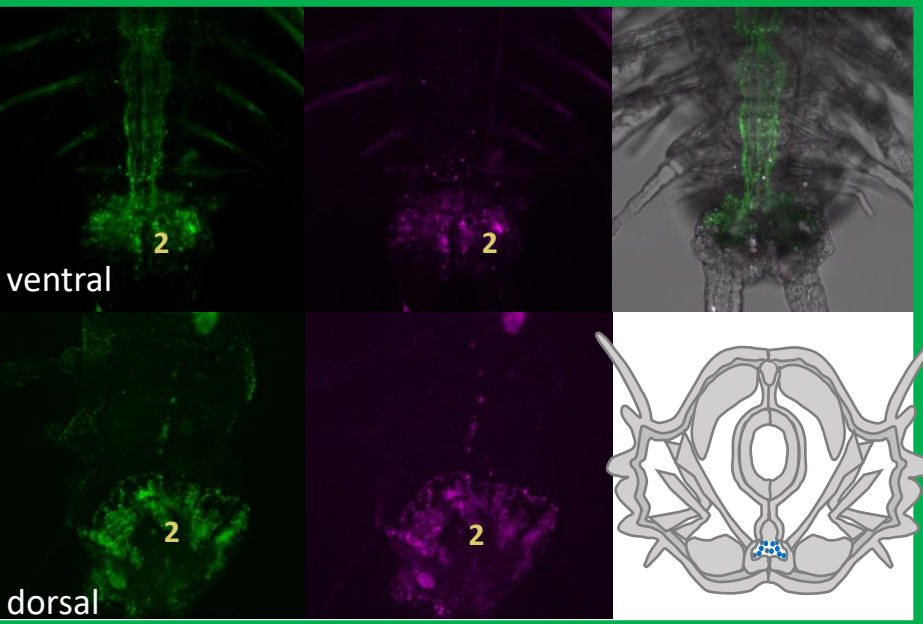

- Brain neurites
- Autofluorescent cuticle in pygidium **2**



- ectoderm
- mesoderm
- endoderm

Full Z-projections

Frontal section  
+ transverse scheme

ORIGINAL TAIL  
(no regeneration)

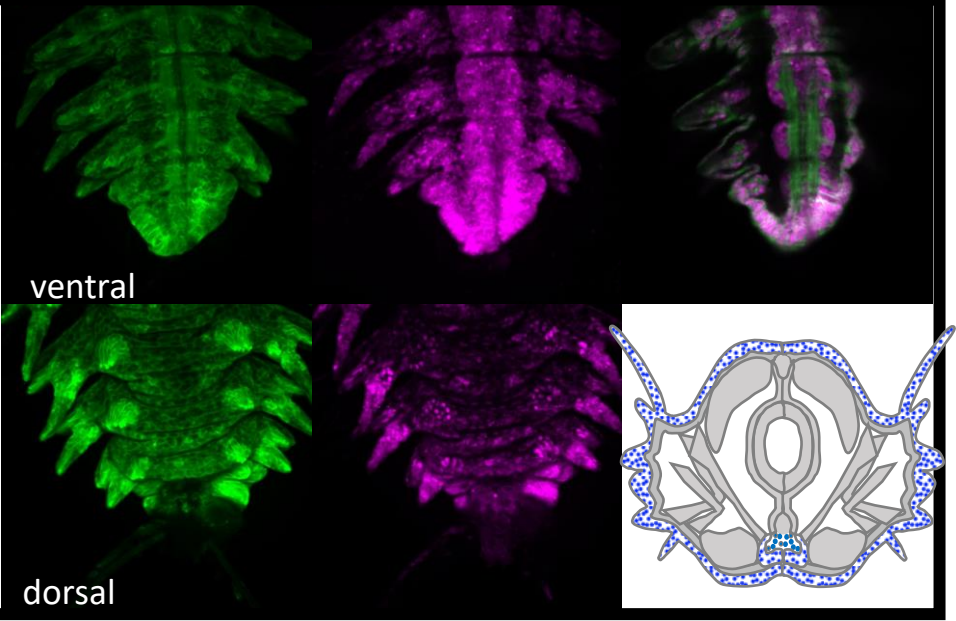

- Segmental ectoderm variegated

After 1st amputation-  
regeneration

After 2nd amputation-  
regeneration

- ectoderm
- mesoderm
- endoderm

Full Z-projections

Frontal section  
+ transverse scheme

ORIGINAL TAIL  
(no regeneration)

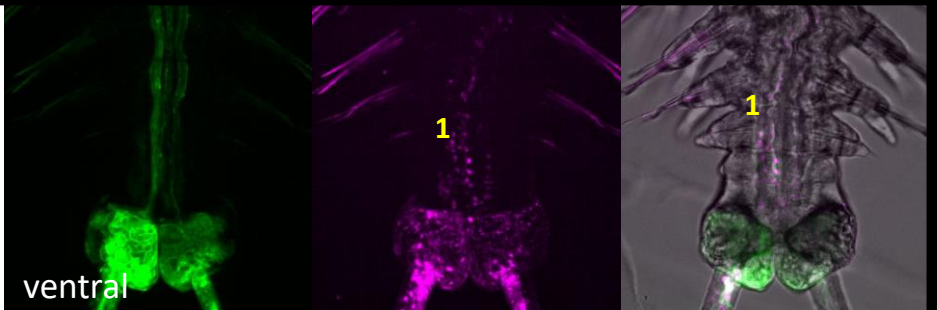

No dorsal view

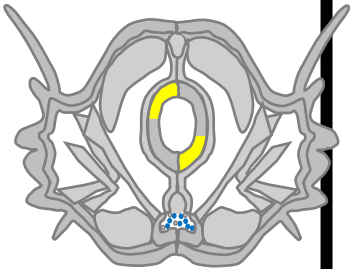

- Right median neural lineage
- Pygidium ectoderm
- Endoderm, partial 1

After 1st amputation-  
regeneration

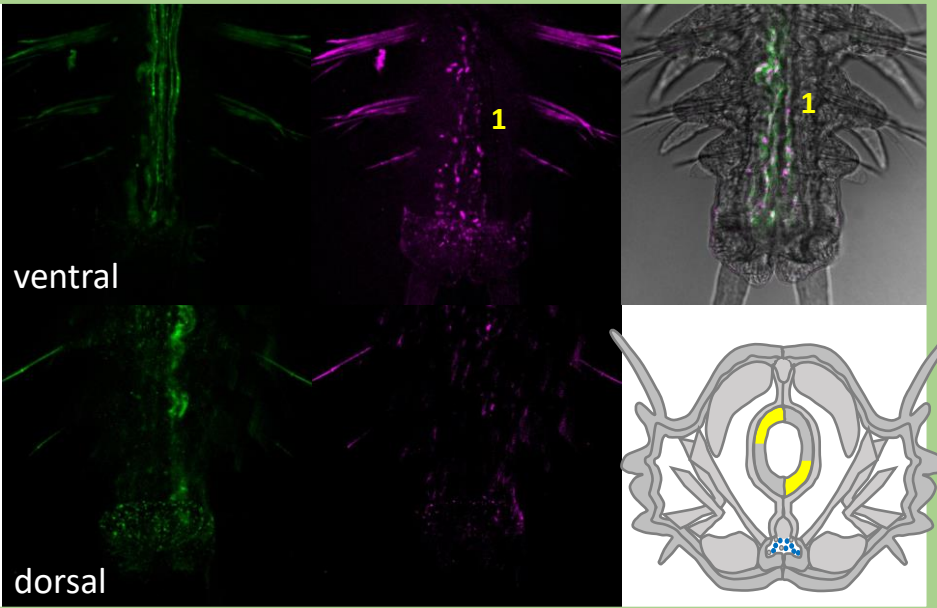

- Endoderm, partial 1

After 2nd amputation-  
regeneration

- ectoderm
- mesoderm
- endoderm

- Right median neural lineage **1**
- Pygidium ectoderm
- Segmental mesoderm, variegated **2**
- Endoderm, partial

ORIGINAL TAIL  
(no regeneration)

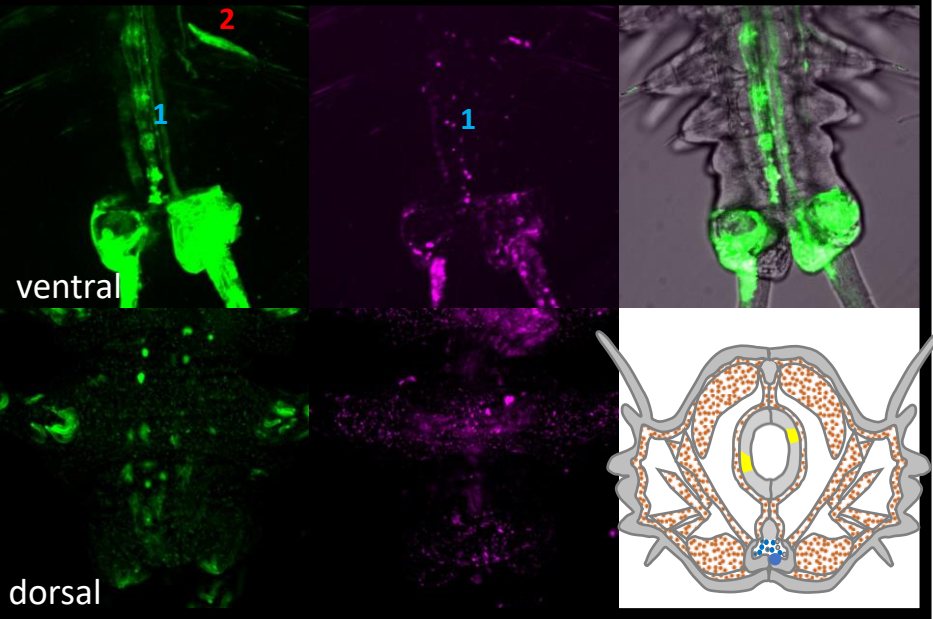

After 1st amputation-  
regeneration

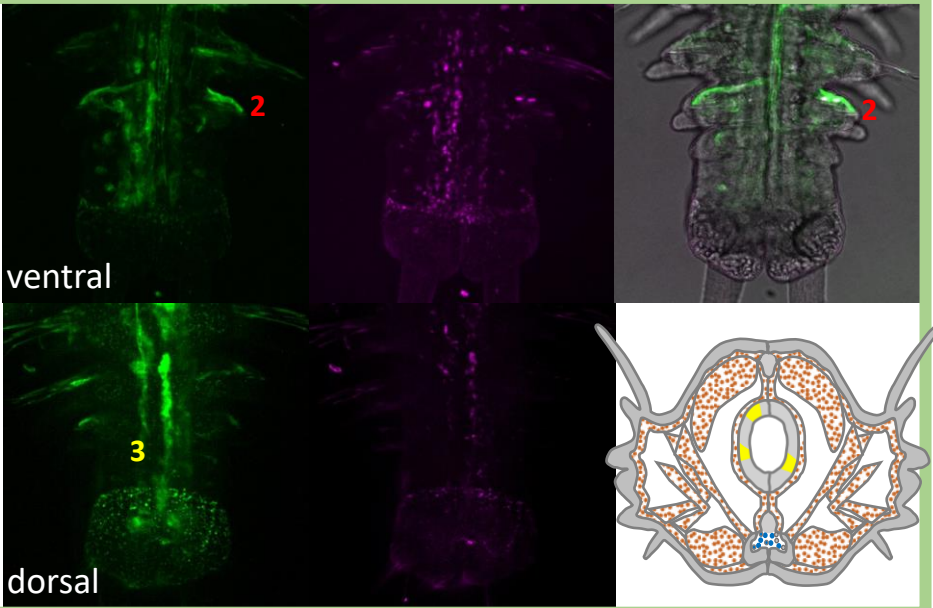

- Segmental mesoderm, variegated **2**
- Endoderm, partial **3**

After 2nd amputation-  
regeneration

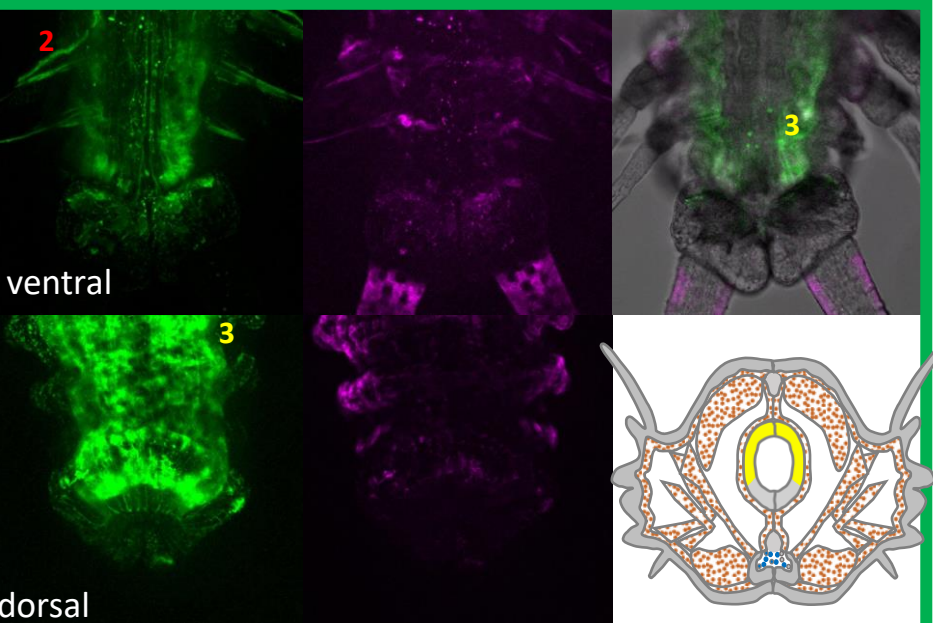

- Segmental mesoderm, variegated **2**
- Endoderm, partial **3**



membranes  
nuclei

N15

Transgenic tissues :

- ectoderm
- mesoderm
- endoderm

Full Z-projections

Frontal section  
+ transverse scheme

ORIGINAL TAIL  
(no regeneration)

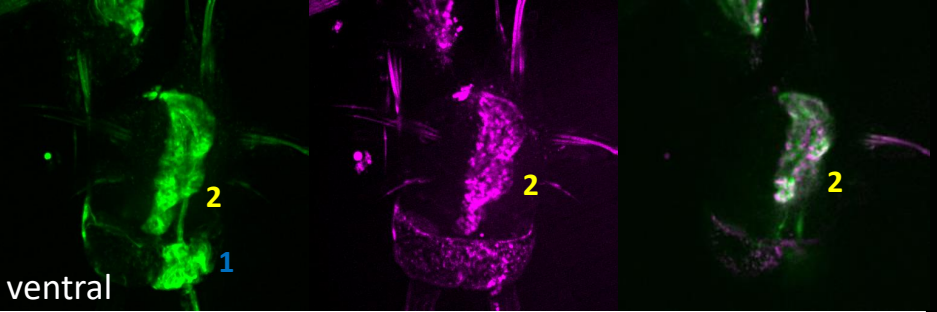

No dorsal view

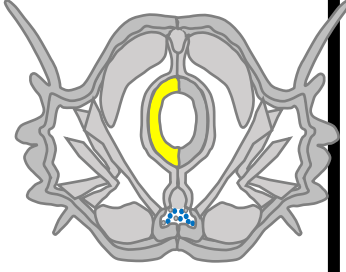

- Pygidium ectoderm, left side, partial 1
- Left endoderm 2

After 1st amputation-  
regeneration

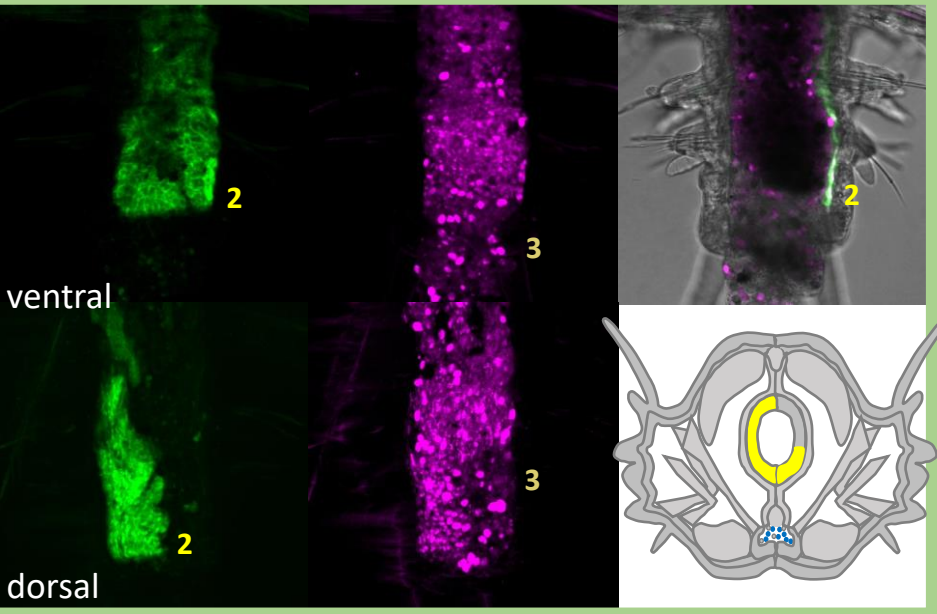

- Left and ventral endoderm 2
- Fluorescent gut content 3

After 2nd amputation-  
regeneration

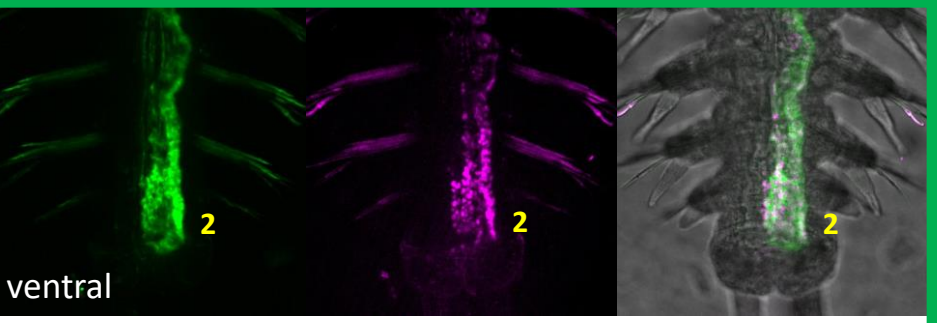

No dorsal view

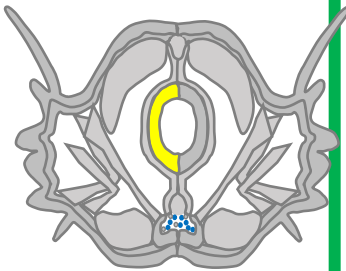

- Left endoderm 2

- ectoderm
- mesoderm
- endoderm

- Segmental ectoderm
- Pygidium ectoderm with a missing part on the left

ORIGINAL TAIL  
(no regeneration)

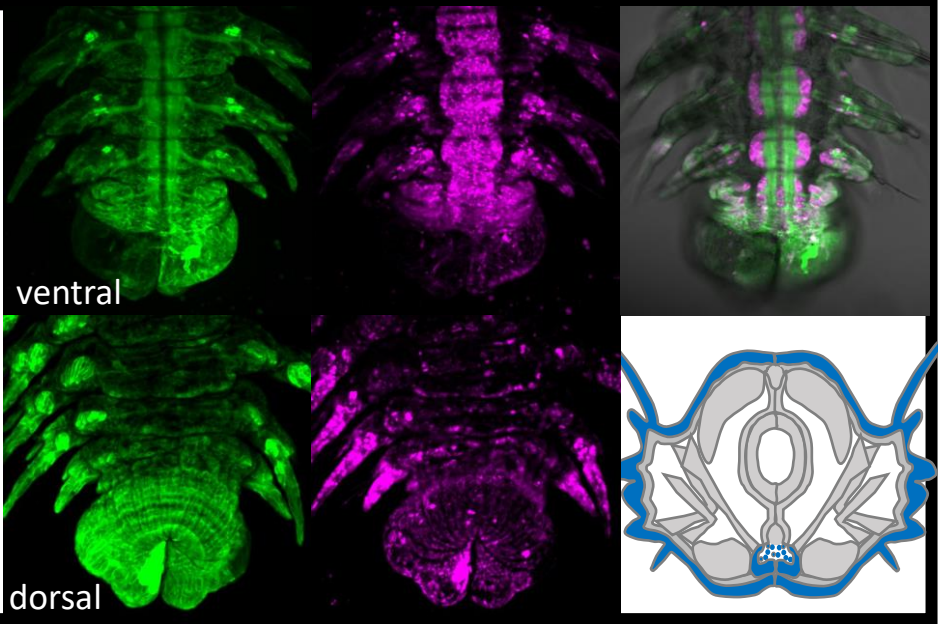

After 1st amputation-  
regeneration

After 2nd amputation-  
regeneration

- ectoderm
- mesoderm
- endoderm

ORIGINAL TAIL  
(no regeneration)

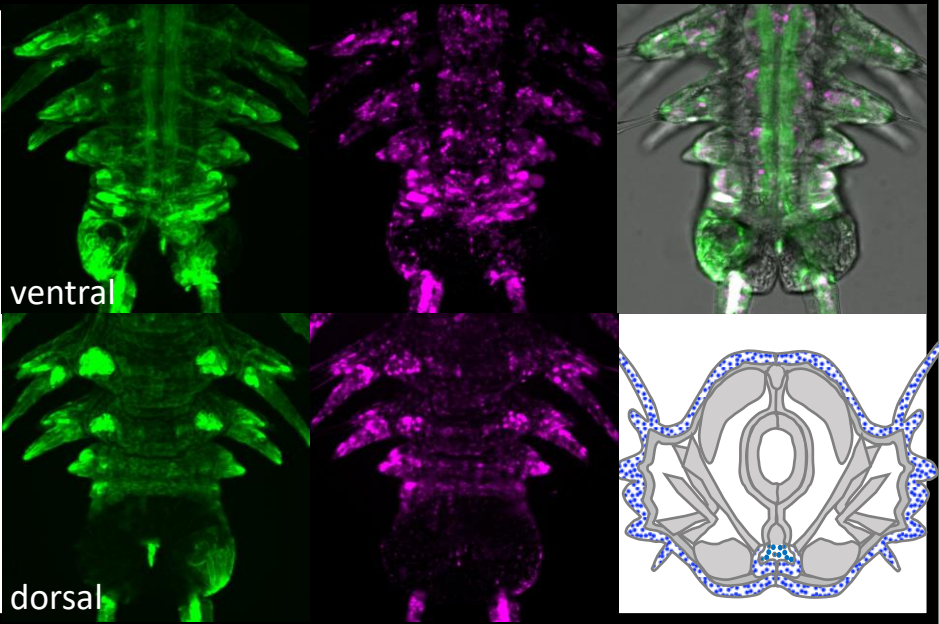

- Segmental ectoderm, variegated
- Pygidium ectoderm partial

After 1st amputation-  
regeneration

After 2nd amputation-  
regeneration



- ectoderm
- mesoderm
- endoderm

Full Z-projections

Frontal section  
+ transverse scheme

ORIGINAL TAIL  
(no regeneration)

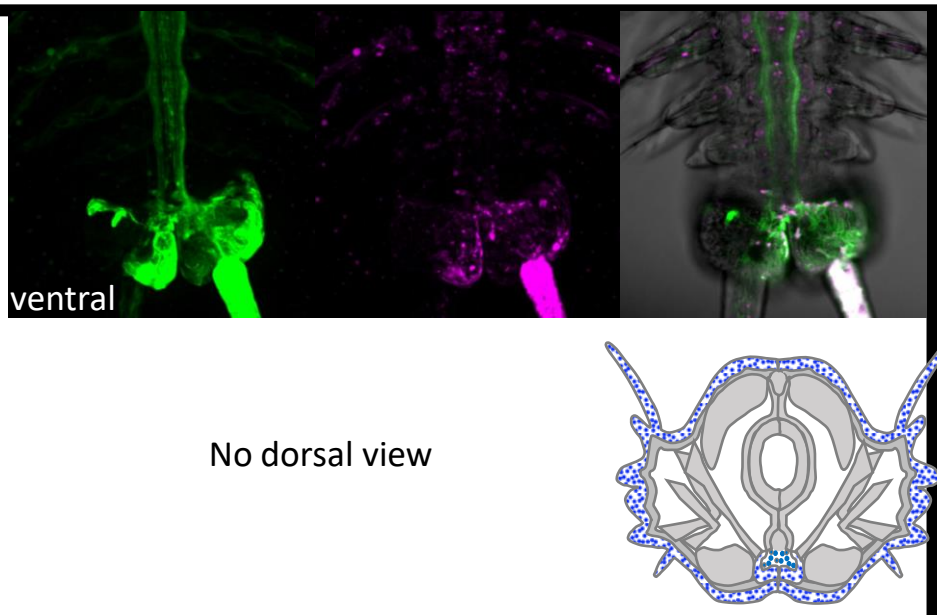

- Segmental ectoderm, weak, mostly nerves visible
- Pygidium ectoderm partial

After 1st amputation-  
regeneration

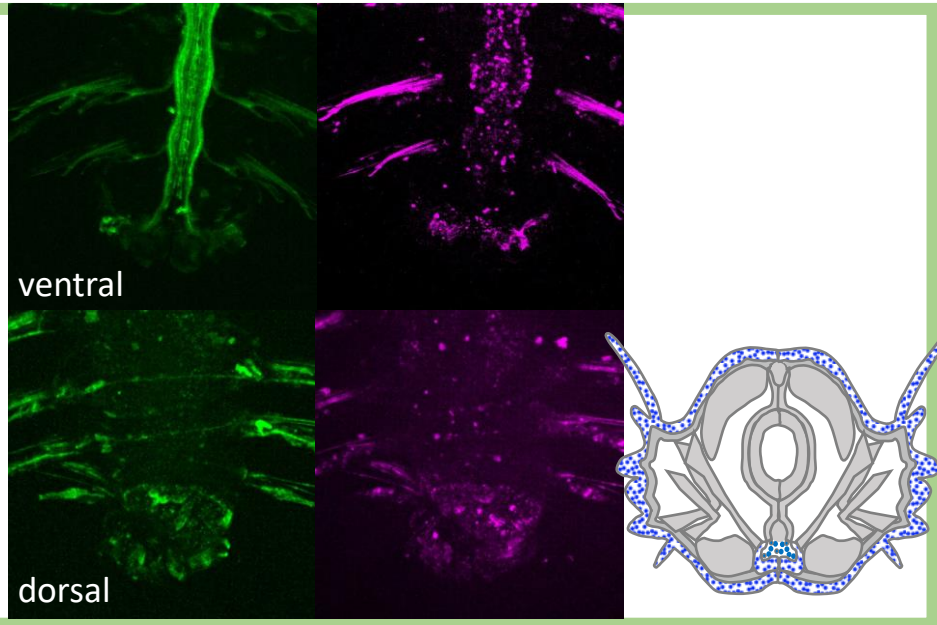

- Segmental ectoderm, weak, mostly nerves visible
- Pygidium ectoderm variegated

After 2nd amputation-  
regeneration

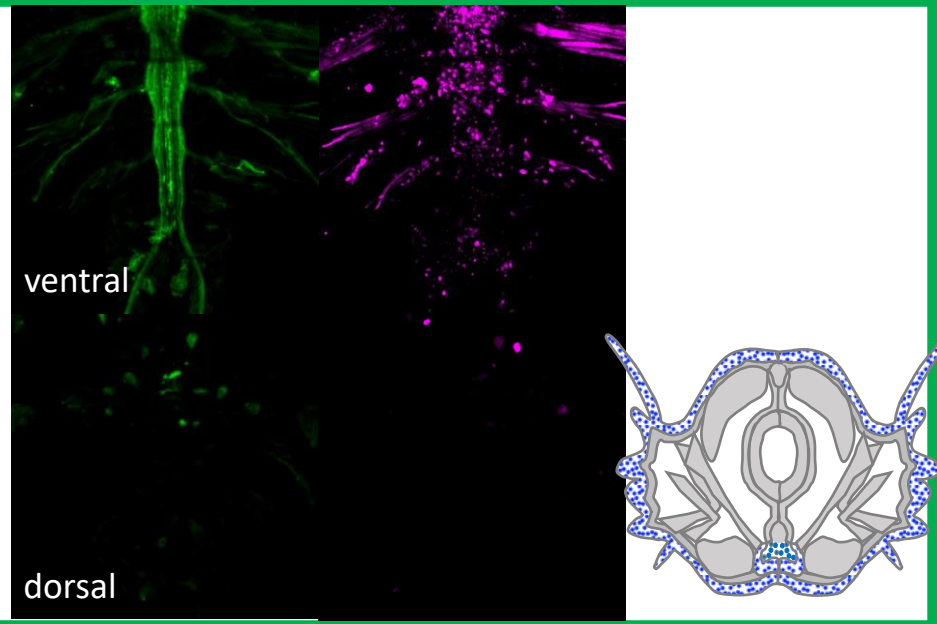

- Segmental ectoderm, weak, mostly nerves visible
- Pygidium ectoderm very weak

membranes  
nuclei

N21A

Transgenic tissues :

- ectoderm
- mesoderm
- endoderm

Full Z-projections

Frontal section  
+ transverse scheme

ORIGINAL TAIL  
(no regeneration)

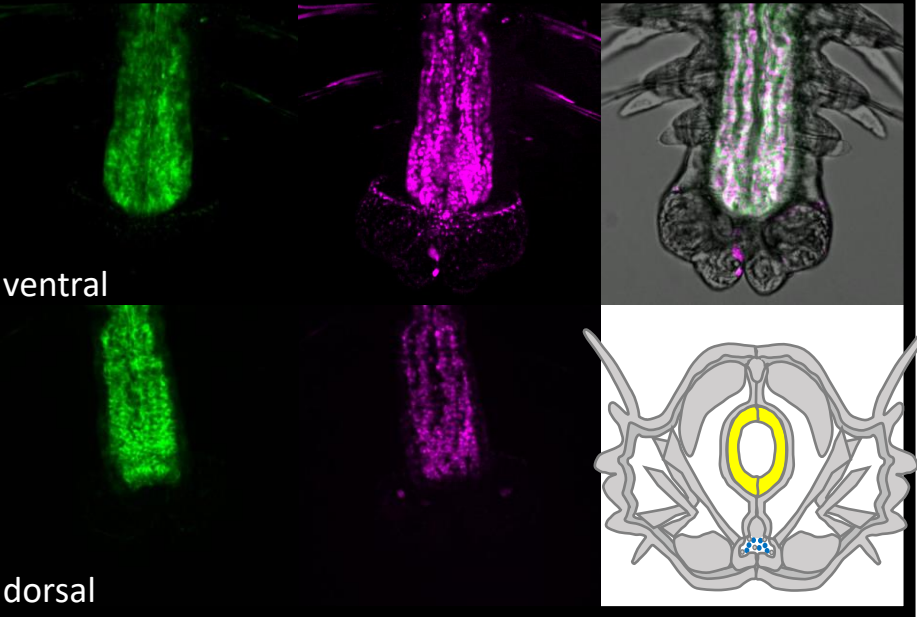

• Whole endoderm

After 1st amputation-  
regeneration

No ventral view

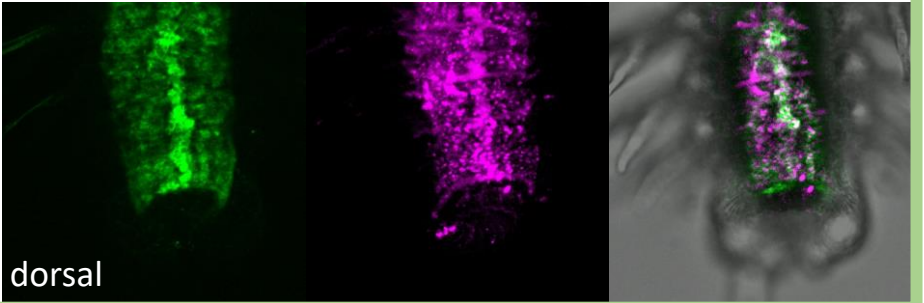

• Whole endoderm

After 2nd amputation-  
regeneration

No ventral view

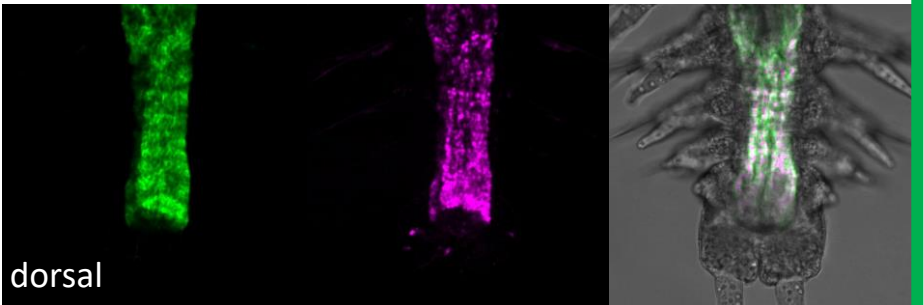

• Whole endoderm

membranes  
nuclei

N21B

Full Z-projections

Frontal section  
+ transverse scheme

Transgenic tissues :

- ectoderm
- mesoderm
- endoderm

ORIGINAL TAIL  
(no regeneration)

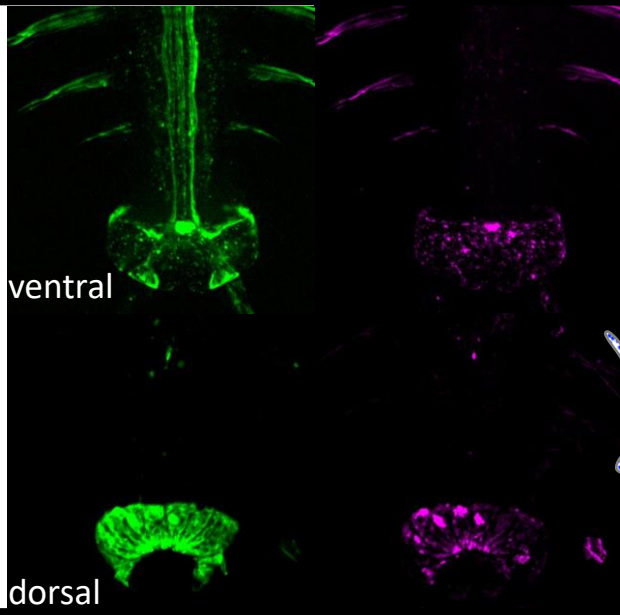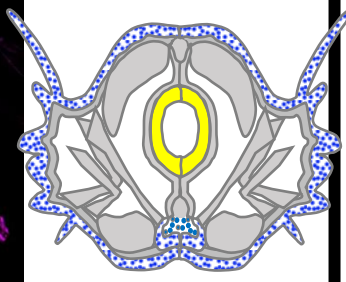

- Segmental ectoderm, weak, mostly nerves visible
- Pygidium ectoderm partial
- Endoderm, weak

After 1st amputation-  
regeneration

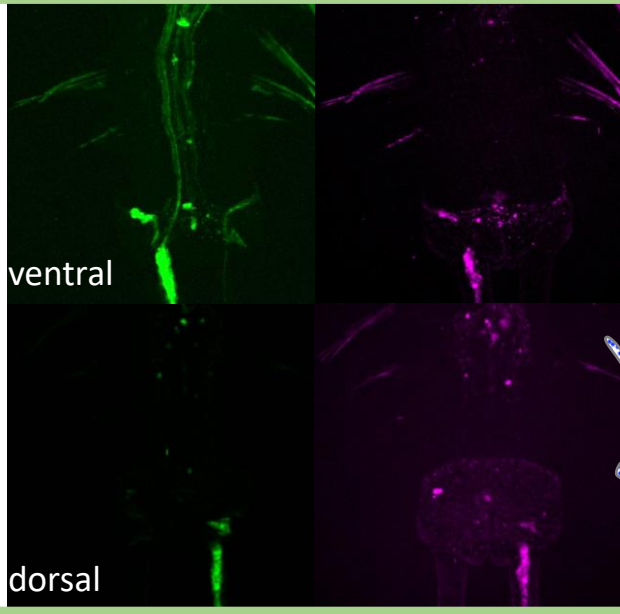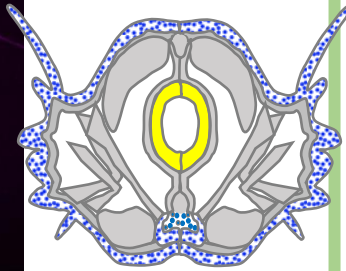

- Segmental ectoderm, weak
- Pygidium ectoderm partial and weak
- Endoderm, weak

After 2nd amputation-  
regeneration

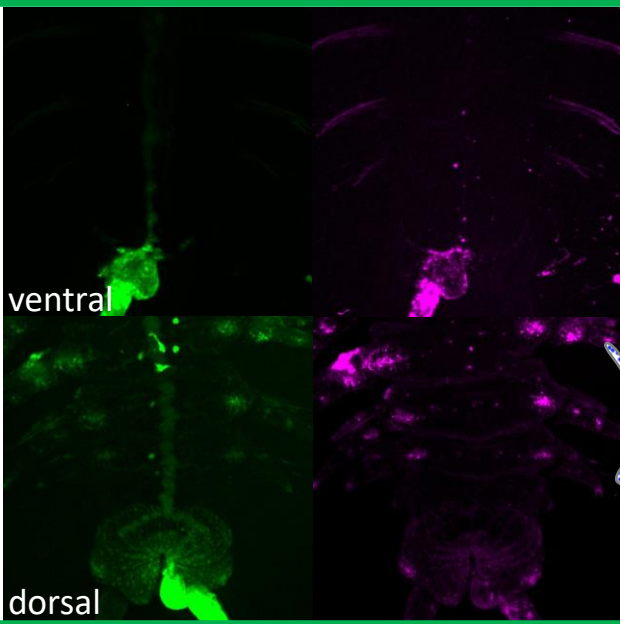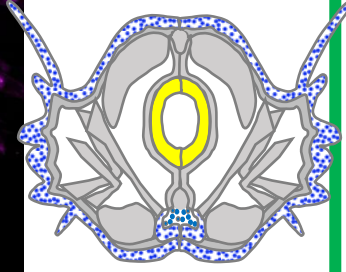

- Segmental ectoderm, weak, mostly nerves visible
- Pygidium ectoderm partial and weak
- Right median neural lineage
- Endoderm weak



- ectoderm
- mesoderm
- endoderm

Full Z-projections

Frontal section  
+ transverse scheme

ORIGINAL TAIL  
(no regeneration)

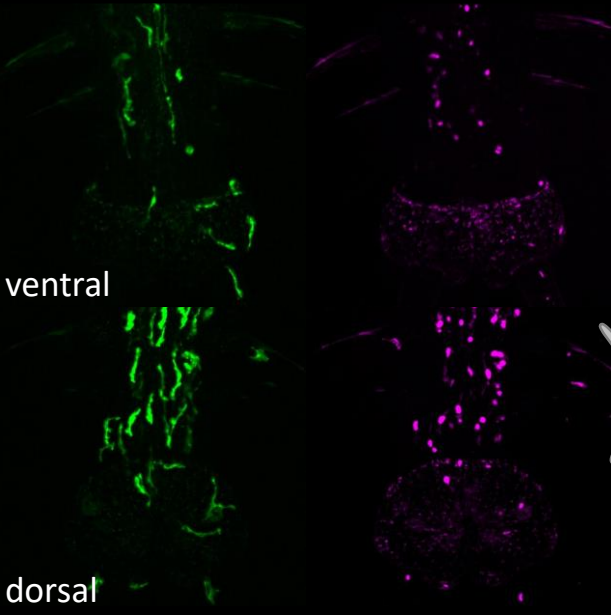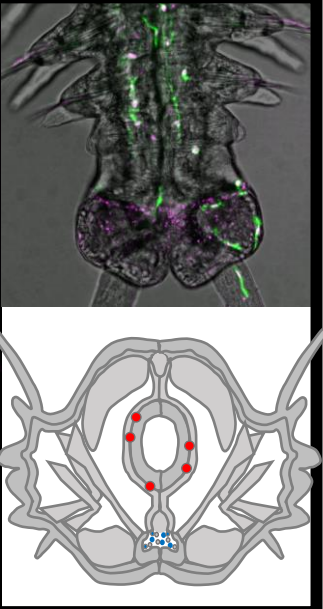

• Amoebooid cells

After 1st amputation-  
regeneration

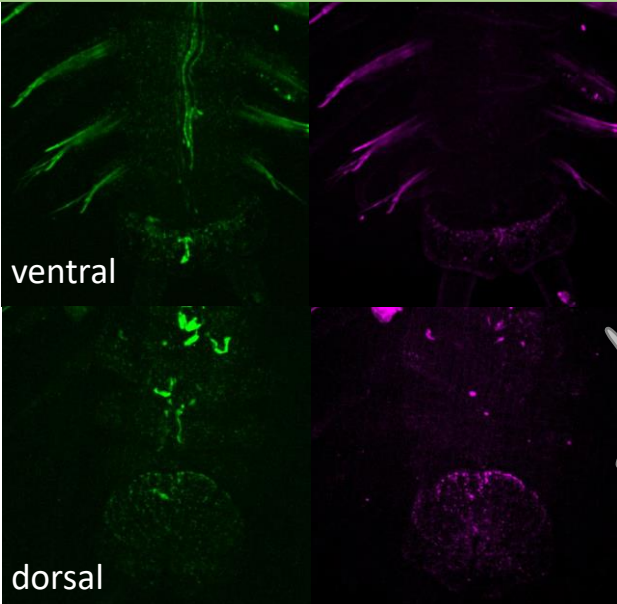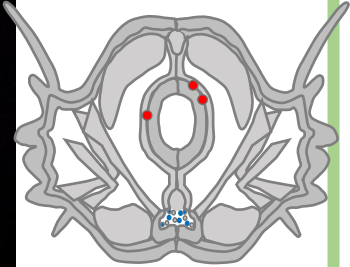

• Amoebooid cells  
(dorsal side)

After 2nd amputation-  
regeneration

- ectoderm
- mesoderm
- endoderm

ORIGINAL TAIL  
(no regeneration)

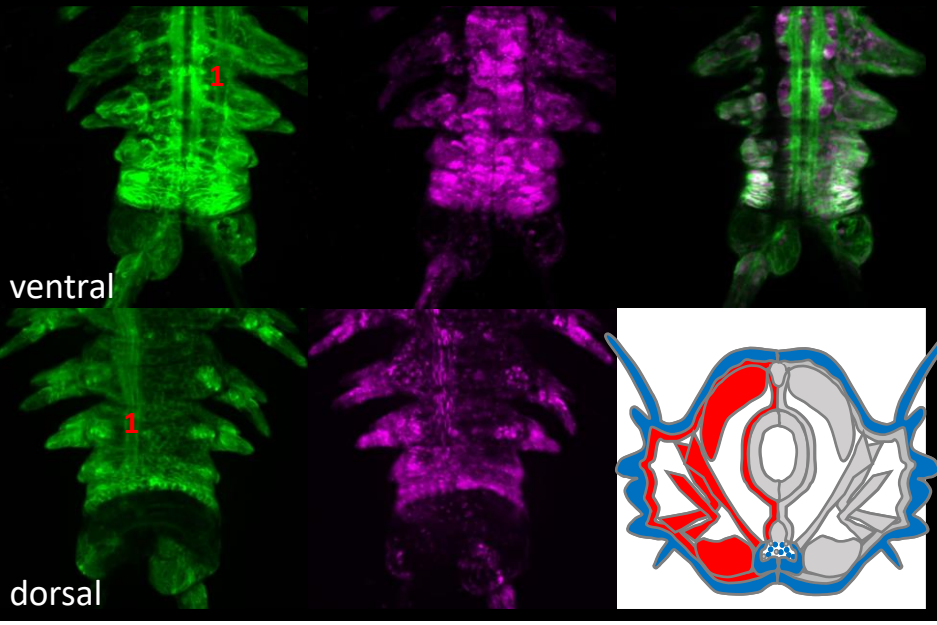

- Segmental ectoderm
- Pygidium ectoderm partial
- Left mesoderm **1**

After 1st amputation-  
regeneration

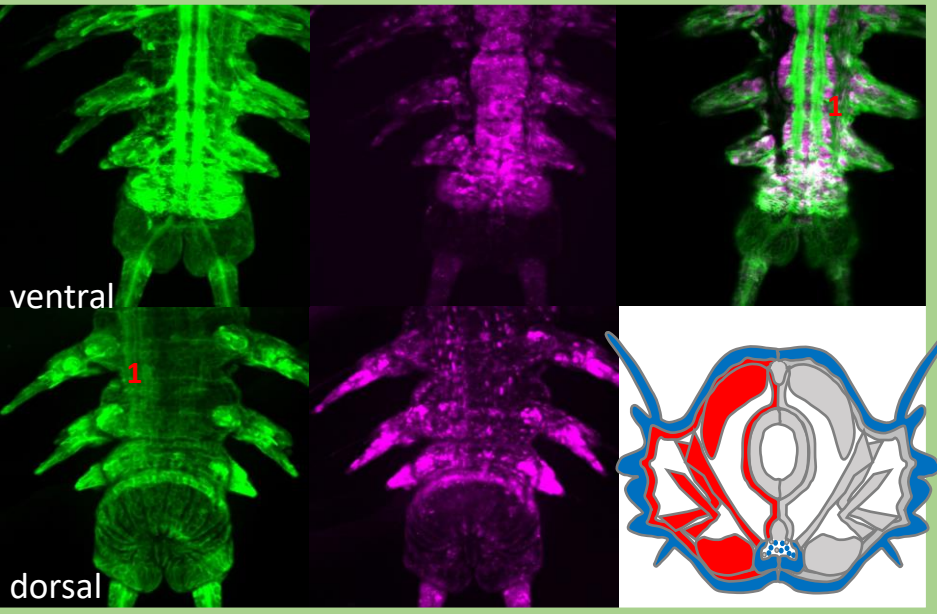

- Segmental ectoderm
- Pygidium ectoderm partial
- Left mesoderm **1**

After 2nd amputation-  
regeneration

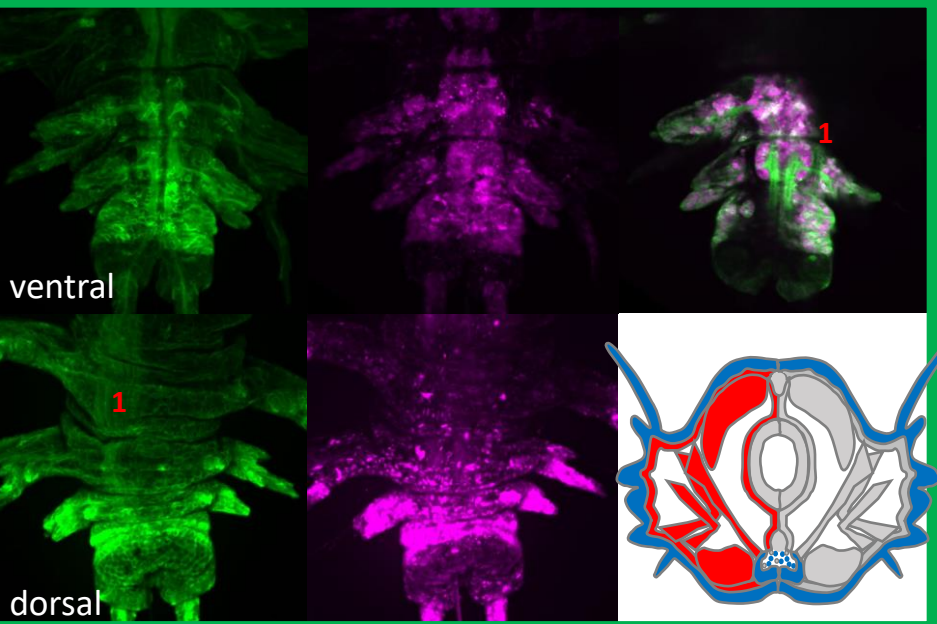

- Segmental ectoderm
- Pygidium ectoderm partial
- Left mesoderm **1**

- ectoderm
- mesoderm
- endoderm

Full Z-projections

Frontal section  
+ transverse scheme

ORIGINAL TAIL  
(no regeneration)

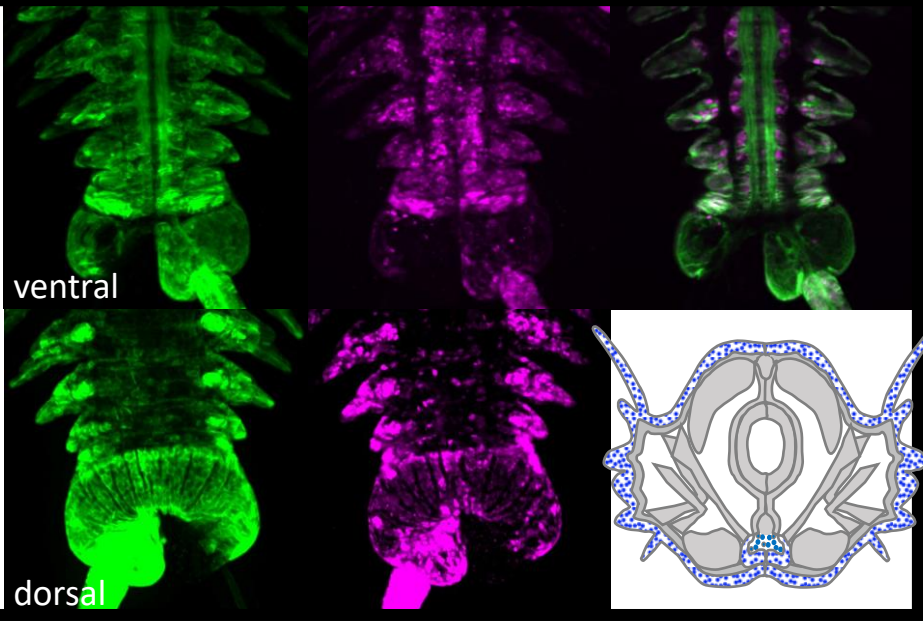

- Segmental ectoderm, variegated
- Pygidium ectoderm, partial

After 1st amputation-  
regeneration

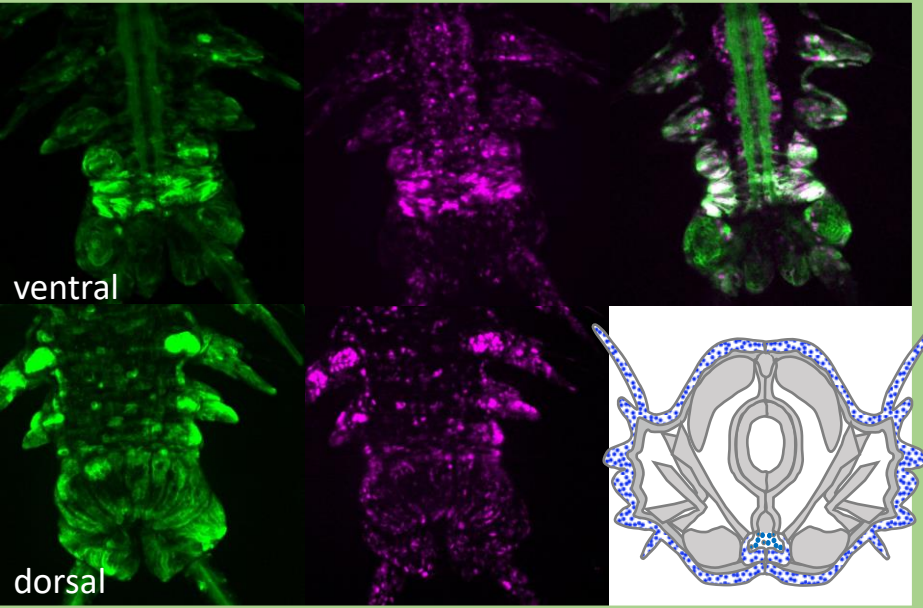

- Segmental ectoderm, variegated
- Pygidium ectoderm, variegated

After 2nd amputation-  
regeneration



- ectoderm
- mesoderm
- endoderm

ORIGINAL TAIL  
(no regeneration)

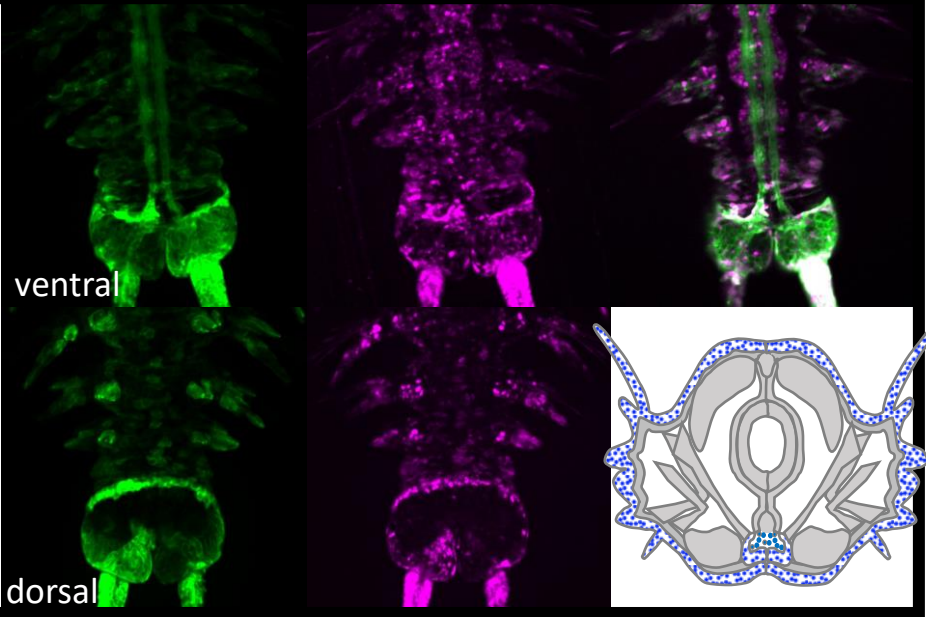

- Segmental ectoderm, variegated
- Pygidium ectoderm, partial

After 1st amputation-  
regeneration

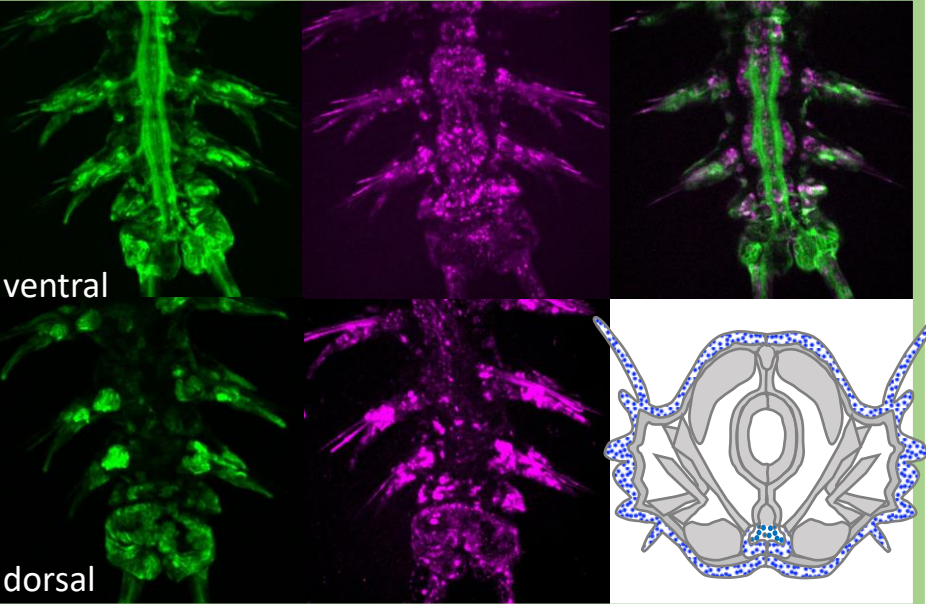

- Segmental ectoderm, variegated
- Pygidium ectoderm, variegated

After 2nd amputation-  
regeneration

- ectoderm
- mesoderm
- endoderm

Full Z-projections

Frontal section  
+ transverse scheme

ORIGINAL TAIL  
(no regeneration)

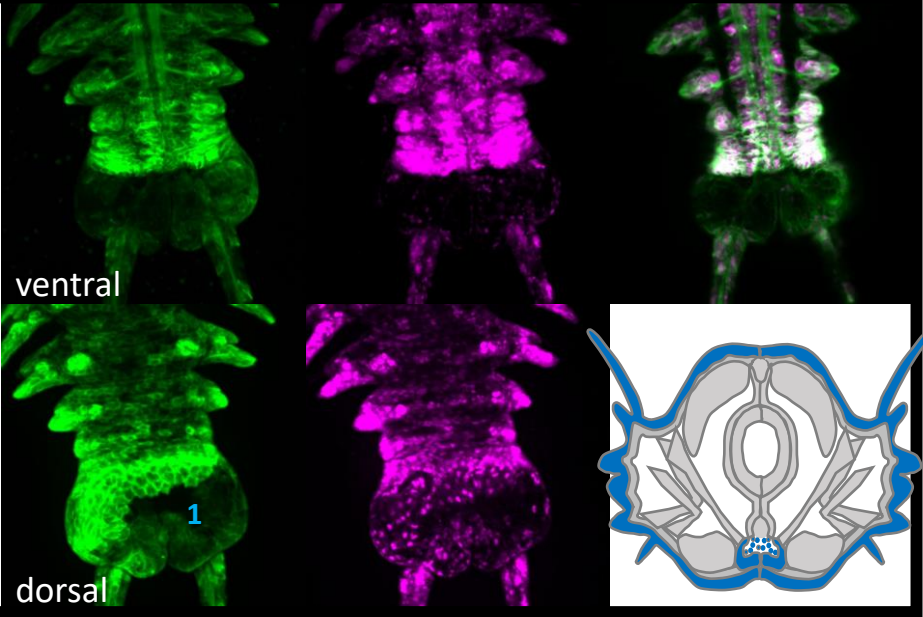

- Segmental ectoderm
- Pygidium ectoderm with a missing part on the right **1**

After 1st amputation-  
regeneration

After 2nd amputation-  
regeneration

membranes  
nuclei

N28

Full Z-projections

Frontal section  
+ transverse scheme

Transgenic tissues :

- ectoderm
- mesoderm
- endoderm

ORIGINAL TAIL  
(no regeneration)

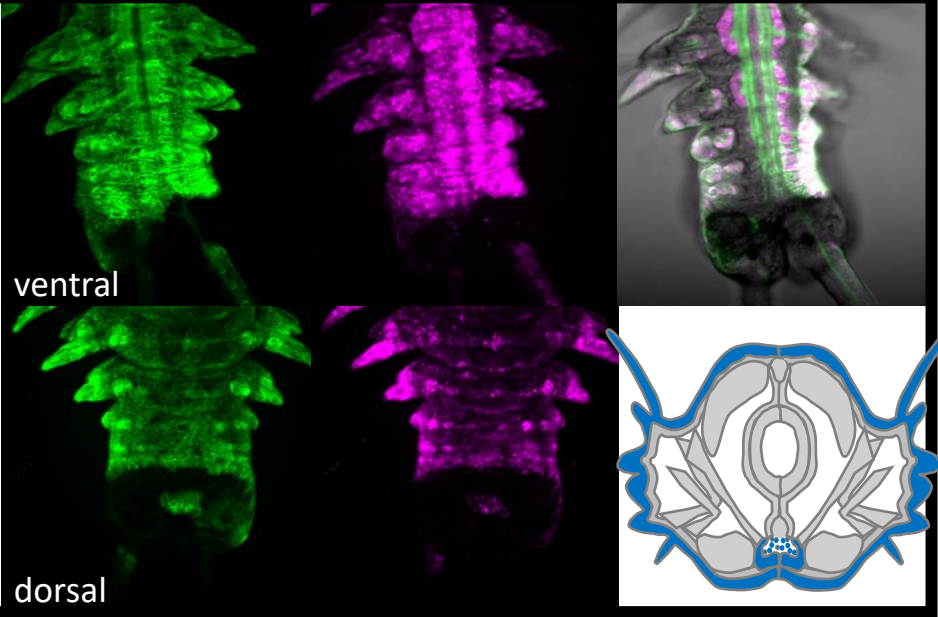

- Segmental ectoderm
- Pygidium ectoderm partial

After 1st amputation-  
regeneration

After 2nd amputation-  
regeneration

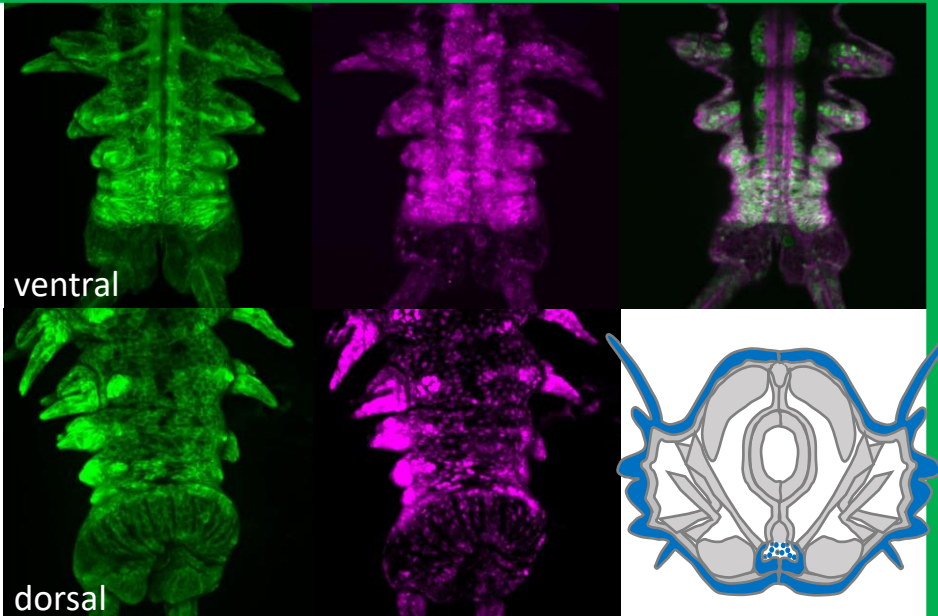

- Segmental ectoderm
- Pygidium ectoderm



- ectoderm
- mesoderm
- endoderm

Full Z-projections

Frontal section  
+ transverse scheme

ORIGINAL TAIL  
(no regeneration)

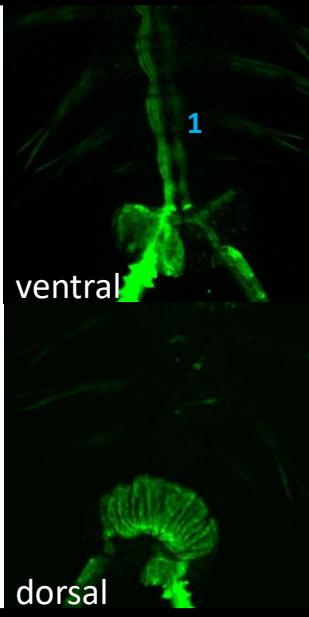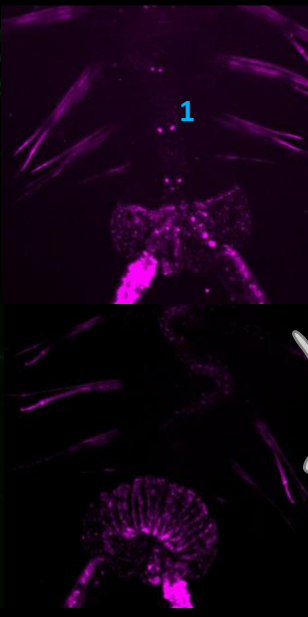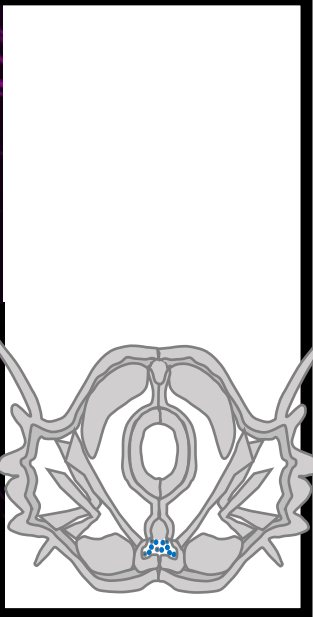

- Median neural lineage **1**
- Pygidium ectoderm, partial

After 1st amputation-  
regeneration

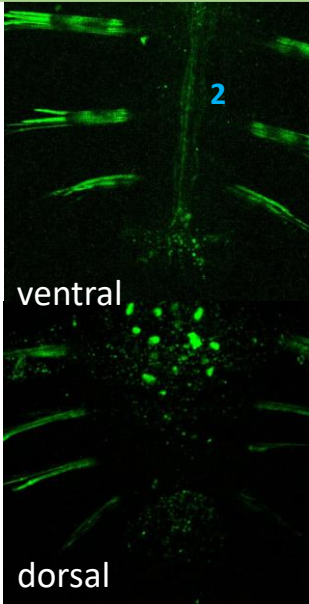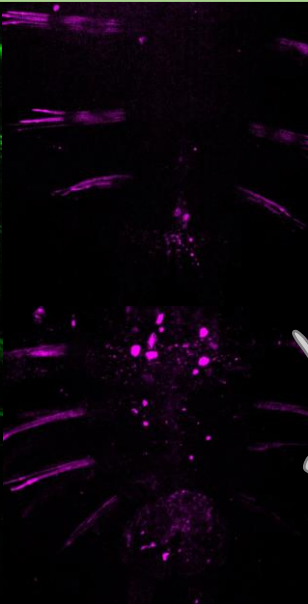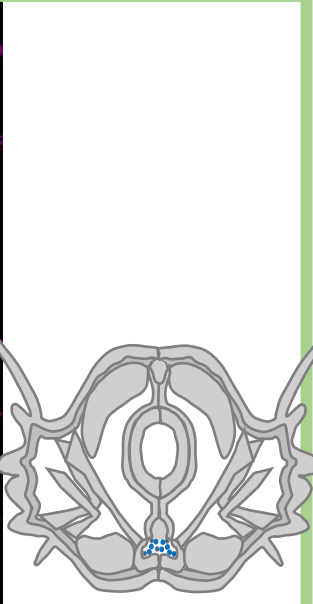

- Brain neurites **2**

After 2nd amputation-  
regeneration

- ectoderm
- mesoderm
- endoderm

ORIGINAL TAIL  
(no regeneration)

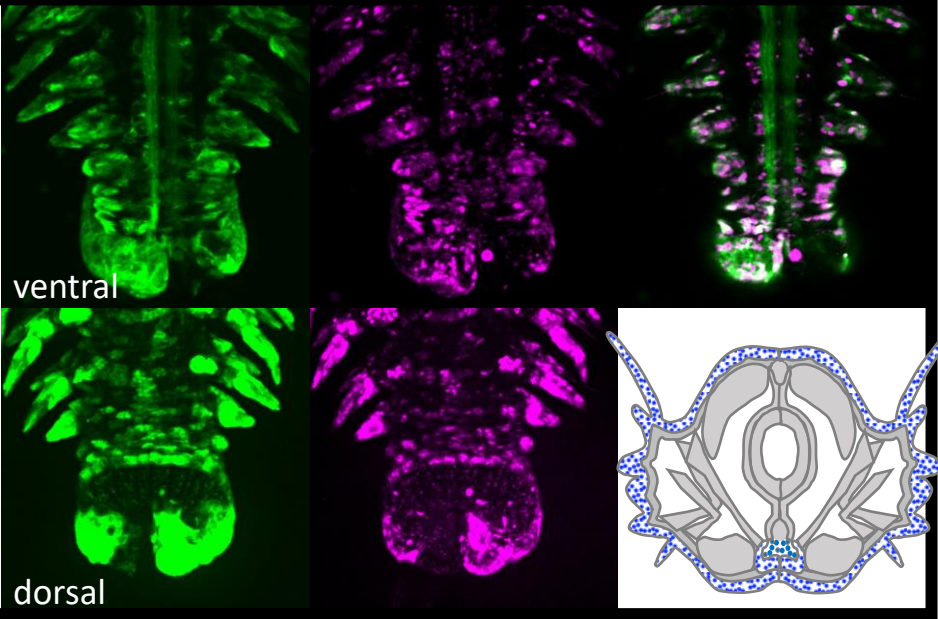

- Segmental ectoderm, variegated
- Pygidium ectoderm, partial

After 1st amputation-  
regeneration

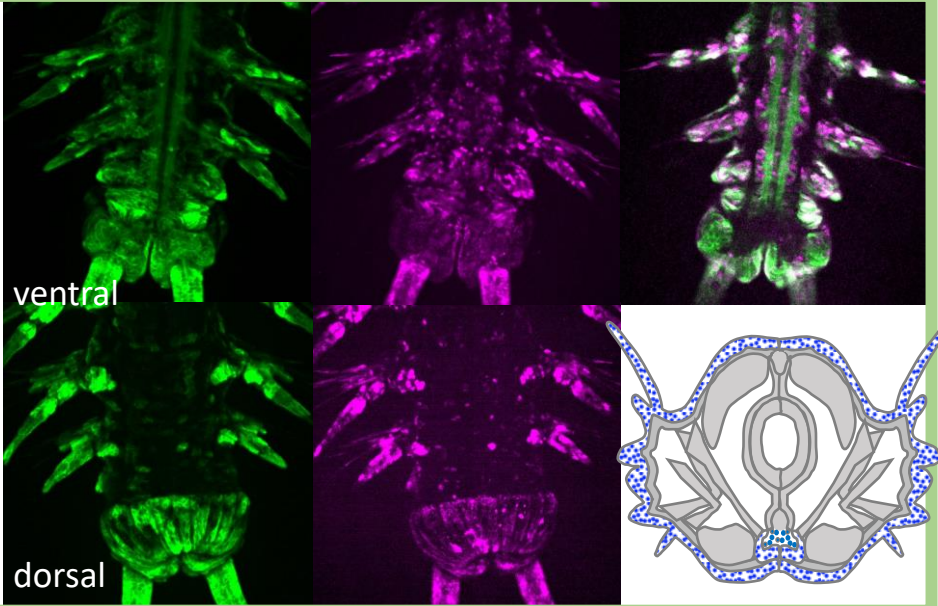

- Segmental ectoderm, variegated
- Pygidium ectoderm, variegated

After 2nd amputation-  
regeneration

- ectoderm
- mesoderm
- endoderm

ORIGINAL TAIL  
(no regeneration)

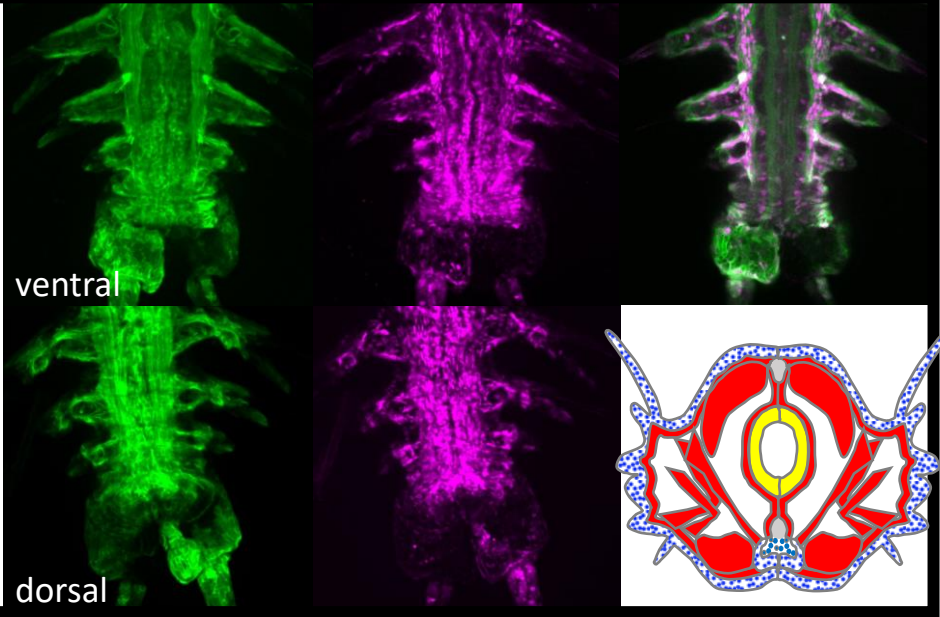

- Segmental ectoderm, very weak
- Pygidium ectoderm, partial
- Whole mesoderm
- Whole gut

After 1st amputation-  
regeneration

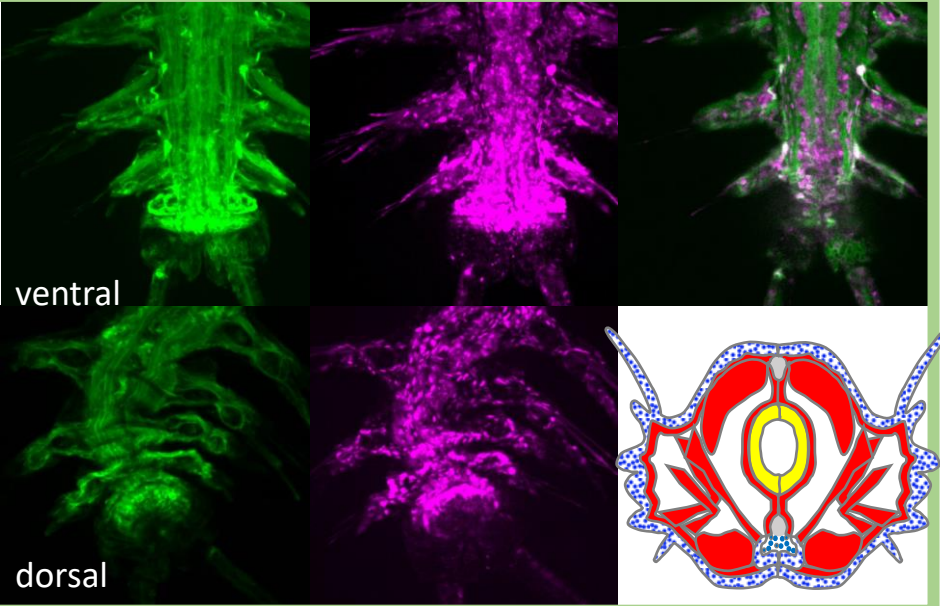

- Segmental ectoderm, very weak
- Pygidium ectoderm, weak
- Whole mesoderm
- Whole gut

After 2nd amputation-  
regeneration

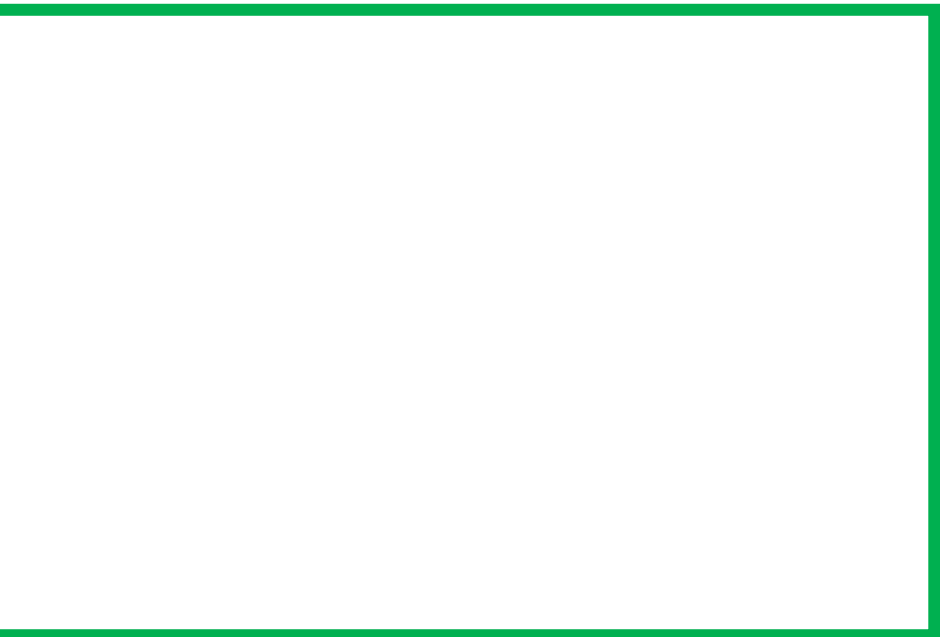



membranes  
nuclei

N36

Full Z-projections

Frontal section  
+ transverse scheme

Transgenic tissues :

- ectoderm
- mesoderm
- endoderm

ORIGINAL TAIL  
(no regeneration)

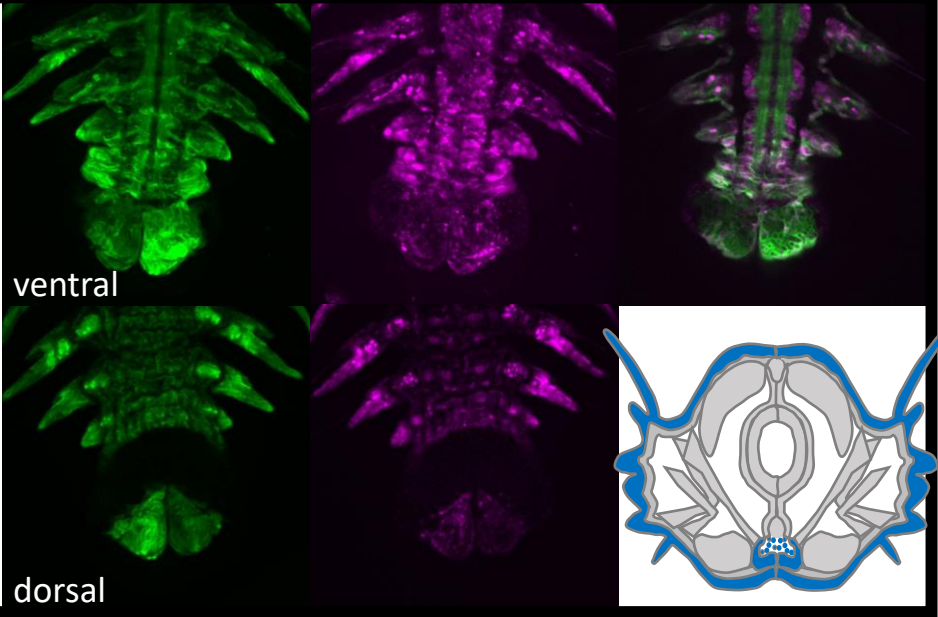

After 1st amputation-  
regeneration

After 2nd amputation-  
regeneration

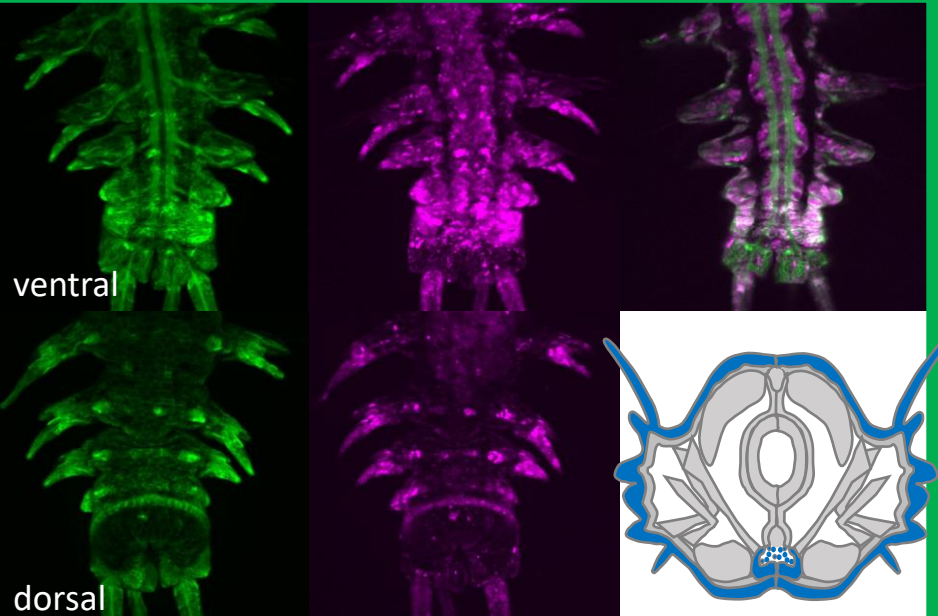

- ectoderm
- mesoderm
- endoderm

Full Z-projections

Frontal section  
+ transverse scheme

ORIGINAL TAIL  
(no regeneration)

ventral

No dorsal view

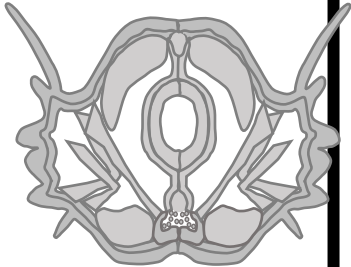

- Pygidium ectoderm, partial

After 1st amputation-  
regeneration

After 2nd amputation-  
regeneration

- ectoderm
- mesoderm
- endoderm

ORIGINAL TAIL  
(no regeneration)

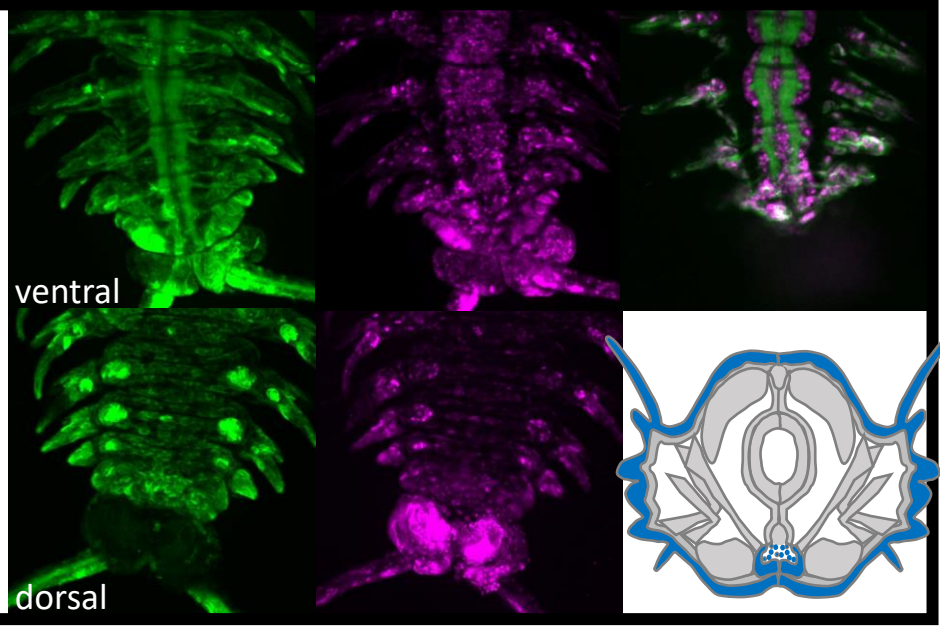

- Segmental ectoderm
- Pygidium ectoderm, partial

After 1st amputation-  
regeneration

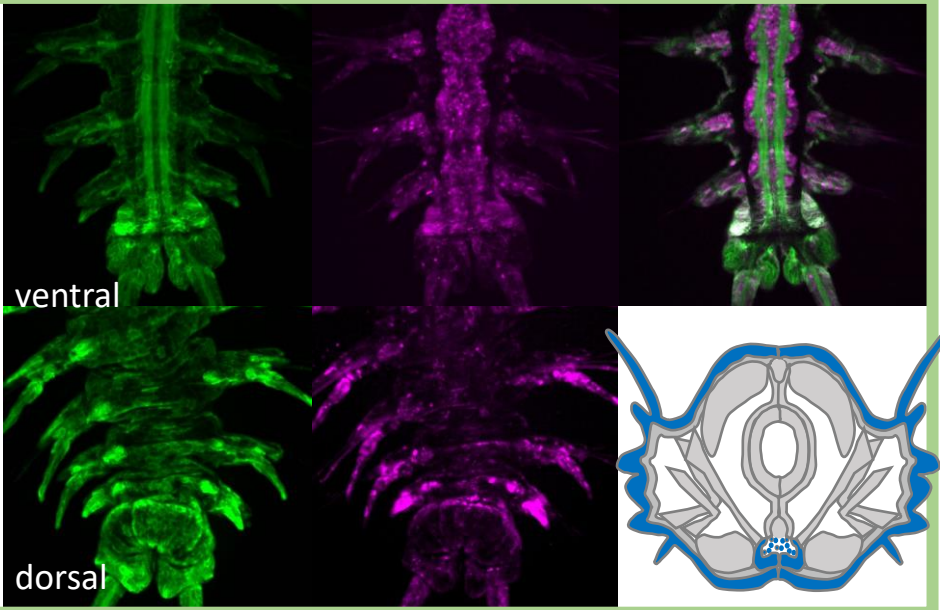

- Segmental ectoderm
- Pygidium ectoderm

After 2nd amputation-  
regeneration

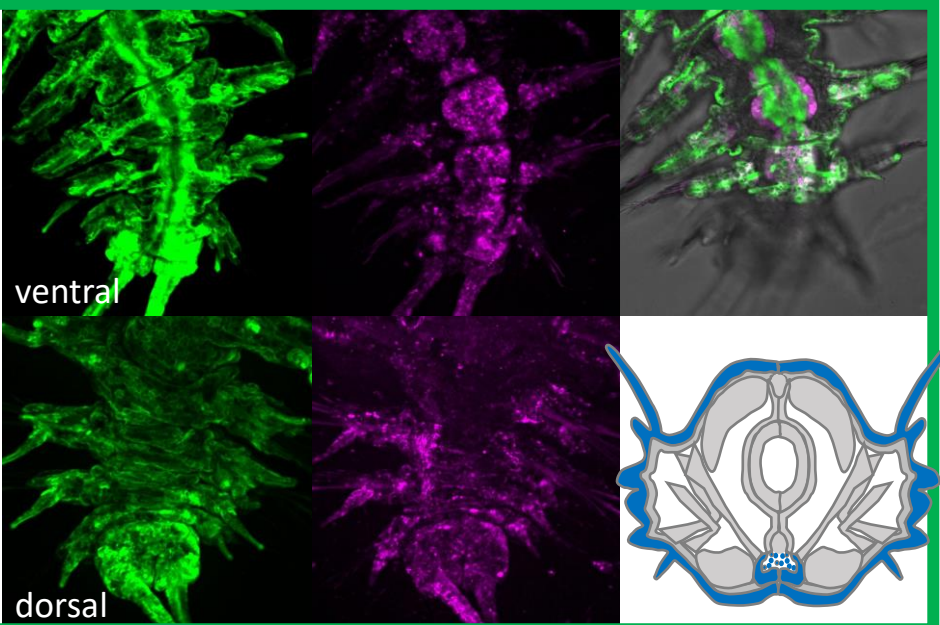

- Segmental ectoderm
- Pygidium ectoderm



- ectoderm
- mesoderm
- endoderm

Full Z-projections

Frontal section  
+ transverse scheme

ORIGINAL TAIL  
(no regeneration)

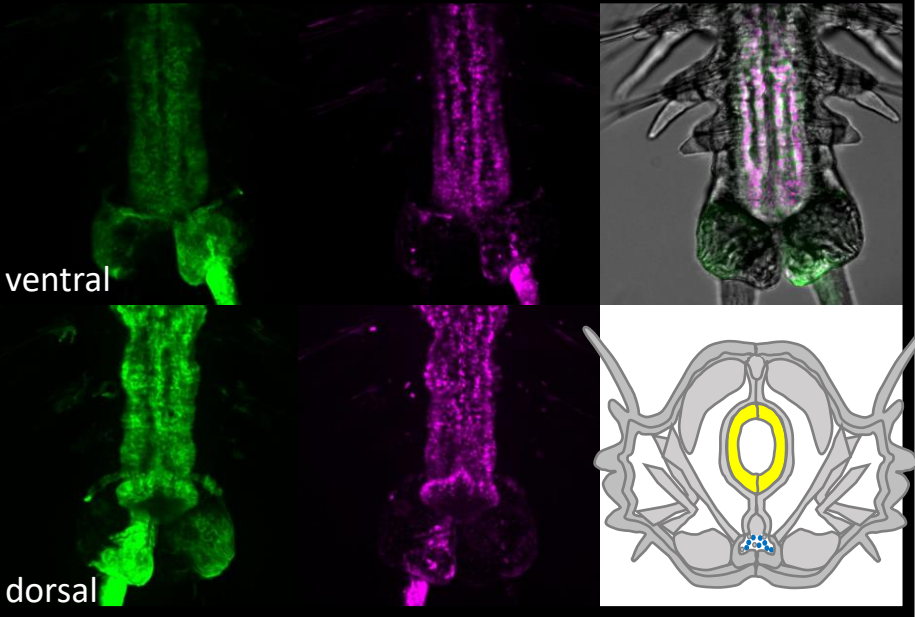

- Right median neural lineage
- Pygidium ectoderm, partial
- Whole endoderm

After 1st amputation-  
regeneration

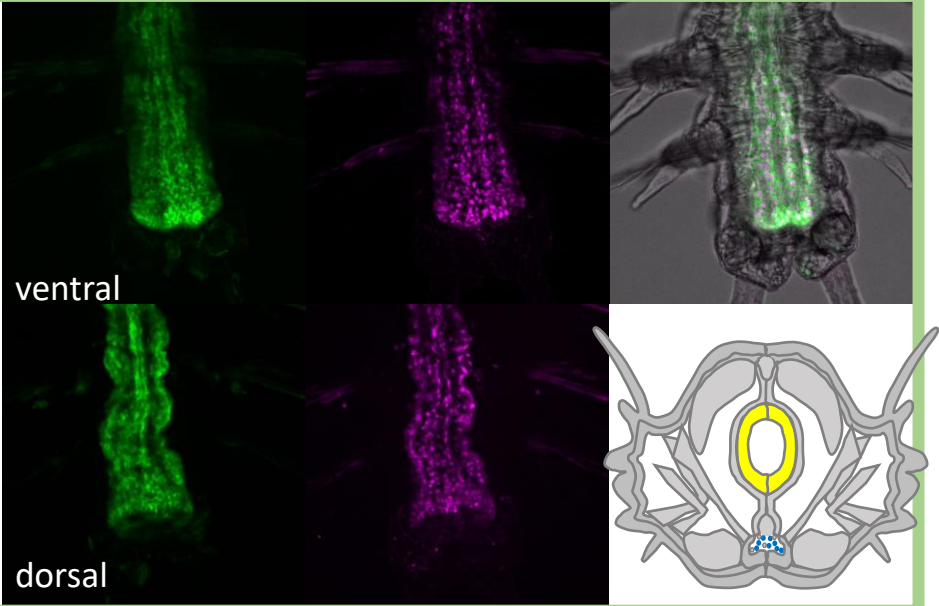

- Whole endoderm

After 2nd amputation-  
regeneration

- ectoderm
- mesoderm
- endoderm

Full Z-projections

Frontal section  
+ transverse scheme

ORIGINAL TAIL  
(no regeneration)

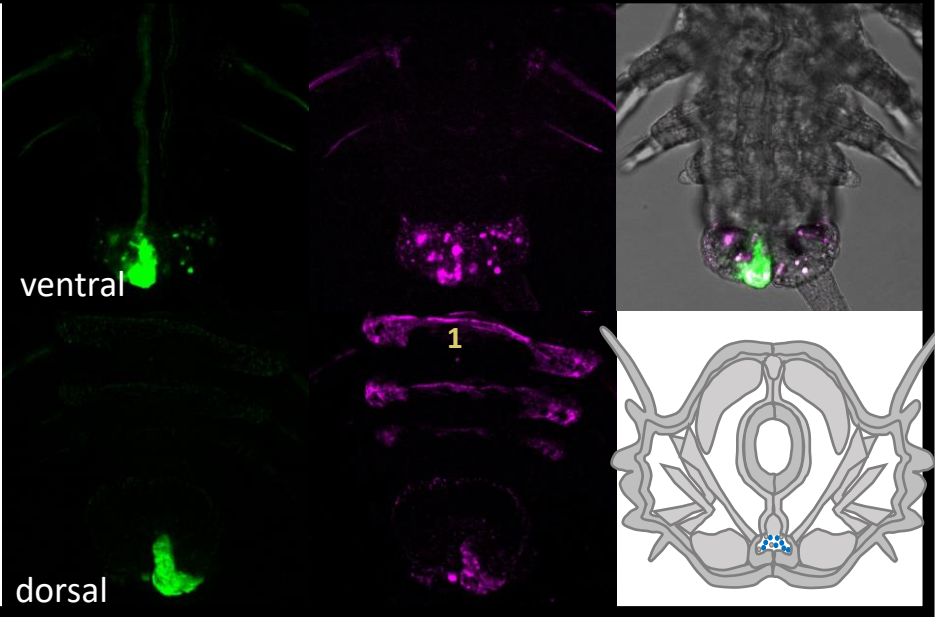

- Pygidium ectoderm, partial
- Autofluorescent cuticle in segment 1

After 1st amputation-  
regeneration

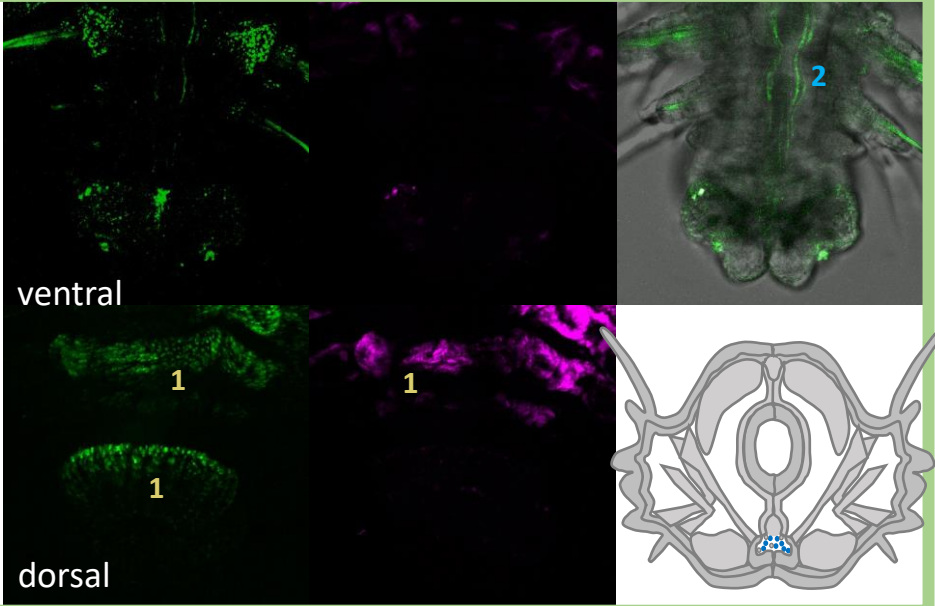

- Brain neurites 2
- Autofluorescent cuticle in segments and pygidium 1

After 2nd amputation-  
regeneration

- ectoderm
- mesoderm
- endoderm

Full Z-projections

Frontal section  
+ transverse scheme

ORIGINAL TAIL  
(no regeneration)

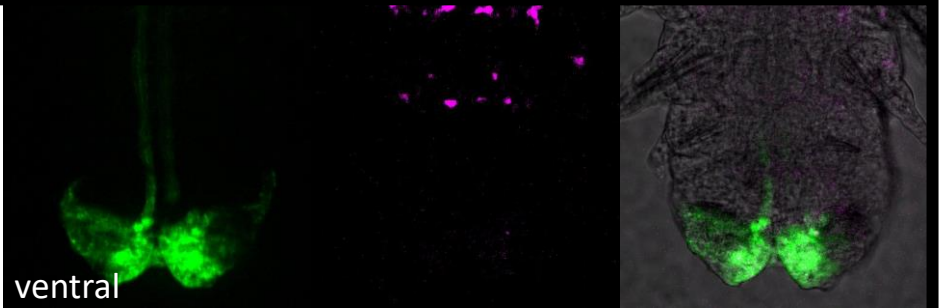

No dorsal view

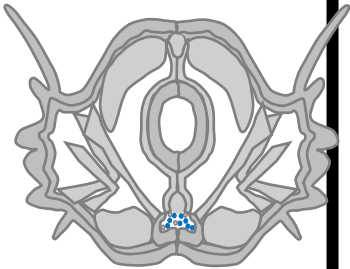

- Pygidium ectoderm, partial
- Autofluorescent cuticle in segments

After 1st amputation-  
regeneration

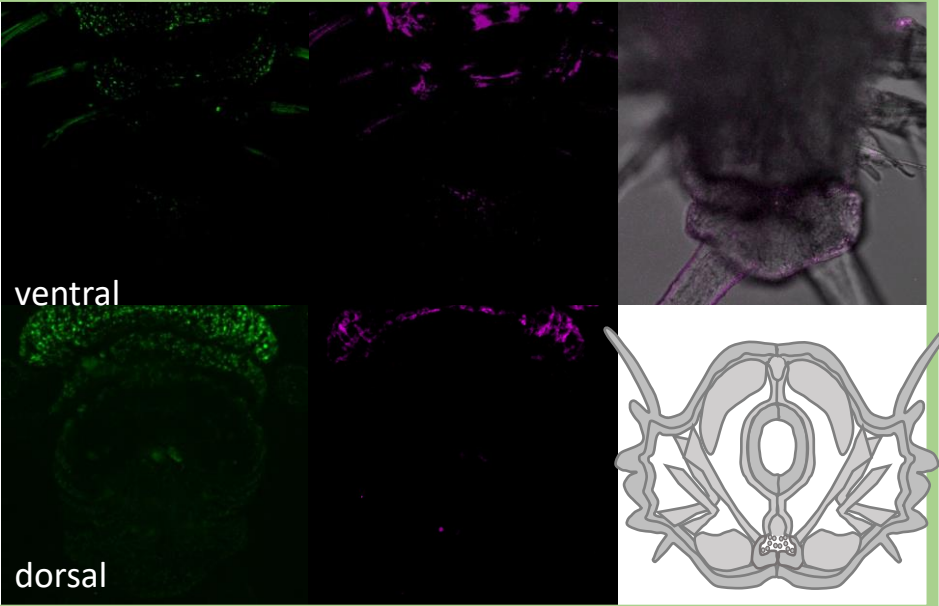

- Autofluorescent cuticle in segments

After 2nd amputation-  
regeneration



- ectoderm
- mesoderm
- endoderm

Full Z-projections

Frontal section  
+ transverse scheme

ORIGINAL TAIL  
(no regeneration)

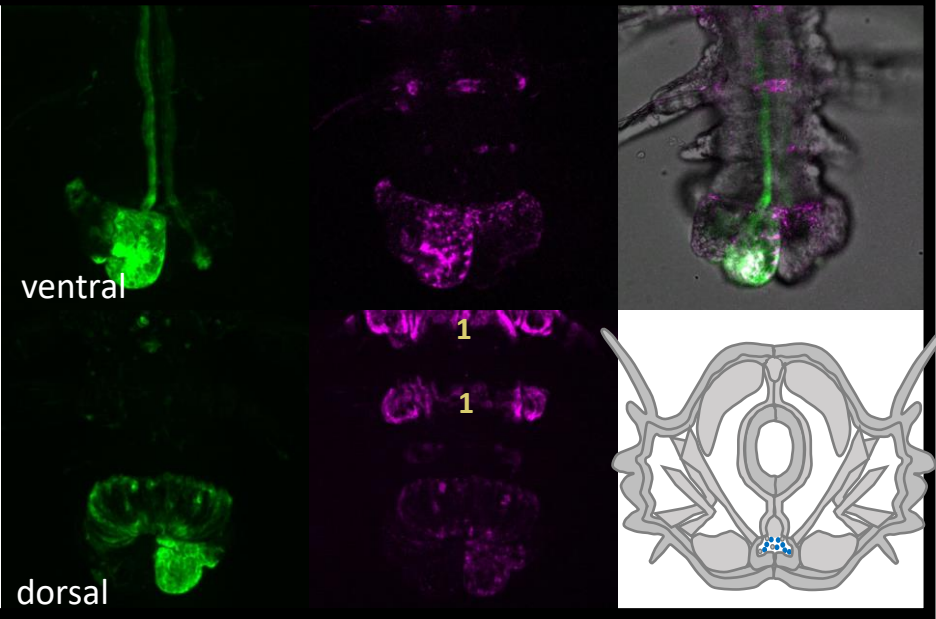

- Pygidium ectoderm, partial
- Autofluorescent cuticle in segments 1

After 1st amputation-  
regeneration

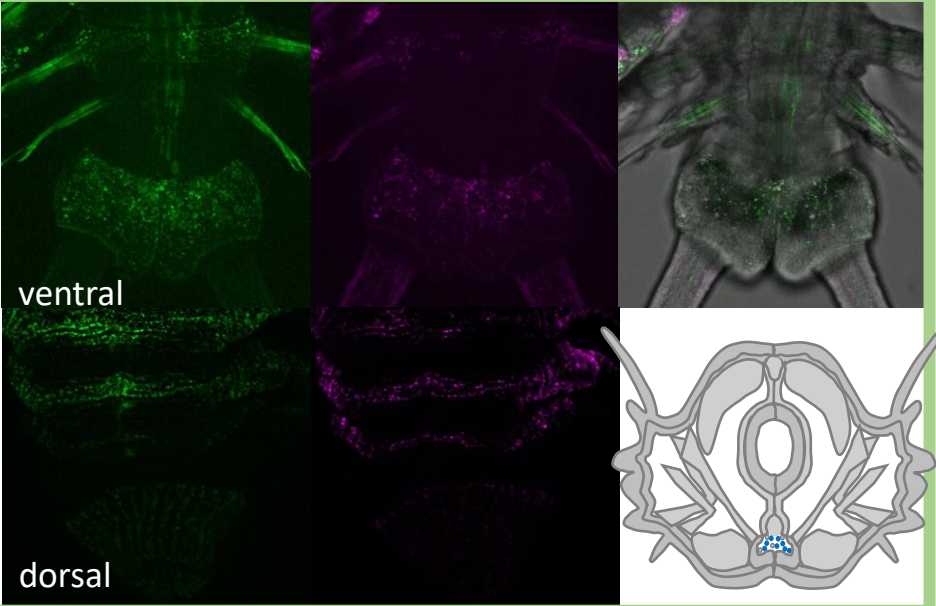

- Autofluorescent cuticle in segments and pygidium

After 2nd amputation-  
regeneration

- ectoderm
- mesoderm
- endoderm

ORIGINAL TAIL  
(no regeneration)

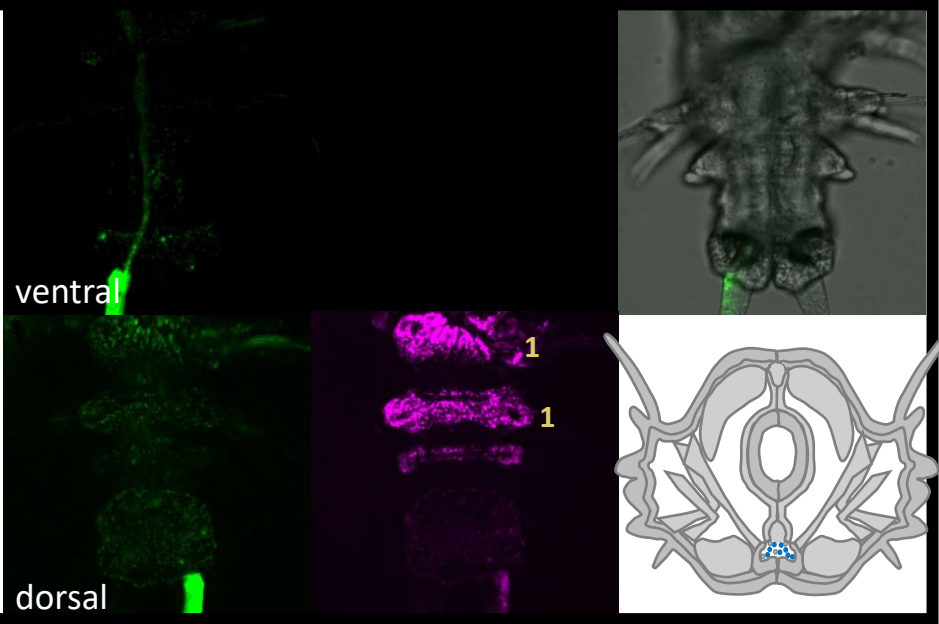

- Pygidium ectoderm, partial, right cirrus
- Autofluorescent cuticle in segments 1

After 1st amputation-  
regeneration

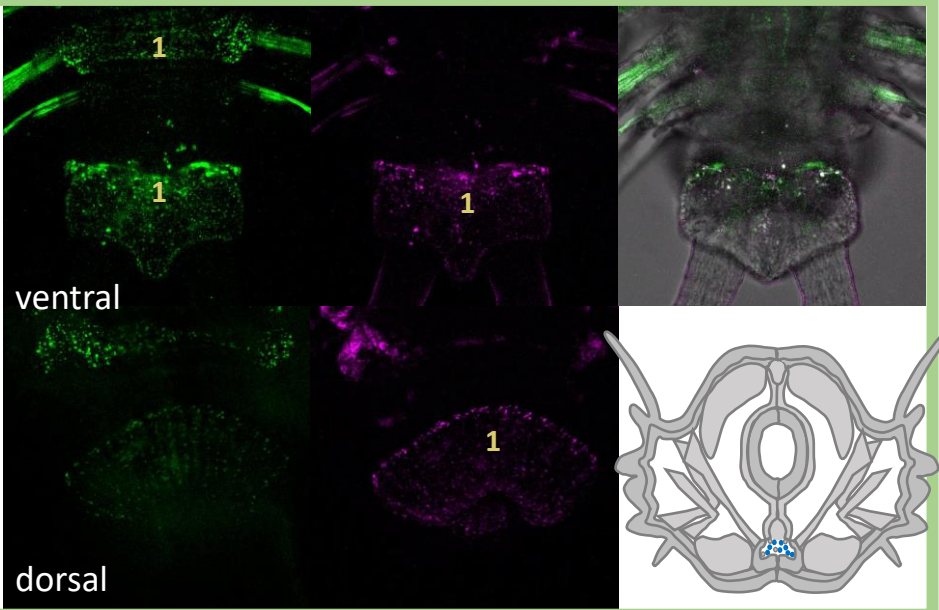

- Autofluorescent cuticle in segments and pygidium 1

After 2nd amputation-  
regeneration

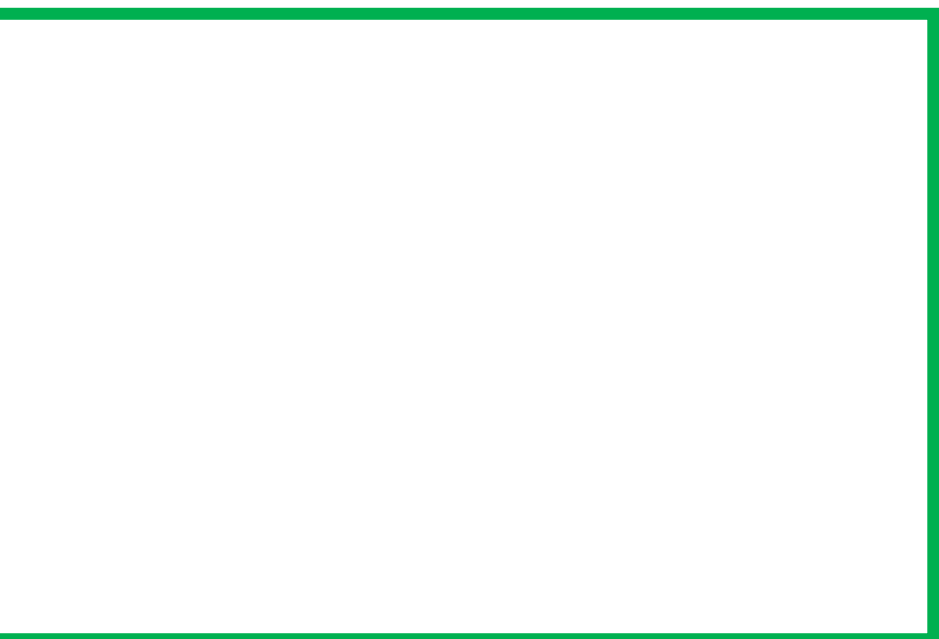

Full Z-projections

Frontal section  
+ transverse scheme

- ectoderm
- mesoderm
- endoderm

ORIGINAL TAIL  
(no regeneration)

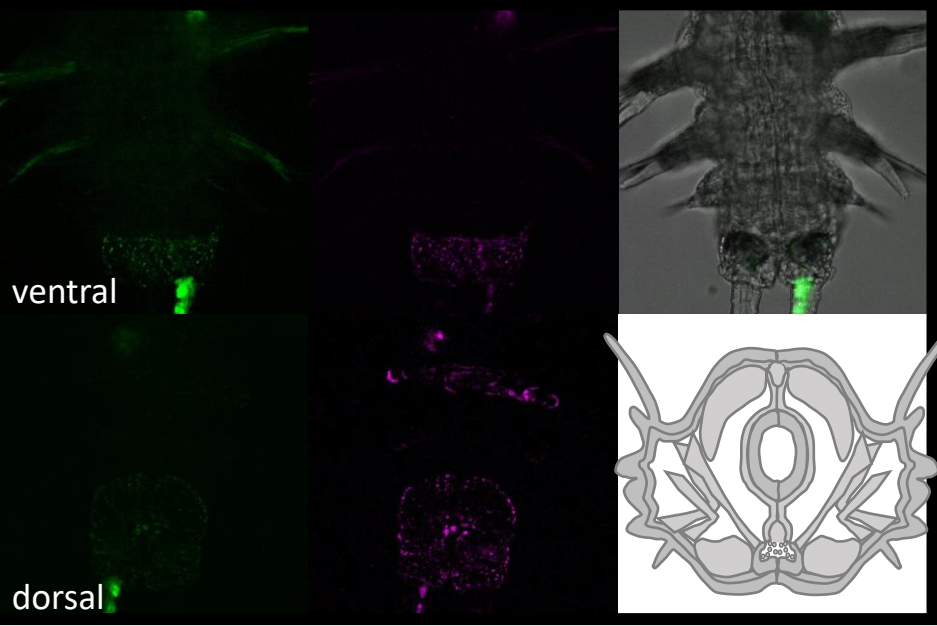

- Pygidium ectoderm, left cirrus 1
- Autofluorescent cuticle in segments and pygidium

After 1st amputation-  
regeneration

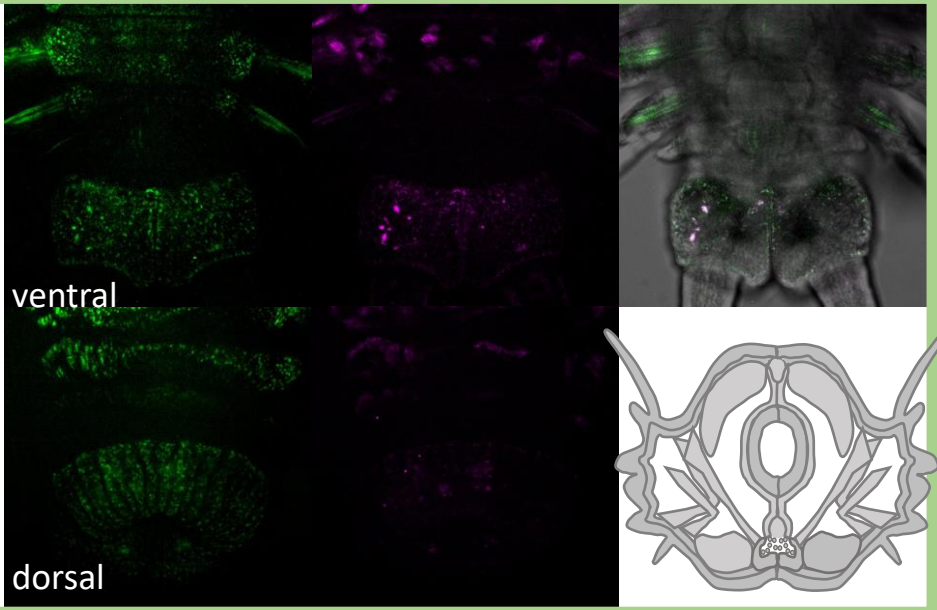

- Autofluorescent cuticle in segments and pygidium

After 2nd amputation-  
regeneration

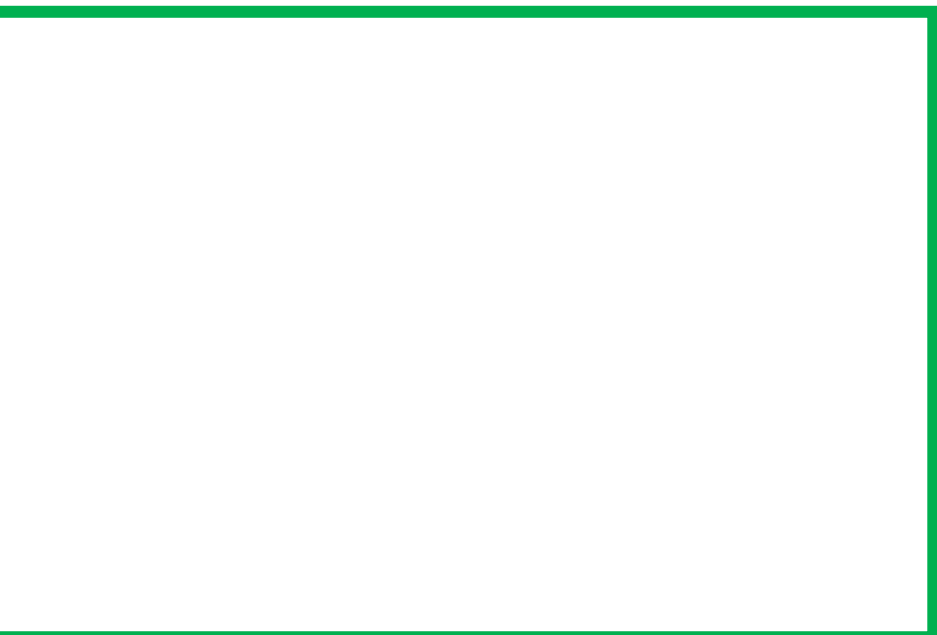



- ectoderm
- mesoderm
- endoderm

Figure 1 consists of two panels. The top panel is a fluorescence micrograph of a *Drosophila* larva. The larva is shown in a lateral view, with its head at the top and tail at the bottom. The body is segmented. A large, bright green fluorescent region is visible in the central part of the larva, representing the expression of the *UAS-mCherry* driver line. A blue arrow points to a specific neuron within this green region. The bottom panel is a schematic diagram of the larva, showing the outline of the body and the positions of the segments. The same neuron highlighted in the micrograph is shown in yellow in the schematic, indicating its location within the larval body plan.

- 

- ## After 2nd amputation- regeneration

- ectoderm
- mesoderm
- endoderm

Full Z-projections

Frontal section  
+ transverse scheme

ORIGINAL TAIL  
(no regeneration)

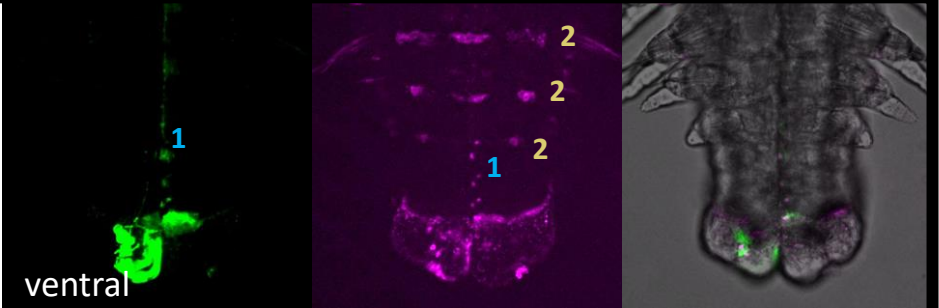

No dorsal view

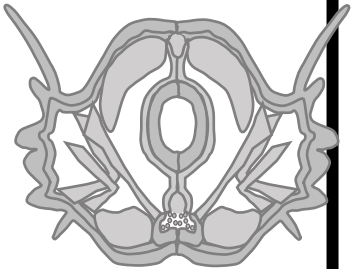

- Pygidium ectoderm, partial
- Left median neural lineage **1**
- Autofluorescent cuticle in segments and pygidium **2**

After 1st amputation-  
regeneration

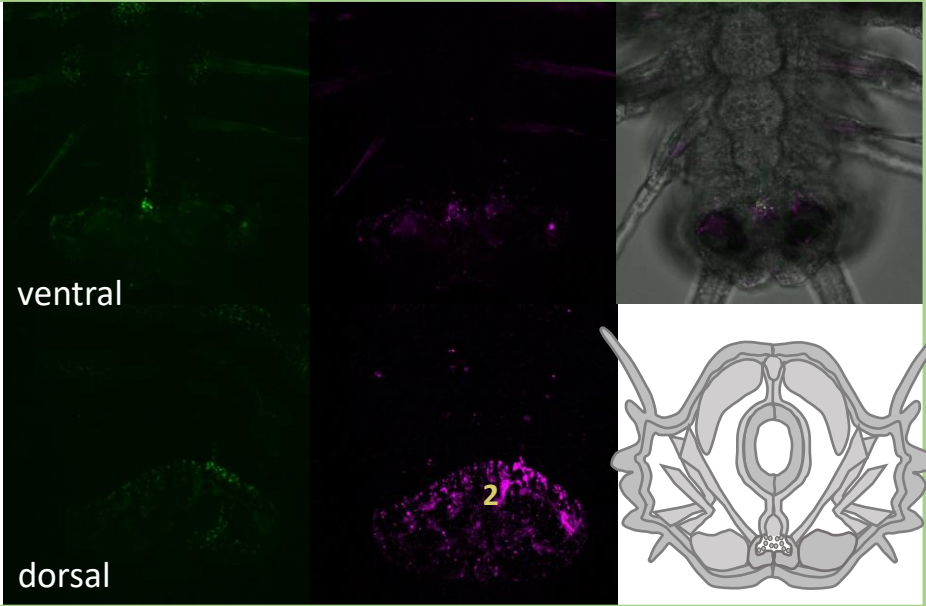

- Autofluorescent cuticle in segments and pygidium **2**

After 2nd amputation-  
regeneration

Full Z-projections

Frontal section  
+ transverse scheme

- ectoderm
- mesoderm
- endoderm

ORIGINAL TAIL  
(no regeneration)

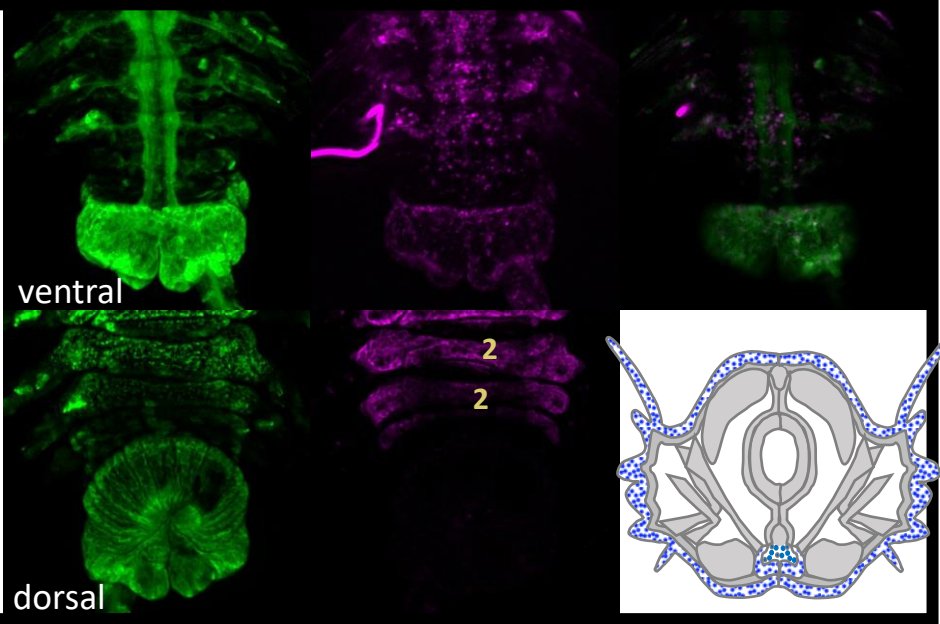

- Segmental ectoderm, weak, mostly nerves
- Pygidium ectoderm
- Autofluorescent cuticle in segments and pugidium 2

After 1st amputation-  
regeneration

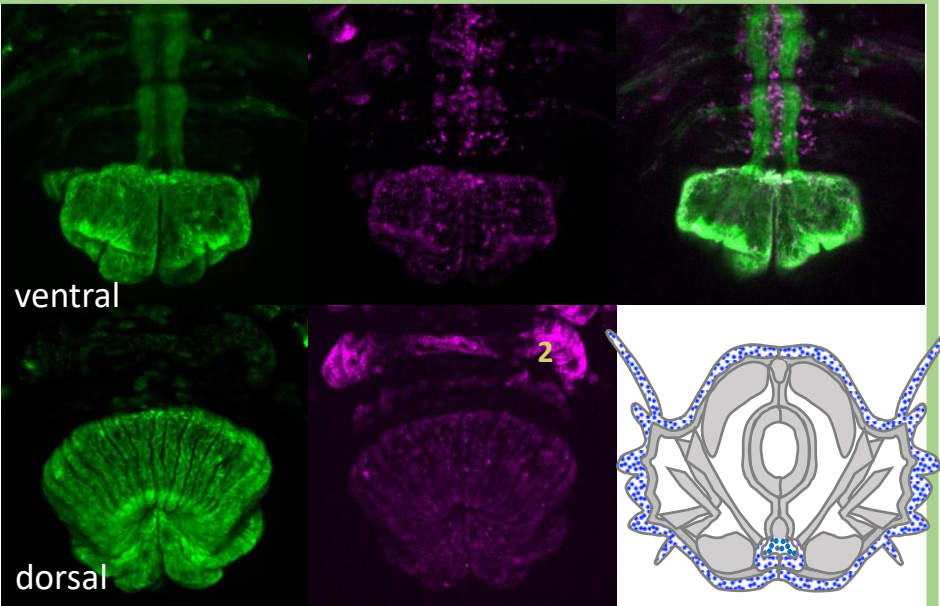

- Segmental ectoderm, very weak
- Pygidium ectoderm
- Autofluorescent cuticle in segments and pugidium 2

After 2nd amputation-  
regeneration



Supplementary data file 7, transgenic clones, part C

|              | data absent        |               | ubiquitous expression | stochastic expression |                   | partially transgenic |                |
|--------------|--------------------|---------------|-----------------------|-----------------------|-------------------|----------------------|----------------|
| animal ID    | segmental ectoderm | median neural | pygidial ectoderm     | segmental mesoderm    | pygidial mesoderm | endoderm             | amoeboid cells |
| M01 primary  |                    |               |                       |                       |                   |                      |                |
| M01 1st reg. |                    |               |                       |                       |                   |                      |                |
| M01 2nd reg. |                    |               |                       |                       |                   |                      |                |
| M03 primary  |                    |               |                       |                       |                   |                      |                |
| M03 1st reg. |                    |               |                       |                       |                   |                      |                |
| M03 2nd reg. |                    |               |                       |                       |                   |                      |                |
| M05 primary  |                    |               |                       |                       |                   |                      |                |
| M05 1st reg. |                    |               |                       |                       |                   |                      |                |
| M05 2nd reg. |                    |               |                       |                       |                   |                      |                |
| M07 primary  |                    |               |                       |                       |                   |                      |                |
| M07 1st reg. |                    |               |                       |                       |                   |                      |                |
| M07 2nd reg. |                    |               |                       |                       |                   |                      |                |
| M08 primary  |                    |               |                       |                       |                   |                      |                |
| M08 1st reg. |                    |               |                       |                       |                   |                      |                |
| M08 2nd reg. |                    |               |                       |                       |                   |                      |                |
| M09 primary  |                    |               |                       |                       |                   |                      |                |
| M09 1st reg. |                    |               |                       |                       |                   |                      |                |
| M09 2nd reg. |                    |               |                       |                       |                   |                      |                |
| M10 primary  |                    |               |                       |                       |                   |                      |                |
| M10 1st reg. |                    |               |                       |                       |                   |                      |                |
| M10 2nd reg. |                    |               |                       |                       |                   |                      |                |
| M11 primary  |                    |               |                       |                       |                   |                      |                |
| M11 1st reg. |                    |               |                       |                       |                   |                      |                |
| M11 2nd reg. |                    |               |                       |                       |                   |                      |                |
| M15 primary  |                    |               |                       |                       |                   |                      |                |
| M15 1st reg. |                    |               |                       |                       |                   |                      |                |
| M15 2nd reg. |                    |               |                       |                       |                   |                      |                |
| M18 primary  |                    |               |                       |                       |                   |                      |                |
| M18 1st reg. |                    |               |                       |                       |                   |                      |                |
| M18 2nd reg. |                    |               |                       |                       |                   |                      |                |
| M19 primary  |                    |               |                       |                       |                   |                      |                |
| M19 1st reg. |                    |               |                       |                       |                   |                      |                |
| M19 2nd reg. |                    |               |                       |                       |                   |                      |                |
| M20 primary  |                    |               |                       |                       |                   |                      |                |
| M20 1st reg. |                    |               |                       |                       |                   |                      |                |
| M20 2nd reg. |                    |               |                       |                       |                   |                      |                |
| M21 primary  |                    |               |                       |                       |                   |                      |                |
| M21 1st reg. |                    |               |                       |                       |                   |                      |                |
| M21 2nd reg. |                    |               |                       |                       |                   |                      |                |
| M22 primary  |                    |               |                       |                       |                   |                      |                |
| M22 1st reg. |                    |               |                       |                       |                   |                      |                |
| M22 2nd reg. |                    |               |                       |                       |                   |                      |                |

| animal ID    | segmental ectoderm | median neural | pygidial ectoderm | segmental mesoderm | pygidial mesoderm | endoderm | amoeboid cells |
|--------------|--------------------|---------------|-------------------|--------------------|-------------------|----------|----------------|
| M23 primary  |                    |               |                   |                    |                   |          |                |
| M23 1st reg. |                    |               |                   |                    |                   |          |                |
| M23 2nd reg. |                    |               |                   |                    |                   |          |                |
| M24 primary  |                    |               |                   |                    |                   |          |                |
| M24 1st reg. |                    |               |                   |                    |                   |          |                |
| M24 2nd reg. |                    |               |                   |                    |                   |          |                |
| M25 primary  |                    |               |                   |                    |                   |          |                |
| M25 1st reg. |                    |               |                   |                    |                   |          |                |
| M25 2nd reg. |                    |               |                   |                    |                   |          |                |
| M26 primary  |                    |               |                   |                    |                   |          |                |
| M26 1st reg. |                    |               |                   |                    |                   |          |                |
| M26 2nd reg. |                    |               |                   |                    |                   |          |                |
| M27 primary  |                    |               |                   |                    |                   |          |                |
| M27 1st reg. |                    |               |                   |                    |                   |          |                |
| M27 2nd reg. |                    |               |                   |                    |                   |          |                |
| M28 primary  |                    |               |                   |                    |                   |          |                |
| M28 1st reg. |                    |               |                   |                    |                   |          |                |
| M28 2nd reg. |                    |               |                   |                    |                   |          |                |
| M29 primary  |                    |               |                   |                    |                   |          |                |
| M29 1st reg. |                    |               |                   |                    |                   |          |                |
| M29 2nd reg. |                    |               |                   |                    |                   |          |                |
| M30 primary  |                    |               |                   |                    |                   |          |                |
| M30 1st reg. |                    |               |                   |                    |                   |          |                |
| M30 2nd reg. |                    |               |                   |                    |                   |          |                |
| N01 primary  |                    |               |                   |                    |                   |          |                |
| N01 1st reg. |                    |               |                   |                    |                   |          |                |
| N01 2nd reg. |                    |               |                   |                    |                   |          |                |
| N02 primary  |                    |               |                   |                    |                   |          |                |
| N02 1st reg. |                    |               |                   |                    |                   |          |                |
| N02 2nd reg. |                    |               |                   |                    |                   |          |                |
| N03 primary  |                    |               |                   |                    |                   |          |                |
| N03 1st reg. |                    |               |                   |                    |                   |          |                |
| N03 2nd reg. |                    |               |                   |                    |                   |          |                |
| N04 primary  |                    |               |                   |                    |                   |          |                |
| N04 1st reg. |                    |               |                   |                    |                   |          |                |
| N04 2nd reg. |                    |               |                   |                    |                   |          |                |
| N05 primary  |                    |               |                   |                    |                   |          |                |
| N05 1st reg. |                    |               |                   |                    |                   |          |                |
| N05 2nd reg. |                    |               |                   |                    |                   |          |                |
| N06 primary  |                    |               |                   |                    |                   |          |                |
| N06 1st reg. |                    |               |                   |                    |                   |          |                |
| N06 2nd reg. |                    |               |                   |                    |                   |          |                |
| N07 primary  |                    |               |                   |                    |                   |          |                |
| N07 1st reg. |                    |               |                   |                    |                   |          |                |
| N07 2nd reg. |                    |               |                   |                    |                   |          |                |

| animal ID     | segmental ectoderm | median neural | pygidial ectoderm | segmental mesoderm | pygidial mesoderm | endoderm | amoeboid cells |
|---------------|--------------------|---------------|-------------------|--------------------|-------------------|----------|----------------|
| N08 primary   |                    |               |                   |                    |                   |          |                |
| N08 1st reg.  |                    |               |                   |                    |                   |          |                |
| N08 2nd reg.  |                    |               |                   |                    |                   |          |                |
| N09 primary   |                    |               |                   |                    |                   |          |                |
| N09 1st reg.  |                    |               |                   |                    |                   |          |                |
| N09 2nd reg.  |                    |               |                   |                    |                   |          |                |
| N10 primary   |                    |               |                   |                    |                   |          |                |
| N10 1st reg.  |                    |               |                   |                    |                   |          |                |
| N10 2nd reg.  |                    |               |                   |                    |                   |          |                |
| N11 primary   |                    |               |                   |                    |                   |          |                |
| N11 1st reg.  |                    |               |                   |                    |                   |          |                |
| N11 2nd reg.  |                    |               |                   |                    |                   |          |                |
| N12 primary   |                    |               |                   |                    |                   |          |                |
| N12 1st reg.  |                    |               |                   |                    |                   |          |                |
| N12 2nd reg.  |                    |               |                   |                    |                   |          |                |
| N13 primary   |                    |               |                   |                    |                   |          |                |
| N13 1st reg.  |                    |               |                   |                    |                   |          |                |
| N13 2nd reg.  |                    |               |                   |                    |                   |          |                |
| N14 primary   |                    |               |                   |                    |                   |          |                |
| N14 1st reg.  |                    |               |                   |                    |                   |          |                |
| N14 2nd reg.  |                    |               |                   |                    |                   |          |                |
| N15 primary   |                    |               |                   |                    |                   |          |                |
| N15 1st reg.  |                    |               |                   |                    |                   |          |                |
| N15 2nd reg.  |                    |               |                   |                    |                   |          |                |
| N16 primary   |                    |               |                   |                    |                   |          |                |
| N16 1st reg.  |                    |               |                   |                    |                   |          |                |
| N16 2nd reg.  |                    |               |                   |                    |                   |          |                |
| N19 primary   |                    |               |                   |                    |                   |          |                |
| N19 1st reg.  |                    |               |                   |                    |                   |          |                |
| N19 2nd reg.  |                    |               |                   |                    |                   |          |                |
| N20 primary   |                    |               |                   |                    |                   |          |                |
| N20 1st reg.  |                    |               |                   |                    |                   |          |                |
| N20 2nd reg.  |                    |               |                   |                    |                   |          |                |
| N21A primary  |                    |               |                   |                    |                   |          |                |
| N21A 1st reg. |                    |               |                   |                    |                   |          |                |
| N21A 2nd reg. |                    |               |                   |                    |                   |          |                |
| N21B primary  |                    |               |                   |                    |                   |          |                |
| N21B 1st reg. |                    |               |                   |                    |                   |          |                |
| N21B 2nd reg. |                    |               |                   |                    |                   |          |                |
| N22 primary   |                    |               |                   |                    |                   |          |                |
| N22 1st reg.  |                    |               |                   |                    |                   |          |                |
| N22 2nd reg.  |                    |               |                   |                    |                   |          |                |
| N23 primary   |                    |               |                   |                    |                   |          |                |
| N23 1st reg.  |                    |               |                   |                    |                   |          |                |
| N23 2nd reg.  |                    |               |                   |                    |                   |          |                |



| animal ID    | segmental ectoderm | median neural | pygidial ectoderm | segmental mesoderm | pygidial mesoderm | endoderm | amoeboid cells |
|--------------|--------------------|---------------|-------------------|--------------------|-------------------|----------|----------------|
| N25 primary  |                    |               |                   |                    |                   |          |                |
| N25 1st reg. |                    |               |                   |                    |                   |          |                |
| N25 2nd reg. |                    |               |                   |                    |                   |          |                |
| N26 primary  |                    |               |                   |                    |                   |          |                |
| N26 1st reg. |                    |               |                   |                    |                   |          |                |
| N26 2nd reg. |                    |               |                   |                    |                   |          |                |
| N27 primary  |                    |               |                   |                    |                   |          |                |
| N27 1st reg. |                    |               |                   |                    |                   |          |                |
| N27 2nd reg. |                    |               |                   |                    |                   |          |                |
| N28 primary  |                    |               |                   |                    |                   |          |                |
| N28 1st reg. |                    |               |                   |                    |                   |          |                |
| N28 2nd reg. |                    |               |                   |                    |                   |          |                |
| N31 primary  |                    |               |                   |                    |                   |          |                |
| N31 1st reg. |                    |               |                   |                    |                   |          |                |
| N31 2nd reg. |                    |               |                   |                    |                   |          |                |
| N33 primary  |                    |               |                   |                    |                   |          |                |
| N33 1st reg. |                    |               |                   |                    |                   |          |                |
| N33 2nd reg. |                    |               |                   |                    |                   |          |                |
| N35 primary  |                    |               |                   |                    |                   |          |                |
| N35 1st reg. |                    |               |                   |                    |                   |          |                |
| N35 2nd reg. |                    |               |                   |                    |                   |          |                |
| N36 primary  |                    |               |                   |                    |                   |          |                |
| N36 1st reg. |                    |               |                   |                    |                   |          |                |
| N36 2nd reg. |                    |               |                   |                    |                   |          |                |
| N38 primary  |                    |               |                   |                    |                   |          |                |
| N38 1st reg. |                    |               |                   |                    |                   |          |                |
| N38 2nd reg. |                    |               |                   |                    |                   |          |                |
| N39 primary  |                    |               |                   |                    |                   |          |                |
| N39 1st reg. |                    |               |                   |                    |                   |          |                |
| N39 2nd reg. |                    |               |                   |                    |                   |          |                |
| N40 primary  |                    |               |                   |                    |                   |          |                |
| N40 1st reg. |                    |               |                   |                    |                   |          |                |
| N40 2nd reg. |                    |               |                   |                    |                   |          |                |
| O02 primary  |                    |               |                   |                    |                   |          |                |
| O02 1st reg. |                    |               |                   |                    |                   |          |                |
| O02 2nd reg. |                    |               |                   |                    |                   |          |                |
| O04 primary  |                    |               |                   |                    |                   |          |                |
| O04 1st reg. |                    |               |                   |                    |                   |          |                |
| O04 2nd reg. |                    |               |                   |                    |                   |          |                |
| O06 primary  |                    |               |                   |                    |                   |          |                |
| O06 1st reg. |                    |               |                   |                    |                   |          |                |
| O06 2nd reg. |                    |               |                   |                    |                   |          |                |
| O07 primary  |                    |               |                   |                    |                   |          |                |
| O07 1st reg. |                    |               |                   |                    |                   |          |                |
| O07 2nd reg. |                    |               |                   |                    |                   |          |                |

| animal ID    | segmental ectoderm | median neural | pygidial ectoderm | segmental mesoderm | pygidial mesoderm | endoderm | amoeboid cells |
|--------------|--------------------|---------------|-------------------|--------------------|-------------------|----------|----------------|
| O08 primary  |                    |               |                   |                    |                   |          |                |
| O08 1st reg. |                    |               |                   |                    |                   |          |                |
| O08 2nd reg. |                    |               |                   |                    |                   |          |                |
| O09 primary  |                    |               |                   |                    |                   |          |                |
| O09 1st reg. |                    |               |                   |                    |                   |          |                |
| O09 2nd reg. |                    |               |                   |                    |                   |          |                |
| O15 primary  |                    |               |                   |                    |                   |          |                |
| O15 1st reg. |                    |               |                   |                    |                   |          |                |
| O15 2nd reg. |                    |               |                   |                    |                   |          |                |
| O16 primary  |                    |               |                   |                    |                   |          |                |
| O16 1st reg. |                    |               |                   |                    |                   |          |                |
| O16 2nd reg. |                    |               |                   |                    |                   |          |                |

Missing data are mostly due to adults maturing prematurely or dying accidentally

#### Frequency of patterns (= primary clones)

|                       | segmental ectoderm | median neural | pygidial ectoderm | segmental mesoderm | pygidial mesoderm | endoderm | amoeboid cells |
|-----------------------|--------------------|---------------|-------------------|--------------------|-------------------|----------|----------------|
| ubiquitous expression | 7                  | 4             | 6                 | 3                  |                   | 4        | 4              |
| stochastic expression | 21                 |               | 1                 |                    |                   | 2        |                |
| partially transgenic  | 1                  | 9             | 46                | 3                  | 1                 | 10       |                |
| Total                 | 29                 | 13            | 53                | 6                  | 1                 | 16       | 4              |

| Total positive | Total survivors |
|----------------|-----------------|
| 62             | 87              |

#### Transmission of transgenic expression through regeneration

|                    |                | segmental ectoderm<br>before regeneration | segmental ectoderm<br>after regeneration |
|--------------------|----------------|-------------------------------------------|------------------------------------------|
| segmental ectoderm | transgenic     | 39                                        | 39                                       |
|                    | non transgenic | 38                                        | 38                                       |
|                    |                | pygidial ectoderm<br>before regeneration  | pygidial ectoderm<br>after regeneration  |
| segmental ectoderm | transgenic     | 39                                        | 39                                       |
|                    | non transgenic | 38                                        | 38                                       |
|                    |                | before regeneration                       | after regeneration                       |
| segmental mesoderm | transgenic     | 11                                        | 11                                       |
|                    | non transgenic | 66                                        | 66                                       |
|                    |                | before regeneration                       | after regeneration                       |
| endoderm           | transgenic     | 23                                        | 22                                       |
|                    | non transgenic | 54                                        | 54                                       |
|                    |                | Total experiments                         |                                          |
|                    |                | 77                                        |                                          |
